# Supplementary material
Source: publisher figshare collection journal article supplement (https://rs.figshare.com/ndownloader/files/36851429)
Supplement: Supplementary file 1 [file 36851429]

## Sheet: Sheet1
Dataset S1: Raw specimen morphometric data used in this study. Abbreviations are snout-vent length (SVL), total length (TL), right fang length (RFL), left fang length (LFL), interfang distance (IFD), head length (HL), mean fang length (MFL), and fang length:head length ratio (FL_HL).
institutionCode	catalogNumber	museumID	CORRECT_scientificName	ImageID	SVL	TL	Sex	RFL	LFL	IFD	HL	MFL	HLmm	SVLmm	FL_HL
CAS	170416	CAS170416	Crotalus viridis	__CAS_170416	64	4.2	1	6.5	6.76	6.52	2.413	6.63	24.13	640	0.274762
CAS	170423	CAS170423	Crotalus oreganus	__CAS_170423	82	6.6	1	8.09	8.36	7.95	3.162	8.225	31.62	820	0.26012
CAS	170426	CAS170426	Crotalus oreganus	__CAS_170426	64.9	5.4	1	7	7.1	7.82	2.741	7.05	27.41	649	0.257205
CAS	170428	CAS170428	Crotalus oreganus	__CAS_170428	63.5	4.1	2	7.83	7.54	7.04	2.467	7.685	24.67	635	0.311512
CAS	170431	CAS170431	Crotalus oreganus	__CAS_170431	72.5	4.5	2	7.85	7.79	8.03	2.687	7.82	26.87	725	0.291031
CAS	170443	CAS170443	Crotalus viridis	__CAS_170443	64.8	3.8	2	6.91	6.57	7.22	2.545	6.74	25.45	648	0.264833
CAS	170445	CAS170445	Crotalus viridis	__CAS_170445	70.8	3	2	7.34		7.64	2.768	7.34	27.68	708	0.265173
CAS	170447	CAS170447	Crotalus viridis	__CAS_170447	74	6	1	9.24	9.34	7.63	3.017	9.29	30.17	740	0.307922
CAS	170453	CAS170453	Crotalus viridis	__CAS_170453	82.5	5	1	8.03	8.07	7.72	2.906	8.05	29.06	825	0.277013
CAS	170455	CAS170455	Crotalus viridis	__CAS_170455	83.3	4.3	2	9.41	9.39	8.31	3.159	9.4	31.59	833	0.297563
CAS	170456	CAS170456	Crotalus viridis	__CAS_170456	73.6	86.3	1	8.62	9.21	6.64	2.942	8.915	29.42	736	0.303025
CAS	170457	CAS170457	Crotalus viridis	__CAS_170457	85	4.5	2	8.5	9.19	7.92	2.95	8.845	29.5	850	0.299831
CAS	170460	CAS170460	Crotalus viridis	__CAS_170460	52	3.6	1	6.18	5.27	5.75	2.091	5.725	20.91	520	0.273792
CAS	170461	CAS170461	Crotalus viridis	__CAS_170461	53.2	2.9	2		5.9	5.25	2.024	5.9	20.24	532	0.291502
CAS	170462	CAS170462	Crotalus oreganus	__CAS_170462	57.4	5	1	5.51	5.66	7.52	2.354	5.585	23.54	574	0.237256
CAS	170463	CAS170463	Crotalus oreganus	__CAS_170463	56	4.6	1	6.48	5.54	6.35	2.192	6.01	21.92	560	0.274179
CAS	170464	CAS170464	Crotalus oreganus	__CAS_170464	59.3	3.9	2	5.69	6.28	6.54	2.327	5.985	23.27	593	0.257198
CAS	170465	CAS170465	Crotalus viridis	__CAS_170465	55	3.3	2	5.22	5.81	7.17	2.221	5.515	22.21	550	0.248312
CAS	170467	CAS170467	Crotalus viridis	__CAS_170467	78.3	6.4	1	9.83	9.9	7.73	3.274	9.865	32.74	783	0.301313
CAS	170468	CAS170468	Crotalus viridis	__CAS_170468	68	6.2	1	7.84	8.3	7.69	2.588	8.07	25.88	680	0.311824
CAS	170469	CAS170469	Crotalus viridis	__CAS_170469	60.7	3.7	2	7.11	6.62	7.93	2.384	6.865	23.84	607	0.287961
CAS	170481	CAS170481	Crotalus oreganus	__CAS_170481	75.5	3.7	2	6.52	6.64	6.3	2.582	6.58	25.82	755	0.254841
CAS	170482	CAS170482	Crotalus viridis	__CAS_170482	88.4	6.1	1	10.96	10.39	7.49	3.192	10.675	31.92	884	0.33443
CAS	170484	CAS170484	Crotalus viridis	__CAS_170484	77.8	1	1	7.45	8.93	8.23	3.159	8.19	31.59	778	0.259259
CAS	170492	CAS170492	Crotalus oreganus	__CAS_170492	86	7	1	9.65	9.28	8.84	3.102	9.465	31.02	860	0.305126
CAS	170501	CAS170501	Crotalus viridis	__CAS_170501	76.6	7	1	8.56	8.08	9.8	3.164	8.32	31.64	766	0.262958
CAS	170503	CAS170503	Crotalus viridis	__CAS_170503	73.6	6.8	1	7.36	6.55	7.76	2.53	6.955	25.3	736	0.274901
CAS	170504	CAS170504	Crotalus cerberus	__CAS_170504	92.3	6.1	1	10.51	11.11	9.23	3.107	10.81	31.07	923	0.347924
CAS	170507	CAS170507	Crotalus cerberus	__CAS_170507	92.6	6	1	10.06	12.13	10.51	3.171	11.095	31.71	926	0.34989
CAS	170510	CAS170510	Crotalus cerberus	__CAS_170510	84.7	6.3	1	9.28	9.19	9.68	2.839	9.235	28.39	847	0.325291
CAS	170513	CAS170513	Crotalus oreganus	__CAS_170513	66.5	4	2	6.66	7.19	7.21	2.458	6.925	24.58	665	0.281733
CAS	170517	CAS170517	Crotalus cerberus	__CAS_170517	105	8	1	10.9	11.04	10.48	3.781	10.97	37.81	1050	0.290135
CAS	170518	CAS170518	Crotalus cerberus	__CAS_170518	92.1	8	1	8.66	9.62	10.83	3.385	9.14	33.85	921	0.270015
CAS	172070	CAS172070	Crotalus viridis	__CAS_172070	84	6.3	1	8.82	8.56	8.77	2.981	8.69	29.81	840	0.291513
CAS	95825	CAS95825	Agkistrodon bilineatus	Agkistrodon_bilineatus_bilineatus_CAS_95825	63.1	15.7	1		10.07	9.99	3.618	10.07	36.18	631	0.278331
CAS	204152	CAS204152	Agkistrodon bilineatus	Agkistrodon_bilineatus_CAS_204152	42.3	10.8	1	6.9	7.7	7.18	3.139	7.3	31.39	423	0.232558
CAS	204153	CAS204153	Agkistrodon bilineatus	Agkistrodon_bilineatus_CAS_204153	74.7	18.5	1		11.42	9.92	4.604	11.42	46.04	747	0.248045
LACM	59184	LACM59184	Agkistrodon taylori	Agkistrodon_bilineatus_LACM_59184	55.2	9.5	2	7.91	7.91	7.87	3.743	7.91	37.43	552	0.211328
LACM	7193	LACM7193	Agkistrodon bilineatus	Agkistrodon_bilineatus_LACM_7193	42.2	10	1	7.16	7.07	7.3	3.167	7.115	31.67	422	0.224661
MVZ	229768	MVZ229768	Agkistrodon howardgloydi	Agkistrodon_bilineatus_MVZ_229768	80	10.6	1	11.56	12.08	10.14	4.46	11.82	44.6	800	0.265022
MVZ	45723	MVZ45723	Agkistrodon russeolus	Agkistrodon_bilineatus_MVZ_45723	71.4	12.5	1	12.46	13.35	10.43	5.056	12.905	50.56	714	0.255241
MVZ	70293	MVZ70293	Agkistrodon bilineatus	Agkistrodon_bilineatus_MVZ_70293	36.2	7.2	1	6.27	5.88	5.92	2.534	6.075	25.34	362	0.23974
UIMNH	10002	UIMNH10002	Agkistrodon taylori	Agkistrodon_bilineatus_taylori_UIMNH_10002	40	8.1	1	5.96	6.14	5.81	2.791	6.05	27.91	400	0.216768
UTA	59855		Agkistrodon howardgloydi	Agkistrodon_bilineatus_UTA_59855	59.5	12.7	2	8.31	8.93	10.6	3.961	8.62	39.61	595	0.217622
UTA	6358	UTA6358	Agkistrodon bilineatus	Agkistrodon_bilineatus_UTA_6358	65.5	14.6	1	10.92	11.18	10.47	4.464	11.05	44.64	655	0.247536
UTA	6359	UTA6359	Agkistrodon bilineatus	Agkistrodon_bilineatus_UTA_6359	73.4	15.7	1	11.04	11.23	10.57	4.534	11.135	45.34	734	0.245589
CAS	203558	CAS203558	Agkistrodon contortrix	Agkistrodon_contortrix_CAS_203558	49.9	6.7	1	5.96	5.39	7.04	2.697	5.675	26.97	499	0.210419
CAS	203559	CAS203559	Agkistrodon contortrix	Agkistrodon_contortrix_CAS_203559	48.3	7	1	6.33	6.49	5.74	2.654	6.41	26.54	483	0.241522
CAS	203564	CAS203564	Agkistrodon contortrix	Agkistrodon_contortrix_CAS_203564	68.1	10	1	6.52	6.45	8.92	3.301	6.485	33.01	681	0.196456
CAS	203565	CAS203565	Agkistrodon contortrix	Agkistrodon_contortrix_CAS_203565	62	9.6	1	5.96	5.9	8.95	3.363	5.93	33.63	620	0.176331
CAS	203566	CAS203566	Agkistrodon contortrix	Agkistrodon_contortrix_CAS_203566	48	7.3	1	5.14	5.15	7.38	2.592	5.145	25.92	480	0.198495
CAS	92160	CAS92160	Agkistrodon contortrix	Agkistrodon_contortrix_contortrix_CAS_92160	51	7.9	1	5.07		6.18	2.407	5.07	24.07	510	0.210636
INHS	10584	INHS10584	Agkistrodon contortrix	Agkistrodon_contortrix_INHS_10584	72	9.6	2	7.37	7.74	7.28	3.527	7.555	35.27	720	0.214205
INHS	11341	INHS11341	Agkistrodon contortrix	Agkistrodon_contortrix_INHS_11341	58.3			6.96	7.38	7.96	3.042	7.17	30.42	583	0.2357
INHS	11937	INHS11937	Agkistrodon contortrix	Agkistrodon_contortrix_INHS_11937	58.4	7.5	1	6.21	6.22	6.88	2.982	6.215	29.82	584	0.208417
INHS	1464	INHS1464	Agkistrodon contortrix	Agkistrodon_contortrix_INHS_1464	95.2	12.1	1	9.46	9.02	10.48	3.603	9.24	36.03	952	0.256453
INHS	1465	INHS1465	Agkistrodon contortrix	Agkistrodon_contortrix_INHS_1465	69.9	10.1	1	6.87	7.62	7.36	2.98	7.245	29.8	699	0.243121
INHS	1466	INHS1466	Agkistrodon contortrix	Agkistrodon_contortrix_INHS_1466	68.8	9	1	8.56	7.44	8.52	3.283	8	32.83	688	0.24368
INHS	1782	INHS1782	Agkistrodon contortrix	Agkistrodon_contortrix_INHS_1782	51	8	1	5.13	5.59	7.19	2.833	5.36	28.33	510	0.189199
INHS	1783	INHS1783	Agkistrodon contortrix	Agkistrodon_contortrix_INHS_1783	70.5	9.1	2	7.57	6.53	6.67	3.283	7.05	32.83	705	0.214743
INHS	19540	INHS19540	Agkistrodon contortrix	Agkistrodon_contortrix_INHS_19540	68.3	10.7	1	8.37	7.91	8.68	3.024	8.14	30.24	683	0.26918
INHS	20152	INHS20152	Agkistrodon contortrix	Agkistrodon_contortrix_INHS_20152	98.7	11.8	1	10.89	A	9.16	3.755	10.89	37.55	987	0.290013
INHS	20153	INHS20153	Agkistrodon contortrix	Agkistrodon_contortrix_INHS_20153	91.5	11.6	1	9.04	10.73	10.66	3.578	9.885	35.78	915	0.276272
INHS	20489	INHS20489	Agkistrodon contortrix	Agkistrodon_contortrix_INHS_20489	68.5	10.6	1	7.27	8.52	7.42	3.518	7.895	35.18	685	0.224417
INHS	2551	INHS2551	Agkistrodon contortrix	Agkistrodon_contortrix_INHS_2551	62	8.1	1	8.08	7.73	6.49	3.139	7.905	31.39	620	0.251832
INHS	3561	INHS3561	Agkistrodon contortrix	Agkistrodon_contortrix_INHS_3561	75.3	9.5	1	6.71	6.46	6.98	3.374	6.585	33.74	753	0.195169
INHS	4163	INHS4163	Agkistrodon contortrix	Agkistrodon_contortrix_INHS_4163	75.5	9	1	7.78	8.1	8.15	3.229	7.94	32.29	755	0.245897
INHS	4429	INHS4429	Agkistrodon contortrix	Agkistrodon_contortrix_INHS_4429	81.7	9	1	7.5	7.82	7.98	3.362	7.66	33.62	817	0.227841
INHS	4937	INHS4937	Agkistrodon contortrix	Agkistrodon_contortrix_INHS_4937	51.6	8.1	1	6.6	5.56	7.04	2.629	6.08	26.29	516	0.231267
INHS	5831	INHS5831	Agkistrodon contortrix	Agkistrodon_contortrix_INHS_5831	56.1	7.5	2	7.76	6.64	7.12	2.876	7.2	28.76	561	0.250348
INHS	6119	INHS6119	Agkistrodon contortrix	Agkistrodon_contortrix_INHS_6119	69.1	10.1	1	7.78	7.81	6.89	3.131	7.795	31.31	691	0.248962
INHS	8399	INHS8399	Agkistrodon contortrix	Agkistrodon_contortrix_INHS_8399	62.2	10.5	1	7.32	7.78	7.4	2.98	7.55	29.8	622	0.253356
INHS	8403	INHS8403	Agkistrodon contortrix	Agkistrodon_contortrix_INHS_8403	72.1	8.6	1	8.18	7.9	8.17	3.475	8.04	34.75	721	0.231367
INHS	8409	INHS8409	Agkistrodon contortrix	Agkistrodon_contortrix_INHS_8409	76	10.2	1	7.18	8.93	7.6	3.283	8.055	32.83	760	0.245355
INHS	9602	INHS9602	Agkistrodon contortrix	Agkistrodon_contortrix_INHS_9602	51.9	9.1	2	7.44	7.12	7.86	3.228	7.28	32.28	519	0.225527
INHS	9612	INHS9612	Agkistrodon contortrix	Agkistrodon_contortrix_INHS_9612	68.1	10.9	1	8.78	9.22	8.59	3.579	9	35.79	681	0.251467
INHS	9807	INHS9807	Agkistrodon contortrix	Agkistrodon_contortrix_INHS_9807	89	9.4	1	7.33	6.48	7.97	3.387	6.905	33.87	890	0.203868
CAS	74429	CAS74429	Agkistrodon contortrix	Agkistrodon_contortrix_laticinctus_CAS_74429	50.2	8.6	1	6.35	6.02	7.7	2.945	6.185	29.45	502	0.210017
MVZ	129388	MVZ129388	Agkistrodon contortrix	Agkistrodon_contortrix_MVZ_129388	67.4	9.7	1	9.53	9.97	10.46	3.853	9.75	38.53	674	0.25305
MVZ	129389	MVZ129389	Agkistrodon contortrix	Agkistrodon_contortrix_MVZ_129389	48.2	7.6	1	5.69	6.31	6.39	2.86	6	28.6	482	0.20979
MVZ	13993	MVZ13993	Agkistrodon contortrix	Agkistrodon_contortrix_MVZ_13993	74.1	9.7	1	6.27	5.38	7.37	3.479	5.825	34.79	741	0.167433
MVZ	14032	MVZ14032	Agkistrodon contortrix	Agkistrodon_contortrix_MVZ_14032	53.1	9	1	6.83	7.59	7.45	3.048	7.21	30.48	531	0.236549
MVZ	140671	MVZ140671	Agkistrodon contortrix	Agkistrodon_contortrix_MVZ_140671	54.3	8	1	5.09	6.41	6.4	2.675	5.75	26.75	543	0.214953
MVZ	14895	MVZ14895	Agkistrodon contortrix	Agkistrodon_contortrix_MVZ_14895	60.9	8.6	1	7.15	6.15	8.6	2.933	6.65	29.33	609	0.22673
MVZ	21748	MVZ21748	Agkistrodon contortrix	Agkistrodon_contortrix_MVZ_21748	48.2	7.6	1	5.03	5.08	8.35	2.721	5.055	27.21	482	0.185777
MVZ	21750	MVZ21750	Agkistrodon contortrix	Agkistrodon_contortrix_MVZ_21750	43.2	6.8	1	5.09	4.49	6.55	2.415	4.79	24.15	432	0.198344
MVZ	21758	MVZ21758	Agkistrodon contortrix	Agkistrodon_contortrix_MVZ_21758	50.3	7.2	1	4	4.83	6.75	2.836	4.415	28.36	503	0.155677
MVZ	21759	MVZ21759	Agkistrodon contortrix	Agkistrodon_contortrix_MVZ_21759	63.4	8.2	1	5.82	5.87	7.24	3.154	5.845	31.54	634	0.18532
MVZ	21760	MVZ21760	Agkistrodon contortrix	Agkistrodon_contortrix_MVZ_21760	55	8.4	1	6.94	7.19	6.94	2.871	7.065	28.71	550	0.246082
MVZ	38466	MVZ38466	Agkistrodon contortrix	Agkistrodon_contortrix_MVZ_38466	79.5	10.6	1	6.98	6.49	10.34	3.747	6.735	37.47	795	0.179744
MVZ	38467	MVZ38467	Agkistrodon contortrix	Agkistrodon_contortrix_MVZ_38467	58.2	8.4	2	6.19	6.23	7.86	3.103	6.21	31.03	582	0.200129
MVZ	38468	MVZ38468	Agkistrodon contortrix	Agkistrodon_contortrix_MVZ_38468	76.6	11.4	1	7.26	7.9	7.49	3.462	7.58	34.62	766	0.218949
MVZ	38469	MVZ38469	Agkistrodon contortrix	Agkistrodon_contortrix_MVZ_38469	75.2	11.4	1	7.14	6.96	10.82	3.566	7.05	35.66	752	0.197701
MVZ	46773	MVZ46773	Agkistrodon contortrix	Agkistrodon_contortrix_MVZ_46773	60.6	9.2	1	6.77	7.32	6.54	3.098	7.045	30.98	606	0.227405
MVZ	56991	MVZ56991	Agkistrodon contortrix	Agkistrodon_contortrix_MVZ_56991	60.5	9.3	1	7.08	6.88	7.01	3.016	6.98	30.16	605	0.231432
CAS	62637	CAS62637	Agkistrodon contortrix	Agkistrodon_contortrix_phaeogaster_CAS_62637	56.8	8.3	1	5.72	5.65	6.34	2.639	5.685	26.39	568	0.215423
CAS	71629	CAS71629	Agkistrodon contortrix	Agkistrodon_contortrix_phaeogaster_CAS_71629	71.2	9.3	1	6.53	5.99	8.38	2.979	6.26	29.79	712	0.210138
CAS	71630	CAS71630	Agkistrodon contortrix	Agkistrodon_contortrix_phaeogaster_CAS_71630	66.1	9.7	1	7.31	7.57	8.92	3.624	7.44	36.24	661	0.205298
CAS	71631	CAS71631	Agkistrodon contortrix	Agkistrodon_contortrix_phaeogaster_CAS_71631	54.3	8.6	1	6.5	6.32	7.16	2.833	6.41	28.33	543	0.226262
CAS	71637	CAS71637	Agkistrodon contortrix	Agkistrodon_contortrix_phaeogaster_CAS_71637	73.3	10.4	1	6.61	6.28	6.86	3.4	6.445	34	733	0.189559
UTA	1323		Agkistrodon contortrix	Agkistrodon_contortrix_UTA_1323	65.4	9.5	1	7.4	7.82	8.07	3.292	7.61	32.92	654	0.231166
UTA	19488		Agkistrodon contortrix	Agkistrodon_contortrix_UTA_19488	65.5	10.9	1	8.49	8.79	9.08	3.631	8.64	36.31	655	0.237951
UTA	61309		Agkistrodon contortrix	Agkistrodon_contortrix_UTA_61309	50.6	8.2	1	6.86	6.43	7.78	3.262	6.645	32.62	506	0.203709
INHS	10580	INHS10580	Agkistrodon piscivorus	Agkistrodon_piscivorus_INHS_10580	63.5	12	1	8.52	8.72	8.89	4.001	8.62	40.01	635	0.215446
INHS	12556	INHS12556	Agkistrodon piscivorus	Agkistrodon_piscivorus_INHS_12556	75	10		10.91	9.89	9.54	4.299	10.4	42.99	750	0.241917
INHS	1411	INHS1411	Agkistrodon piscivorus	Agkistrodon_piscivorus_INHS_1411	85.4	12	2	12.14	11.07	12.52	4.61	11.605	46.1	854	0.251735
INHS	1413	INHS1413	Agkistrodon piscivorus	Agkistrodon_piscivorus_INHS_1413	102	13.4	1	13.08	13.2	15.1	5.208	13.14	52.08	1020	0.252304
INHS	1417	INHS1417	Agkistrodon piscivorus	Agkistrodon_piscivorus_INHS_1417	41.5	7.7	1	6.99	6.98	7.83	3.259	6.985	32.59	415	0.21433
INHS	1424	INHS1424	Agkistrodon piscivorus	Agkistrodon_piscivorus_INHS_1424	69.4	81.3	2	9.53	9.04	9.29	4.485	9.285	44.85	694	0.207023
INHS	1434	INHS1434	Agkistrodon piscivorus	Agkistrodon_piscivorus_INHS_1434	63	12	1	8.27	8.43	8.44	3.914	8.35	39.14	630	0.213337
INHS	1436	INHS1436	Agkistrodon piscivorus	Agkistrodon_piscivorus_INHS_1436	67	10.2	1	7.88	9.13	11.89	4.282	8.505	42.82	670	0.198622
INHS	1442	INHS1442	Agkistrodon piscivorus	Agkistrodon_piscivorus_INHS_1442	66.2	13.1	1	9.28	10.4	12.98	4.184	9.84	41.84	662	0.235182
INHS	1446	INHS1446	Agkistrodon piscivorus	Agkistrodon_piscivorus_INHS_1446	61.8	9.8	1	7.87	7.84	9.61	3.969	7.855	39.69	618	0.197909
INHS	1447	INHS1447	Agkistrodon piscivorus	Agkistrodon_piscivorus_INHS_1447	53.5	8.1	2	7.32	6.94	8.53	3.381	7.13	33.81	535	0.210884
INHS	1448	INHS1448	Agkistrodon piscivorus	Agkistrodon_piscivorus_INHS_1448	77.2	84	1	9.5	9.27	13.02	4.422	9.385	44.22	772	0.212234
INHS	1810	INHS1810	Agkistrodon piscivorus	Agkistrodon_piscivorus_INHS_1810	42.6	8.6	1	6.64	6.02	7.35	3.1	6.33	31	426	0.204194
INHS	1811	INHS1811	Agkistrodon piscivorus	Agkistrodon_piscivorus_INHS_1811	46.9	8	1	7.3	7.63	7.65	3.218	7.465	32.18	469	0.231976
INHS	3250	INHS3250	Agkistrodon piscivorus	Agkistrodon_piscivorus_INHS_3250	53	9	1	8.39	8.01	7.16	3.5	8.2	35	530	0.234286
INHS	3353	INHS3353	Agkistrodon piscivorus	Agkistrodon_piscivorus_INHS_3353	79.9	12	1	8.86	9.84	14.22	4.398	9.35	43.98	799	0.212597
INHS	4333	INHS4333	Agkistrodon piscivorus	Agkistrodon_piscivorus_INHS_4333	99.1	15.9		10.64	11.8	13.67	4.932	11.22	49.32	991	0.227494
INHS	4396	INHS4396	Agkistrodon piscivorus	Agkistrodon_piscivorus_INHS_4396	83.1	13.3	1	10.23	11.64	11.97	4.488	10.935	44.88	831	0.24365
INHS	8062	INHS8062	Agkistrodon piscivorus	Agkistrodon_piscivorus_INHS_8062	81.2	15.2	1	9.97	10.96	13.44	5.482	10.465	54.82	812	0.190897
MVZ	11115	MVZ11115	Agkistrodon piscivorus	Agkistrodon_piscivorus_MVZ_11115	62.5	9.5	1	8.62	7.97	12.1	3.882	8.295	38.82	625	0.213679
MVZ	246113	MVZ246113	Agkistrodon piscivorus	Agkistrodon_piscivorus_MVZ_246113	70.3	13.2	1	8.88	8.92	11.02	4.02	8.9	40.2	703	0.221393
MVZ	36608	MVZ36608	Agkistrodon piscivorus	Agkistrodon_piscivorus_MVZ_36608	47.2	9.1	2	8.02	7.6	7.95	3.288	7.81	32.88	472	0.23753
MVZ	44943	MVZ44943	Agkistrodon piscivorus	Agkistrodon_piscivorus_MVZ_44943	77	11.1	1	9.47	11.02	10.08	4.38	10.245	43.8	770	0.233904
MVZ	44945	MVZ44945	Agkistrodon piscivorus	Agkistrodon_piscivorus_MVZ_44945	60.9	9.5	2	7.96	8.19	11.02	3.687	8.075	36.87	609	0.219013
MVZ	44946	MVZ44946	Agkistrodon piscivorus	Agkistrodon_piscivorus_MVZ_44946	65.4	11	2	10.35	10.77	8.14	4.145	10.56	41.45	654	0.254765
MVZ	64701	MVZ64701	Agkistrodon piscivorus	Agkistrodon_piscivorus_MVZ_64701	81.3	12.5	1	10.96	11.2	10.5	4.547	11.08	45.47	813	0.243677
UTA	8117	UTA8117	Agkistrodon taylori	Agkistrodon_taylori_UTA_8117	55.9	11.5	1	9.02	9	7.12	3.285	9.01	32.85	559	0.274277
UTA	50140	UTA50140	Atheris broadleyi	Atheris_broadleyi_UTA_50140	60.5	12.1	1	5.01	4.95	8.21	3.455	4.98	34.55	605	0.144139
UTA	50141	UTA50141	Atheris broadleyi	Atheris_broadleyi_UTA_50141	57.5	11	2	7.03	7.27	5.57	2.931	7.15	29.31	575	0.243944
UTA	35480	UTA35480	Atheris ceratophora	Atheris_ceratophorus_UTA_35480	38.6	7.7	1	4.49	5.03	5.28	2.103	4.76	21.03	386	0.226343
MVZ	252434	MVZ252434	Atheris chlorechis	Atheris_chlorechis_MVZ_252434	45	8.3	1	6.21	5.95	5.62	2.223	6.08	22.23	450	0.273504
MVZ	252435	MVZ252435	Atheris chlorechis	Atheris_chlorechis_MVZ_252435	37.6	6.4	2	5.7	6.31	4.92	2.201	6.005	22.01	376	0.272831
UTA	9085	UTA9085	Atheris chlorechis	Atheris_chloroechis_UTA_9085	49.1	9	2	8.76	9.3	7.05	3.072	9.03	30.72	491	0.293945
UTA	50162	UTA50162	Atheris desaixi	Atheris_desaixi_UTA_50162	47	9.4	1	6.62	5.92	5.89	2.551	6.27	25.51	470	0.245786
UTA	31636	UTA31636	Atheris hispida	Atheris_hispidus_UTA_31636	52.4	12.5	2	4.99	5.28	4.83	2.261	5.135	22.61	524	0.227112
UTA	32139	UTA32139	Atheris nitschei	Atheris_nitschei_UTA_32139	51.5	8.1	2	9.09	10.46	5.87	3.009	9.775	30.09	515	0.324859
MVZ	220809	MVZ220809	Atheris squamigera	Atheris_squamigera_MVZ_220809	61.8	12	2	8.63	7.55	6.42	3.001	8.09	30.01	618	0.269577
UTA	46530	UTA46530	Atheris subocularis	Atheris_subocularis_UTA_46530	38.2	10	1	4.09	4.48	5.1	1.685	4.285	16.85	382	0.254303
UTA	51061	UTA51061	Proatheris superciliaris	Atheris_superciliaris_UTA_51061	37.2	8	1		4.6	4.73	2.152	4.6	21.52	372	0.213755
MVZ	267166	MVZ267166	Atropoides indomitus	Atropoides_indomitus_MVZ_267116	68.4	6.6	2	12.22	14.05	9.41	4.129	13.135	41.29	684	0.318116
MVZ	267168	MVZ267168	Atropoides mexicanus	Atropoides_mexicanus_MVZ_267168	46.1	5.9	1	11.93	12.37	8.08	3.938	12.15	39.38	461	0.308532
UIMNH	27842	UIMNH27842	Atropoides nummifer	Atropoides_mexicanus_UIMNH_27842	75.2	8.1	1	16.64	16.43	12.72	6.62	16.535	66.2	752	0.249773
UIMNH	27844	UIMNH27844	Atropoides nummifer	Atropoides_mexicanus_UIMNH_27844	69.4	8.2	1	11.9	10.71	10.87	5.308	11.305	53.08	694	0.21298
UIMNH	35535	UIMNH35535	Atropoides nummifer	Atropoides_mexicanus_UIMNH_35535	49.8	7.6	1	11.51	12.53	9.35	4.317	12.02	43.17	498	0.278434
UIMNH	35906	UIMNH35905	Atropoides nummifer	Atropoides_mexicanus_UIMNH_35906	39	46.1	1	8.5	7.77	8.46	2.737	8.135	27.37	390	0.297223
UIMNH	56845	UIMNH56845	Atropoides nummifer	Atropoides_mexicanus_UIMNH_56845	59.2	5.9	2	7.25	8.58	9.46	3.626	7.915	36.26	592	0.218285
UTA	26411	UTA26411	Atropoides mexicanus	Atropoides_mexicanus_UTA_26411	45.5	6.3	2		10.82	8.35	3.763	10.82	37.63	455	0.287537
UTA	26412	UTA26412	Atropoides mexicanus	Atropoides_mexicanus_UTA_26412	46.5	5.7	2	11.27	9.96	9.24	3.848	10.615	38.48	465	0.275858
UTA	30286	UTA30286	Atropoides mexicanus	Atropoides_mexicanus_UTA_30286	81.6	10.1	2	16.59	14.69	10.82	5.89	15.64	58.9	816	0.265535
UTA	30360	UTA30360	Atropoides mexicanus	Atropoides_mexicanus_UTA_30360	62.9	8.3	2	13.07	12.93	10.63	4.999	13	49.99	629	0.260052
UTA	46616	UTA46616	Atropoides mexicanus	Atropoides_mexicanus_UTA_46616	73.2	8.9	2	14.86	15.61	14.51	5.505	15.235	55.05	732	0.276748
UTA	5120	UTA5120	Atropoides mexicanus	Atropoides_mexicanus_UTA_5120	70.2	9	2	16.8	15.42	13.84	5.396	16.11	53.96	702	0.298554
UTA	6737	UTA6737	Atropoides mexicanus	Atropoides_mexicanus_UTA_6737	70	9	2	16.68	16.72	12.33	5.586	16.7	55.86	700	0.298962
UTA	6738	UTA6738	Atropoides mexicanus	Atropoides_mexicanus_UTA_6738	71.5	11.2	1	16.15	15.73	13.52	5.156	15.94	51.56	715	0.309154
CAS	163731	CAS163731	Atropoides mexicanus	Atropoides_nummifer_CAS_163731	38.5	5.5	1	5.65	6.9	4.7	2.817	6.275	28.17	385	0.222755
CAS	163771	CAS163771	Atropoides olmec	Atropoides_nummifer_CAS_163771	45.4	7.2	1	8.13	8.56	7.95	3.626	8.345	36.26	454	0.230143
CAS	163772	CAS163772	Atropoides olmec	Atropoides_nummifer_CAS_163772	60.2	8.6	1	11.61	12.59	10.88	5.053	12.1	50.53	602	0.239462
LACM	114152	LACM114152	Atropoides mexicanus	Atropoides_nummifer_LACM_114152	62.1	9	1	11.03	10.75	11.73	4.883	10.89	48.83	621	0.223019
LACM	154558	LACM154558	Atropoides nummifer	Atropoides_nummifer_LACM_154558	66.5	7.8	2	11.63	11.57	10.85	5.452	11.6	54.52	665	0.212766
LACM	154562	LACM154562	Atropoides mexicanus	Atropoides_nummifer_LACM_154562	62.8	7.7	1	13.96	12.47	10.6	5.27	13.215	52.7	628	0.250759
LACM	154563	LACM154563	Atropoides picadoi	Atropoides_nummifer_LACM_154563	70.2	9.6	2	13.37	12.72	15.17	5.491	13.045	54.91	702	0.237571
LACM	154564	LACM154564	Atropoides picadoi	Atropoides_nummifer_LACM_154564	46.8	6.3	1	12.13	11.59	9.34	4.775	11.86	47.75	468	0.248377
LACM	59199	LACM59199	Atropoides mexicanus	Atropoides_nummifer_LACM_59199	38.5	6	1	6.71	6.92	6.72	3.189	6.815	31.89	385	0.213703
MVZ	219559	MVZ219559	Atropoides mexicanus	Atropoides_nummifer_MVZ_219559	56.1	6.9	1	12.29	10.85	8.3	3.882	11.57	38.82	561	0.298042
UIMNH	35905	UIMNH35905	Atropoides nummifer	Atropoides_nummifer_UIMNH_35905	53.6	7.6	1	12.36	11.47	11.76	4.275	11.915	42.75	536	0.278713
UTA	12785	UTA12785	Atropoides occiduus	Atropoides_occiduus_UTA_12785	52	7.1	1	9.98	10.06	7.93	3.612	10.02	36.12	520	0.277409
UTA	21947	UTA21947	Atropoides occiduus	Atropoides_occiduus_UTA_21947	56.2	6.6	2	12.01	12.43	8.72	4.051	12.22	40.51	562	0.301654
UTA	21948	UTA21948	Atropoides occiduus	Atropoides_occiduus_UTA_21948	43.3	5.1	1	10.16	10.58	6.16	3.774	10.37	37.74	433	0.274775
UTA	21978	UTA21978	Atropoides occiduus	Atropoides_occiduus_UTA_21978	50.8	5.7	1	11.92	11.76	8.6	4.009	11.84	40.09	508	0.295335
UTA	24763	UTA24763	Atropoides occiduus	Atropoides_occiduus_UTA_24763	61.9	6.5	2	10.88	11.62	9.97	4.467	11.25	44.67	619	0.251847
UTA	29679	UTA29679	Atropoides occiduus	Atropoides_occiduus_UTA_29679	49	5.7	2	10.68		8	3.827	10.68	38.27	490	0.27907
UTA	34158	UTA34158	Atropoides occiduus	Atropoides_occiduus_UTA_34158	64.5	8.1	1	11.5	12.4	9.51	4.485	11.95	44.85	645	0.266444
UTA	34161	UTA34161	Atropoides occiduus	Atropoides_occiduus_UTA_34161	70.2	7.2	2	16.56	16.06	11.59	5.217	16.31	52.17	702	0.312632
UTA	6174	UTA6174	Atropoides occiduus	Atropoides_occiduus_UTA_6174	40.5	4.6	2	8.62	8.9	7.09	3.174	8.76	31.74	405	0.275992
UTA	9833	UTA9833	Atropoides occiduus	Atropoides_occiduus_UTA_9833	62.5	7.6	2	13.97	13.22	13.88	4.915	13.595	49.15	625	0.276602
UTA	16964	UTA16964	Atropoides olmec	Atropoides_olmec_UTA_16964	47.9	7.2	1	9.1	8.95	6.4	3.581	9.025	35.81	479	0.252025
UTA	22371	UTA22371	Atropoides olmec	Atropoides_olmec_UTA_22371	50.2	5.7	2	11.54	10.79	8.11	4.046	11.165	40.46	502	0.275952
UTA	25113	UTA25113	Atropoides olmec	Atropoides_olmec_UTA_25113	53	8	1	11.71	11.72	10.52	4.404	11.715	44.04	530	0.266008
LACM	154546	LACM154546	Atropoides picadoi	Atropoides_picadoi_LACM_154546	89.3	9.2	1	14.28		11.33	6.159	14.28	61.59	893	0.231856
LACM	154547	LACM154547	Atropoides picadoi	Atropoides_picadoi_LACM_154547	59.7	6.6	2	9.97		8.82	4.332	9.97	43.32	597	0.230148
LACM	154548	LACM154548	Atropoides picadoi	Atropoides_picadoi_LACM_154548	49.7	5.9	1	8.44	8.61	7.89	3.84	8.525	38.4	497	0.222005
UTA	18215	UTA18215	Atropoides picadoi	Atropoides_picadoi_UTA_18215	90.8	10.6	1	17.23	16.27	12.91	5.639	16.75	56.39	908	0.297038
UTA	24820	UTA24820	Atropoides picadoi	Atropoides_picadoi_UTA_24820	85.9	8.4	2	15.7	15.63	14.98	5.692	15.665	56.92	859	0.275211
UTA	24821	UTA24821	Atropoides picadoi	Atropoides_picadoi_UTA_24821	86	9.4	1	16.32	15.37	11.96	5.465	15.845	54.65	860	0.289936
UTA	24834	UTA24834	Atropoides picadoi	Atropoides_picadoi_UTA_24834	87.5	11	1	16.58	15.4	12.22	5.808	15.99	58.08	875	0.27531
UTA	24835	UTA24835	Atropoides picadoi	Atropoides_picadoi_UTA_24835	86.2	11.4	1	15.25	15.67	13.01	5.473	15.46	54.73	862	0.282478
UTA	24836	UTA24836	Atropoides picadoi	Atropoides_picadoi_UTA_24836	82.3	8	1	15.28	15.83	13.44	5.668	15.555	56.68	823	0.274435
UTA	32080	UTA32080	Atropoides picadoi	Atropoides_picadoi_UTA_32080	93.2	11	1	14.57	14.73	11.6	5.551	14.65	55.51	932	0.263916
MVZ	206178	MVZ206178	Azemiops feae	Azemiops_faea_MVZ_206178	31.2	5.6	2	3.19	3.01	3.41	1.43	3.1	14.3	312	0.216783
MVZ	229995	MVZ229995	Azemiops feae	Azemiops_faea_MVZ_229995	39.6	8.2	1	4.22	4.17	5.19	1.85	4.195	18.5	396	0.226757
UTA	18701	UTA18701	Azemiops feae	Azemiops_feae_UTA_18701	54.5	9.3	1	4.63	4.45	5.61	1.767	4.54	17.67	545	0.256933
UTA	18702	UTA18702	Azemiops feae	Azemiops_feae_UTA_18702	50	8.4	1	4.39	4.42	3.7	1.759	4.405	17.59	500	0.250426
UTA	32069	UTA32069	Azemiops feae	Azemiops_feae_UTA_32069	51.8	9.1	1	3.96	4.17	4.94	2.036	4.065	20.36	518	0.199656
MVZ	176500	MVZ176500	Bitis arietans	Bitis_arietans_MVZ_176500	77	5	2	14.41	16.2	12	5.088	15.305	50.88	770	0.300806
MVZ	265905	MVZ265905	Bitis arietans	Bitis_arietans_MVZ_265905	78	11	1	14.61	15.19	14.44	4.804	14.9	48.04	780	0.310158
MVZ	265906	MVZ265906	Bitis arietans	Bitis_arietans_MVZ_265906	53	3	2	12.27	11.83	7.61	3.3	12.05	33	530	0.365152
MVZ	265907	MVZ265907	Bitis arietans	Bitis_arietans_MVZ_265907	50.5	5.3	2	9.44	9.79	8.38	3.139	9.615	31.39	505	0.306308
MVZ	65332	MVZ65332	Bitis arietans	Bitis_arietans_MVZ_65332	90.2	6.8	1	18.44	19.84	14.27	5.603	19.14	56.03	902	0.341603
MVZ	65333	MVZ65333	Bitis arietans	Bitis_arietans_MVZ_65333	72.8	13	1	13.66	14.44	12.03	4.682	14.05	46.82	728	0.300085
MVZ	65341	MVZ65341	Bitis arietans	Bitis_arietans_MVZ_65341	96.5	6	2	16.94	17.95	13.83	5.365	17.445	53.65	965	0.325163
MVZ	68118	MVZ68118	Bitis arietans	Bitis_arietans_MVZ_68118	91.3	7	1	17.75	17.75	16.41	5.275	17.75	52.75	913	0.336493
UTA	32082	UTA32082	Bitis atropos	Bitis_atropos_UTA_32082	50.4	4.3		10.24	10.27	8.29	3.605	10.255	36.05	504	0.284466
MVZ	238682	MVZ238682	Bitis caudalis	Bitis_caudalis_MVZ_238682	36	3.2	2	8.24	7.78	6.02	2.397	8.01	23.97	360	0.334168
MVZ	65348	MVZ65348	Bitis caudalis	Bitis_caudalis_MVZ_65348	25.1	3.2	1	6.54	6.4	4.9	1.92	6.47	19.2	251	0.336979
MVZ	65349	MVZ65349	Bitis caudalis	Bitis_caudalis_MVZ_65349	27.9	3.3	2	6.31	7.32	5.5	2.306	6.815	23.06	279	0.295533
MVZ	65350	MVZ65350	Bitis caudalis	Bitis_caudalis_MVZ_65350	32.5	3	1	7.24	7.83	6.21	2.307	7.535	23.07	325	0.326615
MVZ	65351	MVZ65351	Bitis caudalis	Bitis_caudalis_MVZ_65351	27.9	2	2	5.68	5.24	4.89	2.096	5.46	20.96	279	0.260496
UTA	32566	UTA32566	Bitis cornuta	Bitis_cornuta_UTA_32566	40.2	3.3	2	7.36	7.54	6.94	2.627	7.45	26.27	402	0.283593
UTA	32567	UTA32567	Bitis cornuta	Bitis_cornuta_UTA_32567	38.1	4.1	1	6.2	6.84	7.43	2.555	6.52	25.55	381	0.255186
MVZ	238683	MVZ238683	Bitis cornuta	Bitis_cornutus_MVZ_238683	27.8	3.3	1	6.23	5.55	5.36	2.097	5.89	20.97	278	0.280877
MVZ	191876	MVZ191876	Bitis gabonica	Bitis_gabonica_MVZ_191876	85.5	11	1		22	19.35	7.411	22	74.11	855	0.296856
MVZ	81444	MVZ81444	Bitis rhinoceros	Bitis_gabonica_MVZ_81444	56	5.2	1	14.95	15.07	10.95	4.21	15.01	42.1	560	0.356532
MVZ	81445	MVZ81445	Bitis rhinoceros	Bitis_gabonica_MVZ_81445	80.3	9.4	1	18.68	19.27	18.47	6.32	18.975	63.2	803	0.300237
MVZ	57925	MVZ57925	Bitis nasicornis	Bitis_nasicornis_MVZ_57925	91.4	10.1	1	18.29	18.29	15.12	5.387	18.29	53.87	914	0.339521
MVZ	81446	MVZ81446	Bitis nasicornis	Bitis_nasicornis_MVZ_81446	68.8	10	1	13.08	14.14	12.28	4.456	13.61	44.56	688	0.305431
MVZ	81447	MVZ81447	Bitis nasicornis	Bitis_nasicornis_MVZ_81447	41.1	5.1	1	10.51	10.69	7.76	3.309	10.6	33.09	411	0.320338
MVZ	81448	MVZ81448	Bitis nasicornis	Bitis_nasicornis_MVZ_81448	45.5	3.3	1	9.59	10.93	8.66	3.569	10.26	35.69	455	0.287475
MVZ	229324	MVZ229324	Bitis peringueyi	Bitis_peringueyi_MVZ_229324	31.2	2	1	4.69	4.35	4.69	1.629	4.52	16.29	312	0.277471
MVZ	229326	MVZ229326	Bitis peringueyi	Bitis_peringueyi_MVZ_229326	24.8	1.6	2	3.59	3.75	4.38	1.401	3.67	14.01	248	0.261956
MVZ	238684	MVZ238684	Bitis peringueyi	Bitis_peringueyi_MVZ_238684	28.5	2	1	3.31	2.99	5.82	1.548	3.15	15.48	285	0.203488
UF	61618		Bitis rhinoceros	Bitis_rhinoceros_UF_61618	112.5	15.5	1	28.87	26.45	25.78	9.371	27.66	93.71	1125	0.295166
MVZ	238685	MVZ238685	Bitis schneideri	Bitis_schneideri_MVZ_238685	23	2.1	2	4.65	3.95	5.15	1.877	4.3	18.77	230	0.229089
MVZ	238686	MVZ238686	Bitis schneideri	Bitis_schneideri_MVZ_238686	21.1	2.2	1	4.22	4.21	4.92	1.607	4.215	16.07	211	0.26229
MVZ	238688	MVZ238688	Bitis schneideri	Bitis_schneideri_MVZ_238688	21.3	2.7	1	4.31	4.96	4.59	1.556	4.635	15.56	213	0.297879
UF	119877		Bitis worthingtoni	Bitis_worthingtoni_UF_119877	18.5	1.8	1	3.31	3.7	3.17	1.487	3.505	14.87	185	0.235709
UTA	60303	UTA60303	Bothriechis guifarroi	Bothiechis_guifarroi_UTA_60303	61	13.8	1	8.49	8.8	5.19	2.897	8.645	28.97	610	0.298412
CAS	67049	CAS67049	Bothriechis aurifer	Bothriechis_aurifer_CAS_67049	67.8	13.8	2	12.2	12.27	9.51	3.884	12.235	38.84	678	0.31501
MVZ	201398	MVZ201398	Bothriechis aurifer	Bothriechis_aurifer_MVZ_201398	73.1	16	1	10.01	9.99	9.12	3.567	10	35.67	731	0.280348
UIMNH	53069	UIMNH53069	Bothriechis aurifer	Bothriechis_aurifer_UIMNH_53069	48.2	9.2	1	5.37	6.43	6.59	2.488	5.9	24.88	482	0.237138
UIMNH	56121	UIMNH56121	Bothriechis aurifer	Bothriechis_aurifer_UIMNH_56121	58.3	11.5	1	7.73	8.86	6.53	2.914	8.295	29.14	583	0.28466
UTA	4494	UTA4494	Bothriechis aurifer	Bothriechis_aurifer_UTA_4494	56.5	12	1	5.81	7.09	9.68	2.96	6.45	29.6	565	0.217905
UTA	52277	UTA52277	Bothriechis aurifer	Bothriechis_aurifer_UTA_52277	64	14	1	11.12	11.72	7.04	3.98	11.42	39.8	640	0.286935
UTA	6504	UTA6504	Bothriechis aurifer	Bothriechis_aurifer_UTA_6504	58.6	10.6	2	9.94	9.02	7.64	3.446	9.48	34.46	586	0.275102
UTA	6525	UTA6525	Bothriechis aurifer	Bothriechis_aurifer_UTA_6525	65	15	1	10.13	10.19	7.5	3.159	10.16	31.59	650	0.321621
UTA	6562	UTA6562	Bothriechis aurifer	Bothriechis_aurifer_UTA_6562	52	11.2	2	7.85	7.43	7.6	2.926	7.64	29.26	520	0.261107
UTA	7039	UTA7039	Bothriechis aurifer	Bothriechis_aurifer_UTA_7039	63.8	72.9	1	10.87	10.06	8.42	3.618	10.465	36.18	638	0.289248
UTA	7042	UTA7042	Bothriechis aurifer	Bothriechis_aurifer_UTA_7042	51.6	9.5	2	6.94	7.19	5.99	2.685	7.065	26.85	516	0.263128
UTA	7043	UTA7043	Bothriechis aurifer	Bothriechis_aurifer_UTA_7043	63.4	11.3	1	12.2	13.1	8.63	3.799	12.65	37.99	634	0.332982
UTA	7762	UTA7762	Bothriechis aurifer	Bothriechis_aurifer_UTA_7762	64.8	14.8	1	9.16	9.28	8.01	3.303	9.22	33.03	648	0.27914
UTA	7764	UTA7764	Bothriechis aurifer	Bothriechis_aurifer_UTA_7764	52.5	9.7	2	8.69	8.4	7.24	2.864	8.545	28.64	525	0.298359
UTA	7767	UTA7767	Bothriechis aurifer	Bothriechis_aurifer_UTA_7767	42.1	8.6	1	4.75	4.17	5.34	2.286	4.46	22.86	421	0.195101
MVZ	159460	MVZ159460	Bothriechis bicolor	Bothriechis_bicolor_MVZ_159460	66.6	11.4	2	11.98	11.56	8.05	3.787	11.77	37.87	666	0.3108
UTA	24759	UTA24759	Bothriechis bicolor	Bothriechis_bicolor_UTA_24759	62.3	14.2	1	8.48	9.01	7.22	2.767	8.745	27.67	623	0.316046
UTA	31977	UTA31977	Bothriechis bicolor	Bothriechis_bicolor_UTA_31977	78.5	18.5	1	13.33	13.21	7.92	4.103	13.27	41.03	785	0.323422
UTA	34535	UTA34535	Bothriechis bicolor	Bothriechis_bicolor_UTA_34535	82	17.6	1	13.85	14.29	9.16	4.229	14.07	42.29	820	0.332703
UTA	39414	UTA39414	Bothriechis bicolor	Bothriechis_bicolor_UTA_39414	40.6	8.3	2	6.29	6.29	6.26	2.638	6.29	26.38	406	0.238438
UTA	39418	UTA39418	Bothriechis bicolor	Bothriechis_bicolor_UTA_39418	69.2	14.1	1	11.17	11.64	8.49	4.118	11.405	41.18	692	0.276955
UTA	42273	UTA42273	Bothriechis bicolor	Bothriechis_bicolor_UTA_42273	51	11.2	1	7.41	6.51	6.38	2.661	6.96	26.61	510	0.261556
UTA	42274	UTA42274	Bothriechis bicolor	Bothriechis_bicolor_UTA_42274	54.8	13.2	1	7.38	7.51	6.97	2.875	7.445	28.75	548	0.258957
UTA	42276	UTA42276	Bothriechis bicolor	Bothriechis_bicolor_UTA_42276	54.8	10.5	1	8.33	7.65	6.71	2.692	7.99	26.92	548	0.296805
UTA	42277	UTA42277	Bothriechis bicolor	Bothriechis_bicolor_UTA_42277	49.8	11	2	8.61	8.36	7.25	2.842	8.485	28.42	498	0.298557
UTA	42278	UTA42278	Bothriechis bicolor	Bothriechis_bicolor_UTA_42278	49.5	10.6	1	8.04	8.41	6.87	2.875	8.225	28.75	495	0.286087
UTA	42279	UTA42279	Bothriechis bicolor	Bothriechis_bicolor_UTA_42279	48	10.6	1	5.76		6.31	2.579	5.76	25.79	480	0.223342
CAS	13316	CAS13316	Bothrops bilineatus	Bothriechis_bilineatus_CAS_13316	43.3	9.2	2	7.76	8.51	7.76	2.89	8.135	28.9	433	0.281488
MVZ	269305	MVZ269305	Bothriechis guifarroi	Bothriechis_guifarroi_MVZ_269305	52.5	12	1	6	6.89	6.61	2.768	6.445	27.68	525	0.23284
CAS	79030	CAS79030	Bothriechis lateralis	Bothriechis_lateralis_CAS_79030	45.7	7.6	1	6	5.5	4.67	2.485	5.75	24.85	457	0.231388
CAS	79031	CAS79031	Bothriechis lateralis	Bothriechis_lateralis_CAS_79031	46.1	8.6	1	5.53	5.87	6.17	2.551	5.7	25.51	461	0.223442
LACM	154572	LACM154572	Bothriechis lateralis	Bothriechis_lateralis_LACM_154572	68.3	15.3	1	9.02	9.9	7.76	3.712	9.46	37.12	683	0.254849
LACM	154575	LACM154575	Bothriechis lateralis	Bothriechis_lateralis_LACM_154575	71	17.5	1	6.87	7.96	5.79	3.343	7.415	33.43	710	0.221807
LACM	154576	LACM154576	Bothriechis lateralis	Bothriechis_lateralis_LACM_154576	59.2	13.2	1	6.55	6.28	4.99	2.901	6.415	29.01	592	0.221131
LACM	154577	LACM154577	Bothriechis lateralis	Bothriechis_lateralis_LACM_154577	62.3	13.6	1	6.25	6.43	5.89	2.929	6.34	29.29	623	0.216456
LACM	154578	LACM154578	Bothriechis lateralis	Bothriechis_lateralis_LACM_154578	61	13.5	2	6.83	6.23	6.27	2.833	6.53	28.33	610	0.230498
LACM	154579	LACM154579	Bothriechis lateralis	Bothriechis_lateralis_LACM_154579	56.3	12.7	2	6.53	7.26	5.66	2.629	6.895	26.29	563	0.262267
LACM	154580	LACM154580	Bothriechis lateralis	Bothriechis_lateralis_LACM_154580	58.2	12	1	7.56	6.57	6.06	2.83	7.065	28.3	582	0.249647
LACM	154581	LACM154581	Bothriechis lateralis	Bothriechis_lateralis_LACM_154581	56.5	11.5	1	8.1	8.53	6.2	3.25	8.315	32.5	565	0.255846
LACM	154582	LACM154582	Bothriechis lateralis	Bothriechis_lateralis_LACM_154582	59.6	11.2	2	6.71	6.73	6.63	2.98	6.72	29.8	596	0.225503
MVZ	207372	MVZ207372	Bothriechis lateralis	Bothriechis_lateralis_MVZ_207372	80.7	14.6	1	13.01	14.33	8.06	3.658	13.67	36.58	807	0.373701
MVZ	207373	MVZ207373	Bothriechis lateralis	Bothriechis_lateralis_MVZ_207373	69.4	13.4	1	9.24	8.71	6.64	2.881	8.975	28.81	694	0.311524
MVZ	207374	MVZ207374	Bothriechis lateralis	Bothriechis_lateralis_MVZ_207374	52.6	9.9	1	6.97	7.15	6.52	2.513	7.06	25.13	526	0.280939
MVZ	207375	MVZ207375	Bothriechis lateralis	Bothriechis_lateralis_MVZ_207375	59.1	10.8	2	9.08	9.88	6.06	2.915	9.48	29.15	591	0.325214
MVZ	207378	MVZ207378	Bothriechis lateralis	Bothriechis_lateralis_MVZ_207378	67	14	1	9.78	10.14	6.22	3.214	9.96	32.14	670	0.309894
MVZ	207747	MVZ207747	Bothriechis lateralis	Bothriechis_lateralis_MVZ_207747	46.5	9	1	7.2	6.92	5.78	2.396	7.06	23.96	465	0.294658
UTA	14602	UTA14602	Bothriechis lateralis	Bothriechis_lateralis_UTA_14602	76.5	16	1	10.5	10.17	9.59	3.767	10.335	37.67	765	0.274356
UTA	16071	UTA16071	Bothriechis lateralis	Bothriechis_lateralis_UTA_16071	51.9	10.7	2	7.36	7.26	5.22	2.711	7.31	27.11	519	0.269642
UTA	16073	UTA16073	Bothriechis lateralis	Bothriechis_lateralis_UTA_16073	60	13.6	1	9.71	9.3	5.6	3.011	9.505	30.11	600	0.315676
UTA	16074	UTA16074	Bothriechis lateralis	Bothriechis_lateralis_UTA_16074	61.4	14.3	1	10.54	9.81	5.33	3.207	10.175	32.07	614	0.317275
UTA	16351	UTA16351	Bothriechis lateralis	Bothriechis_lateralis_UTA_16351	79	19.3	1	11.39	11.4	6.75	3.524	11.395	35.24	790	0.323354
UTA	13034	UTA13034	Bothriechis marchi	Bothriechis_marchi_UTA_13034	66.5	15	1	9.76	9.97	6.23	3.368	9.865	33.68	665	0.292904
UTA	13617	UTA13617	Bothriechis marchi	Bothriechis_marchi_UTA_13617	68.8	15.6	1	9.56	10.19	8.25	3.428	9.875	34.28	688	0.288069
UTA	13618	UTA13618	Bothriechis marchi	Bothriechis_marchi_UTA_13618	62.5	13.5	1	10.87	10.5	7.76	3.544	10.685	35.44	625	0.301495
UTA	16068	UTA16068	Bothriechis marchi	Bothriechis_marchi_UTA_16068	64.1	16.3	1	9.66	8.62	8.5	3.228	9.14	32.28	641	0.283147
UTA	17907	UTA17907	Bothriechis marchi	Bothriechis_marchi_UTA_17907	66.5	15.6	2	11.83	11.1	8	3.767	11.465	37.67	665	0.304354
UTA	21849	UTA21849	Bothriechis marchi	Bothriechis_marchi_UTA_21849	61.8	13.5	1	9.13	9.08	6.12	3.148	9.105	31.48	618	0.289231
UTA	24760	UTA24760	Bothriechis marchi	Bothriechis_marchi_UTA_24760	51.3	10.7	2	8.92	8.3	7.04	2.811	8.61	28.11	513	0.306297
UTA	24761	UTA24761	Bothriechis marchi	Bothriechis_marchi_UTA_24761	64.3	15	2	10.78	11.36	7.39	3.415	11.07	34.15	643	0.324158
UTA	32068	UTA32068	Bothriechis marchi	Bothriechis_marchi_UTA_32068	64	16.3	1	9.27	8.6	6.76	3.254	8.935	32.54	640	0.274585
CAS	178120	CAS178120	Bothriechis nigroviridis	Bothriechis_nigroviridis_CAS_178120	43.4	9.6	1	4.19	4.79	5.47	2.44	4.49	24.4	434	0.184016
LACM	154552	LACM154552	Bothriechis nigroviridis	Bothriechis_nigroviridis_LACM_154552	43.8	8.4	2	5.09	5.07	4.87	2.321	5.08	23.21	438	0.218871
LACM	154553	LACM154553	Bothriechis nigroviridis	Bothriechis_nigroviridis_LACM_154553	43.3	9.2	1	4.18	4.3	5.7	2.299	4.24	22.99	433	0.184428
LACM	154554	LACM154554	Bothriechis nigroviridis	Bothriechis_nigroviridis_LACM_154554	45	9.2	1	4.1	3.8	5.4	2.403	3.95	24.03	450	0.164378
UTA	14058	UTA14058	Bothriechis nigroviridis	Bothriechis_nigroviridis_UTA_14058	72.8	15	1	12.6		7.85	4.28	12.6	42.8	728	0.294393
UTA	22523	UTA22523	Bothriechis nigroviridis	Bothriechis_nigroviridis_UTA_22523	66.1	14.4	1	11.07	11.62	7.22	3.526	11.345	35.26	661	0.321753
UTA	10433	UTA10433	Bothriechis nubestris	Bothriechis_nubestris_UTA_10433	52	11.2	1	7.77	7.4	6.25	2.746	7.585	27.46	520	0.27622
UTA	2850	UTA2850	Bothriechis nubestris	Bothriechis_nubestris_UTA_2850	48.3		1	6.4	6.48	6.22	2.921	6.44	29.21	483	0.220472
UTA	7463	UTA7463	Bothriechis nubestris	Bothriechis_nubestris_UTA_7463	60.6	11.2	2	11.59	11.25	7.97	3.492	11.42	34.92	606	0.327033
UTA	9637	UTA9637	Bothriechis nubestris	Bothriechis_nubestris_UTA_9637	70.1	13.9	2	12.51	12.78	7.29	3.695	12.645	36.95	701	0.342219
CAS	163753	CAS163753	Bothriechis rowleyi	Bothriechis_rowleyi_CAS_163753	54.8	10.6	2	7.29	7.5	6.12	2.818	7.395	28.18	548	0.26242
UIMNH	27845	UIMNH27845	Bothriechis rowleyi	Bothriechis_rowleyi_UIMNH_27845	56	10	1	7.05	7.31	7.64	3.092	7.18	30.92	560	0.232212
UTA	13619	UTA13619	Bothriechis rowleyi	Bothriechis_rowleyi_UTA_13619	72	16.7	1	10.14	9.94	8.94	3.359	10.04	33.59	720	0.298898
UTA	22243	UTA22243	Bothriechis rowleyi	Bothriechis_rowleyi_UTA_22243	77.7	18.2	1	10.05	9.89	7.6	3.781	9.97	37.81	777	0.263687
UTA	23954	UTA23954	Bothriechis rowleyi	Bothriechis_rowleyi_UTA_23954	78.4	17.5	1	9.35	9.54	6.97	3.44	9.445	34.4	784	0.274564
UTA	25703	UTA25703	Bothriechis rowleyi	Bothriechis_rowleyi_UTA_25703	73.3	17.6	1	9.71	10.56	6.51	3.458	10.135	34.58	733	0.293088
UTA	6207	UTA6207	Bothriechis rowleyi	Bothriechis_rowleyi_UTA_6207	71.2	16.4	1	11.85	10.31	7.15	3.483	11.08	34.83	712	0.318117
UTA	6636	UTA6636	Bothriechis rowleyi	Bothriechis_rowleyi_UTA_6636	57	14	1	9.55	9.03	5.5	2.955	9.29	29.55	570	0.314382
UTA	7709	UTA7709	Bothriechis rowleyi	Bothriechis_rowleyi_UTA_7709	54.5	12.6	2	7.31	7.4	6.48	2.729	7.355	27.29	545	0.269513
LACM	154672	LACM154672	Bothriechis schlegelii	Bothriechis_schlegelii_LACM_154672	59.5	11	1	10.05	9.54	7.8	3.708	9.795	37.08	595	0.264159
LACM	154673	LACM154673	Bothriechis schlegelii	Bothriechis_schlegelii_LACM_154673	68.2	11.8	1	11.05	11.55	9.5	4.394	11.3	43.94	682	0.257169
LACM	154676	LACM154676	Bothriechis schlegelii	Bothriechis_schlegelii_LACM_154676	45.5	8.2	2	8.32	8.2	6.74	2.973	8.26	29.73	455	0.277834
LACM	154677	LACM154677	Bothriechis schlegelii	Bothriechis_schlegelii_LACM_154677	42.1	7.2	2	6.05	6.72	6.71	2.833	6.385	28.33	421	0.225379
LACM	154678	LACM154678	Bothriechis schlegelii	Bothriechis_schlegelii_LACM_154678	38.2	7.4	1	3.6	4.29	4.64	1.871	3.945	18.71	382	0.21085
LACM	154680	LACM154680	Bothriechis schlegelii	Bothriechis_schlegelii_LACM_154680	36	6.3	2	5.08	5.19	6.26	2.342	5.135	23.42	360	0.219257
LACM	154681	LACM154681	Bothriechis schlegelii	Bothriechis_schlegelii_LACM_154681	35.8	7	1	5.44	5.74	5.89	2.472	5.59	24.72	358	0.226133
LACM	154683	LACM154683	Bothriechis schlegelii	Bothriechis_schlegelii_LACM_154683	47.8	7.8	2	7.75	7.14	7.54	3.029	7.445	30.29	478	0.245791
LACM	154684	LACM154684	Bothriechis schlegelii	Bothriechis_schlegelii_LACM_154684	48	7.4	2	7.92	8.09	6.67	3.296	8.005	32.96	480	0.24287
LACM	154685	LACM154685	Bothriechis schlegelii	Bothriechis_schlegelii_LACM_154685	36.6	7	1	4	3.98	5.29	2.331	3.99	23.31	366	0.171171
LACM	154692	LACM154692	Bothriechis schlegelii	Bothriechis_schlegelii_LACM_154692	60.2	10.4	1	9.5	9.14	7.73	3.804	9.32	38.04	602	0.245005
LACM	154693	LACM154693	Bothriechis schlegelii	Bothriechis_schlegelii_LACM_154693	56.4	11.3	1	9.55	9.79	10.07	4.04	9.67	40.4	564	0.239356
LACM	154694	LACM154694	Bothriechis schlegelii	Bothriechis_schlegelii_LACM_154694	54.8	9.6	2	9.29	9.09	8.13	3.725	9.19	37.25	548	0.246711
LACM	154695	LACM154695	Bothriechis schlegelii	Bothriechis_schlegelii_LACM_154695	49.5	9	2		8.01	6.07	3.12	8.01	31.2	495	0.256731
LACM	154702	LACM154702	Bothriechis schlegelii	Bothriechis_schlegelii_LACM_154702	49.5	8.4	1	7.28	8.59	7.63	2.765	7.935	27.65	495	0.28698
LACM	154703	LACM154703	Bothriechis schlegelii	Bothriechis_schlegelii_LACM_154703	45	6.6	2	7.26	7.37	6.78	2.946	7.315	29.46	450	0.248303
LACM	154704	LACM154704	Bothriechis schlegelii	Bothriechis_schlegelii_LACM_154704	41.6	7.4	1	5.55	6.15	6.03	2.747	5.85	27.47	416	0.21296
LACM	154705	LACM154705	Bothriechis schlegelii	Bothriechis_schlegelii_LACM_154705	37.2	6.3	2	4.39	4.64	5.86	2.312	4.515	23.12	372	0.195285
LACM	154706	LACM154706	Bothriechis schlegelii	Bothriechis_schlegelii_LACM_154706	38.6	8	1	5.38	5.39	5.77	2.18	5.385	21.8	386	0.247018
LACM	154747	LACM154747	Bothriechis schlegelii	Bothriechis_schlegelii_LACM_154747	58.5	11.1	2	8.61	8.8	7.11	3.616	8.705	36.16	585	0.240736
LACM	154748	LACM154748	Bothriechis schlegelii	Bothriechis_schlegelii_LACM_154748	59.2	10.3	1	9.68	9.46	7.25	3.844	9.57	38.44	592	0.248959
LACM	154750	LACM154750	Bothriechis schlegelii	Bothriechis_schlegelii_LACM_154750	55.5	10.6	1	11.94	10.73	6.82	3.758	11.335	37.58	555	0.301623
LACM	154751	LACM154751	Bothriechis schlegelii	Bothriechis_schlegelii_LACM_154751	52.6	9.3	1	8.49	7.52	5.15	3.338	8.005	33.38	526	0.239814
LACM	154752	LACM154752	Bothriechis schlegelii	Bothriechis_schlegelii_LACM_154752	55	9.1	2	7.82	8.11	6.49	3.337	7.965	33.37	550	0.238687
LACM	154755	LACM154755	Bothriechis schlegelii	Bothriechis_schlegelii_LACM_154755	46.6	9.5	1	7.36	7.29	7.15	2.982	7.325	29.82	466	0.245641
LACM	154757	LACM154757	Bothriechis schlegelii	Bothriechis_schlegelii_LACM_154757	42.8	7.3	1	6.18	6.14	5.7	3.042	6.16	30.42	428	0.202498
LACM	72754	LACM72754	Bothriechis schlegelii	Bothriechis_schlegelii_LACM_72754	39.8	8	1	5.03	4.79	6.36	2.698	4.91	26.98	398	0.181987
MVZ	204271	MVZ204271	Bothriechis schlegelii	Bothriechis_schlegelii_MVZ_204271	36.9	8.1	1	5.94	6.53	7.12	2.479	6.235	24.79	369	0.251513
MVZ	207749	MVZ207749	Bothriechis schlegelii	Bothriechis_schlegelii_MVZ_207749	62	10.5	2	11.96	11.18	8.31	3.778	11.57	37.78	620	0.306247
MVZ	229776	MVZ229776	Bothriechis schlegelii	Bothriechis_schlegelii_MVZ_229776	64.4	11.5	2	11.71	11.63	9.59	3.842	11.67	38.42	644	0.303748
MVZ	229777	MVZ229777	Bothriechis schlegelii	Bothriechis_schlegelii_MVZ_229777	64.7	10	2	11.52	11.4	9.09	3.921	11.46	39.21	647	0.292272
MVZ	229778	MVZ229778	Bothriechis schlegelii	Bothriechis_schlegelii_MVZ_229778	52.4	8.8	2	8.08	8.5	6.9	2.986	8.29	29.86	524	0.277629
MVZ	35571	MVZ35571	Bothriechis schlegelii	Bothriechis_schlegelii_MVZ_35571	35.1	6.6	1	5.73	5.24	5.38	2.079	5.485	20.79	351	0.263829
MVZ	35573	MVZ35573	Bothriechis schlegelii	Bothriechis_schlegelii_MVZ_35573	31.6	6	2	6.71	7.13	5.74	2.503	6.92	25.03	316	0.276468
MVZ	35574	MVZ35574	Bothriechis schlegelii	Bothriechis_schlegelii_MVZ_35574	44.2	7.2	1	7.94	7.62	6.7	2.975	7.78	29.75	442	0.261513
MVZ	35575	MVZ35575	Bothriechis schlegelii	Bothriechis_schlegelii_MVZ_35575	42.6	8.1	2	8.31	7.92	7.58	3.013	8.115	30.13	426	0.269333
MVZ	35578	MVZ35578	Bothriechis schlegelii	Bothriechis_schlegelii_MVZ_35578	44.3	9.3	1	8.5	8.2	8.07	3.215	8.35	32.15	443	0.25972
MVZ	68689	MVZ68689	Bothriechis schlegelii	Bothriechis_schlegelii_MVZ_68689	51.2	8.9	2	9.1	8.02	8.6	3.17	8.56	31.7	512	0.270032
MVZ	80029	MVZ80029	Bothriechis schlegelii	Bothriechis_schlegelii_MVZ_80029	38.6	6.3	1	6.2	6.59	5.95	2.324	6.395	23.24	386	0.275172
CAS	21063	CAS21063	Bothriechis schlegelii	Bothriechis_schlegelli_CAS_21063	28.4	5.5	2	4.16	4.39	3.38	1.855	4.275	18.55	284	0.230458
UTA	30289	UTA30289	Bothriechis supraciliaris	Bothriechis_supraciliaris_UTA_30289	31.1	5.7	1	4.59	5.5	5.04	2.162	5.045	21.62	311	0.233349
UTA	35193	UTA35193	Bothriechis supraciliaris	Bothriechis_supraciliaris_UTA_35193	47.5	9.5	1	9.66	9.53	7.45	3.189	9.595	31.89	475	0.300878
UTA	38891	UTA38891	Bothriechis thalassinus	Bothriechis_thalassinus_UTA_38891	53.1	11.5	2		9.12	6.55	2.785	9.12	27.85	531	0.327469
UTA	42259	UTA42259	Bothriechis thalassinus	Bothriechis_thalassinus_UTA_42259	66.4	14.8	1	11.35	10.85	7.07	3.025	11.1	30.25	664	0.366942
UTA	44438	UTA44438	Bothriechis thalassinus	Bothriechis_thalassinus_UTA_44438	71.3	17.5	1	11.13	11.83	8.51	3.501	11.48	35.01	713	0.327906
UTA	39066	UTA39066	Bothrops pulchra	Bothriopsis_albocarinata_UTA_39066	72.3	11.5	1	10.87	11.14	8.84	2.993	11.005	29.93	723	0.367691
UTA	16084	UTA16084	Bothrops bilineatus	Bothriopsis_bilineata_UTA_16084	66.7	10.6	1	11.06	10.11	6.91	3.214	10.585	32.14	667	0.32934
UTA	19490	UTA19490	Bothrops bilineatus	Bothriopsis_bilineata_UTA_19490	57.4	8.5	2	9.56	9.86	5.32	2.824	9.71	28.24	574	0.343839
UTA	22581	UTA22581	Bothrops bilineatus	Bothriopsis_bilineata_UTA_22581	79.8	13.9	1	10.1	8.84	5.99	3.259	9.47	32.59	798	0.29058
UTA	2468	UTA2468	Bothrops bilineatus	Bothriopsis_bilineata_UTA_2468	61.6	10.3	1	8.98	8.66	5.88	2.902	8.82	29.02	616	0.303928
UTA	34144	UTA34144	Bothrops bilineatus	Bothriopsis_bilineata_UTA_34144	65.1	10.7	1	9.95		7.01	3.141	9.95	31.41	651	0.316778
UTA	5129	UTA5129	Bothrops bilineatus	Bothriopsis_bilineata_UTA_5129	54	9.6	2	8.21	7.28	5.1	2.501	7.745	25.01	540	0.309676
UTA	5629	UTA5629	Bothrops bilineatus	Bothriopsis_bilineata_UTA_5629	66.4	11.8	1	8.62	7.62	5.74	2.966	8.12	29.66	664	0.273769
UTA	6310	UTA6310	Bothrops bilineatus	Bothriopsis_bilineata_UTA_6310	61.5	10.1	2	7.9	7.09	6.8	2.647	7.495	26.47	615	0.283151
CAS	119921	CAS119921	Bothrops punctatus	Bothriopsis_punctata_CAS_119921	53.5	12.1	1	8.04	8.2	4.31	2.743	8.12	27.43	535	0.296026
UTA	7264	UTA7264	Bothrops punctatus	Bothriopsis_punctata_UTA_7264	106.5	18.6	1	17.25	16.83	8.76	4.85	17.04	48.5	1065	0.35134
CAS	8256	CAS8256	Bothrops taeniatus	Bothriopsis_taeniata_CAS_8256	60.5	9.6	1	10.29	10.41	5.51	2.788	10.35	27.88	605	0.371234
MVZ	175371	MVZ175371	Bothrops taeniatus	Bothriopsis_taeniata_MVZ_175371	67.2	8.6	2	11.66	10.17	4.31	2.949	10.915	29.49	672	0.370125
MVZ	175372	MVZ175372	Bothrops taeniatus	Bothriopsis_taeniata_MVZ_175372	38.1	6.4	1	7.12	6.96	4.17	2.087	7.04	20.87	381	0.337326
UTA	15618	UTA15618	Bothrops taeniatus	Bothriopsis_taeniata_UTA_15618	117	20.3	1	17.88	18.42	8.12	4.474	18.15	44.74	1170	0.405677
MVZ	175374	MVZ175374	Bothrocophias hyoprora	Bothrocophias_hyoprora_MVZ_175374	40	7.5	1	7.98	8.56	6.11	3.202	8.27	32.02	400	0.258276
UTA	3768	UTA3768	Bothrocophias hyoprora	Bothrocophias_hyprora_UTA_3768	55.3	8.6	2	11.56	11.77	9.59	4.35	11.665	43.5	553	0.268161
LACM	76791	LACM76791	Bothrocophias microphthalmus	Bothrocophias_microphthalmus_LACM_76791	57.1	10.2	2	11.09	11.35	10.11	3.885	11.22	38.85	571	0.288803
UTA	21689	UTA21689	Bothrocophias myersi	Bothrocophias_myersi_UTA_21689	44.5	7.8	1	5.58	6.07	5.97	2.483	5.825	24.83	445	0.234595
CAS	89674	CAS89674	Bothrops alternatus	Bothrops_alternata_CAS_89674	66.8	8.1	1	9.81	9.14	7.09	3.574	9.475	35.74	668	0.265109
CAS	116336	CAS116336	Bothrops alternatus	Bothrops_alternatus_CAS_116336	79.3	8.1	1	11.51	11.16	8.04	4.247	11.335	42.47	793	0.266894
CAS	116349	CAS116349	Bothrops alternatus	Bothrops_alternatus_CAS_116349	72.3	7.5	2	11.85	11.5	6.44	4.006	11.675	40.06	723	0.291438
CAS	93095	CAS93095	Bothrops alternatus	Bothrops_alternatus_CAS_93095	45.3	4.2	2	6.95	7.95	4.18	2.629	7.45	26.29	453	0.283378
LACM	146309	LACM146309	Bothrops alternatus	Bothrops_alternatus_LACM_146309	113.4	10.6	1	14.79	14.95	10.23	5.198	14.87	51.98	1134	0.286072
UIMNH	36233	UIMNH36233	Bothrops alternatus	Bothrops_alternatus_UIMNH_36233	96.2	9.3		14.3	15.4	8.16	4.936	14.85	49.36	962	0.300851
UTA	32427	UTA32427	Bothrops alternatus	Bothrops_alternatus_UTA_32427	47.2	4.6	2	8.18	7.72	5.69	2.929	7.95	29.29	472	0.271424
UTA	37709	UTA37709	Bothrops alternatus	Bothrops_alternatus_UTA_37709	48	7.2	1	7.91	9.35	5.67	3.167	8.63	31.67	480	0.272498
UTA	38293	UTA38293	Bothrops alternatus	Bothrops_alternatus_UTA_38293	53	8	1	9.99	9.68	4.79	3.306	9.835	33.06	530	0.297489
UTA	38294	UTA38294	Bothrops alternatus	Bothrops_alternatus_UTA_38294	66.5	10.6	1	10.51	10.13	6.41	3.545	10.32	35.45	665	0.291114
UTA	5602	UTA5602	Bothrops alternatus	Bothrops_alternatus_UTA_5602	67		1	11.24	10.67	7.03	3.657	10.955	36.57	670	0.299562
UTA	7573	UTA7573	Bothrops alternatus	Bothrops_alternatus_UTA_7573	126.5	13.7	1	19.24	19.75	10.35	5.961	19.495	59.61	1265	0.327042
UTA	9721	UTA9721	Bothrops alternatus	Bothrops_alternatus_UTA_9721	107.7	11.5	2	18.58	18.53	11.91	6.104	18.555	61.04	1077	0.303981
UTA	16334	UTA16334	Bothrops ammodytoides	Bothrops_ammodytoides_UTA_16334	53.2	4.9	2	7.35	6.39	5.25	2.876	6.87	28.76	532	0.238873
UTA	39104	UTA39104	Bothrocophias andianus	Bothrops_andianus_UTA_39104	70	10.7	1	10.75	10.82	10.2	3.734	10.785	37.34	700	0.288832
CAS	114091	CAS114091	Bothrops asper	Bothrops_asper_CAS_114091	100.5	17.3	1	9.42	10.45	6.06	3.645	9.935	36.45	1005	0.272565
CAS	119605	CAS119605	Bothrops asper	Bothrops_asper_CAS_119605	131	18	1	22.25	22.52	15.23	6.35	22.385	63.5	1310	0.35252
CAS	74396	CAS74396	Bothrops asper	Bothrops_asper_CAS_74396	171	20	1	22.66	21.91	14.23	6.566	22.285	65.66	1710	0.3394
LACM	114148	LACM114148	Bothrops asper	Bothrops_asper_LACM_114148	99.1	14	1	17.03	18.2	11.51	4.983	17.615	49.83	991	0.353502
LACM	154767	LACM154767	Bothrops asper	Bothrops_asper_LACM_154767	108.3	16.2	2	17.21	17.96	7.95	4.964	17.585	49.64	1083	0.354251
LACM	154769	LACM154769	Bothrops asper	Bothrops_asper_LACM_154769	139.5	19	1	26.55	28.14	12.91	6.884	27.345	68.84	1395	0.397225
LACM	154772	LACM154772	Bothrops asper	Bothrops_asper_LACM_154772	126.5	18	2	19.26	21.35	10.91	6.169	20.305	61.69	1265	0.329146
LACM	154773	LACM154773	Bothrops asper	Bothrops_asper_LACM_154773	100.7	17	1	16.6	16	10.11	4.727	16.3	47.27	1007	0.344828
LACM	154776	LACM154776	Bothrops asper	Bothrops_asper_LACM_154776	109.8	15.3	2	16.67	18.16	8.45	5.269	17.415	52.69	1098	0.330518
LACM	154785	LACM154785	Bothrops asper	Bothrops_asper_LACM_154785	137	20.3	1	21.17	21.82	14.47	6.248	21.495	62.48	1370	0.34403
LACM	154787	LACM154787	Bothrops asper	Bothrops_asper_LACM_154787	91	13.2	2	14.39	13.54	8.3	4.584	13.965	45.84	910	0.304647
LACM	154792	LACM154792	Bothrops asper	Bothrops_asper_LACM_154792	111	18.3	1	15.59	17.22	10.17	5.325	16.405	53.25	1110	0.308075
LACM	154793	LACM154793	Bothrops asper	Bothrops_asper_LACM_154793	78	11.5	2	14.38	14.32	7.54	4.336	14.35	43.36	780	0.33095
LACM	20228	LACM20228	Bothrops asper	Bothrops_asper_LACM_20228	107.2	13.5	2	16.37	18.26	8.38	5.126	17.315	51.26	1072	0.337788
LACM	48462	LACM48462	Bothrops asper	Bothrops_asper_LACM_48462	143.8	17.3	1	18.97	18.9	12.53	5.971	18.935	59.71	1438	0.317116
LACM	59196	LACM59196	Bothrops asper	Bothrops_asper_LACM_59196	111.2	14.5	1	17.24	17.25	11.53	5.26	17.245	52.6	1112	0.327852
MVZ	229770	MVZ229770	Bothrops asper	Bothrops_asper_MVZ_229770	153.2	18	1	28.15	24.78	18.49	7.718	26.465	77.18	1532	0.3429
MVZ	229771	MVZ229771	Bothrops asper	Bothrops_asper_MVZ_229771	200	21.6	1	33.16	33.37	20.46	9.509	33.265	95.09	2000	0.349826
MVZ	229772	MVZ229772	Bothrops asper	Bothrops_asper_MVZ_229772	173	23.3	1	33.75	32.53	19.71	9.431	33.14	94.31	1730	0.351394
MVZ	269174	MVZ269174	Bothrops asper	Bothrops_asper_MVZ_269174	139.5	17	2	24.54	24.99	14.969	7.283	24.765	72.83	1395	0.340038
UIMNH	27838	UIMNH27838	Bothrops asper	Bothrops_asper_UIMNH_27838	91.5	14.5	1	13.48	11.7	10.99	3.845	12.59	38.45	915	0.327438
LACM	20230	LACM20230	Bothrops asper	Bothrops_atrox_LACM_20230	128.5	17.5	1	15.5	18.43	11.17	5.767	16.965	57.67	1285	0.294174
MVZ	163347	MVZ163347	Bothrops atrox	Bothrops_atrox_MVZ_163347	118.7	16	1	15.03	16.48	8.53	5.159	15.755	51.59	1187	0.305389
MVZ	163348	MVZ163348	Bothrops atrox	Bothrops_atrox_MVZ_163348	92.8	13.5	1	12.7	11.88	8.07	4.101	12.29	41.01	928	0.299683
MVZ	163349	MVZ163349	Bothrops atrox	Bothrops_atrox_MVZ_163349	87.3	15.2	1	11.83	11.19	8.75	3.919	11.51	39.19	873	0.293697
MVZ	163355	MVZ163355	Bothrops atrox	Bothrops_atrox_MVZ_163355	108.1	16.3	1	12.26	12.55	9.11	4.103	12.405	41.03	1081	0.30234
MVZ	163361	MVZ163361	Bothrops atrox	Bothrops_atrox_MVZ_163361	129.5	18	1	18.51	20.16	10.95	5.724	19.335	57.24	1295	0.337788
MVZ	175353	MVZ175353	Bothrops atrox	Bothrops_atrox_MVZ_175353	113	17.2	2		18.38	9.76	5.224	18.38	52.24	1130	0.351838
MVZ	175370	MVZ175370	Bothrops atrox	Bothrops_atrox_MVZ_175370	122	16.3	2		20.87	13.76	5.888	20.87	58.88	1220	0.35445
MVZ	176536	MVZ176536	Bothrops atrox	Bothrops_atrox_MVZ_176536	142.4	19.6	1	20.79	20.16	10.79	6.116	20.475	61.16	1424	0.334778
MVZ	197142	MVZ197142	Bothrops atrox	Bothrops_atrox_MVZ_197142	88.3	13.3	1	13.24	14.31	7.46	3.81	13.775	38.1	883	0.361549
MVZ	197143	MVZ197143	Bothrops atrox	Bothrops_atrox_MVZ_197143	108	15.9	1	15.22	16.54	8.4	4.302	15.88	43.02	1080	0.369131
MVZ	42043	MVZ42043	Bothrops atrox	Bothrops_atrox_MVZ_42043	75.1	9.5	1	10.72	10.97	8.69	3.449	10.845	34.49	751	0.314439
CAS	92343	CAS92343	Bothrops barnetti	Bothrops_barnetti_CAS_92343	57	6.8	1		7.04	7.95	2.685	7.04	26.85	570	0.262197
LACM	73359	LACM73359	Bothrops bilineatus	Bothrops_bilineata_LACM_73359	64.4	10.5	2	9.06	8.18	6.93	3.165	8.62	31.65	644	0.272354
LACM	76790	LACM76790	Bothrops bilineatus	Bothrops_bilineata_LACM_76790	68.7	11.1	2	9.43	9.41	8.4	3.12	9.42	31.2	687	0.301923
LACM	44495	LACM44495	Bothrops brazili	Bothrops_brazili_LACM_44495	51	8.5	1	6.88	7.49	7.45	2.939	7.185	29.39	510	0.244471
MVZ	163332	MVZ163332	Bothrops brazili	Bothrops_brazili_MVZ_163332	132	16.5	1	24.35	22.07	14.84	6.733	23.21	67.33	1320	0.34472
MVZ	163333	MVZ163333	Bothrops brazili	Bothrops_brazili_MVZ_163333	134	15	1	20.34		11.46	6.4	20.34	64	1340	0.317812
MVZ	163334	MVZ163334	Bothrops brazili	Bothrops_brazili_MVZ_163334	122.5	14.9	1	24.52	24.82	16.02	6.698	24.67	66.98	1225	0.368319
MVZ	163335	MVZ163335	Bothrops brazili	Bothrops_brazili_MVZ_163335	128.2	17	1	22.72	23.54	13.36	7.016	23.13	70.16	1282	0.329675
MVZ	163336	MVZ163336	Bothrops brazili	Bothrops_brazili_MVZ_163336	150	18	1	24.52	23	14.27	6.804	23.76	68.04	1500	0.349206
MVZ	163337	MVZ163337	Bothrops brazili	Bothrops_brazili_MVZ_163337	131.3	15.3	1	22.79	22.15	13.72	6.422	22.47	64.22	1313	0.349891
MVZ	163338	MVZ163338	Bothrops brazili	Bothrops_brazili_MVZ_163338	123.7	14.4	1	24.67	27.16	11.95	6.457	25.915	64.57	1237	0.401347
MVZ	163339	MVZ163339	Bothrops brazili	Bothrops_brazili_MVZ_163339	118	14.3	2	23.63	21.98	11.37	6.059	22.805	60.59	1180	0.376382
MVZ	163342	MVZ163342	Bothrops brazili	Bothrops_brazili_MVZ_163342	69	8.4	2	15.37	13.31	8.26	3.878	14.34	38.78	690	0.369778
MVZ	163343	MVZ163343	Bothrops brazili	Bothrops_brazili_MVZ_163343	82.3	10	2	15.75	15.36	9.51	4.057	15.555	40.57	823	0.383411
MVZ	176550	MVZ176550	Bothrops brazili	Bothrops_brazili_MVZ_176550	123.3	14	1	22.9	22.34	13.61	5.979	22.62	59.79	1233	0.378324
UTA	16311	UTA16311	Bothrops caribbaeus	Bothrops_caribaeus_UTA_16311	96.2	18.5	1	14.48	13.84	10.17	5.19	14.16	51.9	962	0.272832
UTA	7304	UTA7304	Bothrops caribbaeus	Bothrops_caribaeus_UTA_7304	67.6	13.7	1	7.3	7.63	5.83	2.833	7.465	28.33	676	0.263502
UTA	8350	UTA8350	Bothrops caribbaeus	Bothrops_caribaeus_UTA_8350	103.3	17	1	15.09	15.71	10.18	4.922	15.4	49.22	1033	0.312881
UTA	8351	UTA8351	Bothrops caribbaeus	Bothrops_caribaeus_UTA_8351	79	13.2	2	12.21	12.25	7.88	3.964	12.23	39.64	790	0.308527
UTA	8352	UTA8352	Bothrops caribbaeus	Bothrops_caribaeus_UTA_8352	99.5	16	1	16.59	15.77	10.63	5.15	16.18	51.5	995	0.314175
UTA	8353	UTA8353	Bothrops caribbaeus	Bothrops_caribaeus_UTA_8353	63.4	14.2	1	8.44	8.32	6.01	3.307	8.38	33.07	634	0.253402
UTA	25849	UTA25849	Bothrocophias colombianus	Bothrops_colombianus_UTA_25849	74.2	12.5	1	12.56	11.8	8.11	4.39	12.18	43.9	742	0.277449
CAS	116343	CAS116343	Bothrops cotiara	Bothrops_cotiara_CAS_116343	66.8	9.5	1	8.27	7.61	7.15	3.294	7.94	32.94	668	0.241044
MVZ	200831	MVZ200831	Bothrops cotiara	Bothrops_cotiara_MVZ_200831	96	7.7	1	11.77	12.9	8.71	4.359	12.335	43.59	960	0.282978
UIMNH	36230	UIMNH36230	Bothrops cotiara	Bothrops_cotiara_UIMNH_36230	86.2	11.6	1	8.42	8.94	7.08	3.605	8.68	36.05	862	0.240777
LACM	146127	LACM146127	Bothrops diporus	Bothrops_diporus_LACM_146127	99.6	14	1	12.21	12.08	10.18	5.212	12.145	52.12	996	0.23302
MVZ	127510	MVZ127510	Bothrops diporus	Bothrops_diporus_MVZ_127510	96.9	11.1	1	13.38	13.33	10.73	4.414	13.355	44.14	969	0.30256
MVZ	134155	MVZ134155	Bothrops diporus	Bothrops_diporus_MVZ_134155	73.2	11	1	8.12	8.06	7.46	3.093	8.09	30.93	732	0.261558
MVZ	134156	MVZ134156	Bothrops diporus	Bothrops_diporus_MVZ_134156	71.4	8	1	7.4	8.01	5.14	3.132	7.705	31.32	714	0.246009
UTA	38285	UTA38285	Bothrops erythromelas	Bothrops_erythromelas_UTA_38285	41.2	5.2	2	4.87	4.6	4.21	2.16	4.735	21.6	412	0.219213
CAS	116332	CAS116332	Bothrops fonsecai	Bothrops_fonsecai_CAS_116332	67.6	9.4	1	6.45	7.07	6.62	3.163	6.76	31.63	676	0.213721
UTA	38291	UTA38291	Bothrops fonsecai	Bothrops_fonsecai_UTA_38291	75.8	9.1	2	9.97	10.18	8.07	3.869	10.075	38.69	758	0.260403
UTA	38292	UTA38292	Bothrops fonsecai	Bothrops_fonsecai_UTA_38292	50	8.5	1	6.97	6.4	6.84	3.016	6.685	30.16	500	0.221651
UTA	38289	UTA38289	Bothrops insularis	Bothrops_insularis_UTA_38289	43.9	7.5	1	4.99	4.88	4.05	2.297	4.935	22.97	439	0.214845
CAS	116330	CAS116330	Bothrops jararaca	Bothrops_jararaca_CAS_116330	63.2	9.4	1	7.34	7.89	6.34	2.825	7.615	28.25	632	0.269558
CAS	116335	CAS116335	Bothrops jararaca	Bothrops_jararaca_CAS_116335	94.3	13.6	2	11.57	12	7.63	3.943	11.785	39.43	943	0.298884
CAS	116342	CAS116342	Bothrops jararaca	Bothrops_jararaca_CAS_116342	91.2	15.2	1	10.64	11.13	8.65	3.701	10.885	37.01	912	0.29411
CAS	116345	CAS116345	Bothrops jararaca	Bothrops_jararaca_CAS_116345	77.1	16.4	1	8.5	8.04	7.15	3.037	8.27	30.37	771	0.272308
CAS	116346	CAS116346	Bothrops jararaca	Bothrops_jararaca_CAS_116346	71.9	12.5	1	9.66	8.97	6.33	3.092	9.315	30.92	719	0.301261
CAS	116347	CAS116347	Bothrops jararaca	Bothrops_jararaca_CAS_116347	81		1	9.01	9.49	6.54	3.397	9.25	33.97	810	0.272299
CAS	116348	CAS116348	Bothrops jararaca	Bothrops_jararaca_CAS_116348	80.5	13.3	1	9.02	9.49	7.19	3.824	9.255	38.24	805	0.242024
LACM	146101	LACM146101	Bothrops jararaca	Bothrops_jararaca_LACM_146101	107.6	14.4	2	13.88	12.31	8.74	5.061	13.095	50.61	1076	0.258743
MVZ	134151	MVZ134151	Bothrops jararaca	Bothrops_jararaca_MVZ_134151	80.7		1	9.38	8.9	6.29	3.239	9.14	32.39	807	0.282186
MVZ	134152	MVZ134152	Bothrops jararaca	Bothrops_jararaca_MVZ_134152	102.5	13	2	12.26	12.39	7.7	4.045	12.325	40.45	1025	0.304697
MVZ	134164	MVZ134164	Bothrops jararaca	Bothrops_jararaca_MVZ_134164	110.5	15.7	1	17.26	18.16	9.91	4.493	17.71	44.93	1105	0.394169
UIMNH	36232	UIMNH36232	Bothrops jararaca	Bothrops_jararaca_UIMNH_36232	100.2	13.3	1	12.17	14.21	9.65	3.741	13.19	37.41	1002	0.35258
UTA	38286	UTA38286	Bothrops jararaca	Bothrops_jararaca_UTA_38286	84	12	1	11.9	11.34	8.12	3.846	11.62	38.46	840	0.302132
UTA	38287	UTA38287	Bothrops jararaca	Bothrops_jararaca_UTA_38287	81.6	12.6	1	12.4	12.74	7.54	3.935	12.57	39.35	816	0.319441
UTA	41147	UTA41147	Bothrops jararaca	Bothrops_jararaca_UTA_41147	82.3	11.6	2	12.91	12.28	8.77	3.957	12.595	39.57	823	0.318297
CAS	116329	CAS116329	Bothrops jararacussu	Bothrops_jararacussu_CAS_116329	47.7	6.8	1	7.71	7.99	7.1	2.897	7.85	28.97	477	0.27097
LACM	146081	LACM146081	Bothrops jararacussu	Bothrops_jararacussu_LACM_146081	126	14.7	1	17.49	17.84	12.08	6.255	17.665	62.55	1260	0.282414
LACM	3142	LACM3142	Bothrops jararacussu	Bothrops_jararacussu_LACM_3142	73.5	12.5	1	10.49	11.06	7.51	3.746	10.775	37.46	735	0.28764
MVZ	134153	MVZ134153	Bothrops jararacussu	Bothrops_jararacussu_MVZ_134153	113.2	14.4	2	18.65	19.24	12.38	5.775	18.945	57.75	1132	0.328052
UIMNH	36229	UIMNH36229	Bothrops jararacussu	Bothrops_jararacussu_UIMNH_36229	79.8	12.3	1	9.87	9.64	7.84	3.779	9.755	37.79	798	0.258137
UTA	32425	UTA32425	Bothrops jararacussu	Bothrops_jararacussu_UTA_32425	85.8	15.7	1	14.36	14.18	8.56	4.491	14.27	44.91	858	0.317747
UTA	37700	UTA37700	Bothrops jararacussu	Bothrops_jararacussu_UTA_37700	49.2	6.4	2		7.36	6.37	3.031	7.36	30.31	492	0.242824
UTA	38295	UTA38295	Bothrops jararacussu	Bothrops_jararacussu_UTA_38295	62.6	11.2	1	9.28	9.93	5.8	3.415	9.605	34.15	626	0.281259
UTA	38296	UTA38296	Bothrops jararacussu	Bothrops_jararacussu_UTA_38296	70.1	12.7	1	10.94	10.87	7.03	3.526	10.905	35.26	701	0.309274
UTA	34564	UTA34564	Bothrops jonathani	Bothrops_jonathani_UTA_34564	55.7	6.3	1	9.09	8.86	6.89	3.102	8.975	31.02	557	0.289329
UTA	38290	UTA38290	Bothrops leucurus	Bothrops_leucurus_UTA_38290	85.7	12.7	2	11.12	11.43	7.99	3.88	11.275	38.8	857	0.290593
UTA	23529	UTA23529	Bothrops lojanus	Bothrops_lojanus_UTA_23529	46.5	8.9	1	6.3	6.16	5.49	2.595	6.23	25.95	465	0.240077
UTA	28231	UTA28231	Bothrops moojeni	Bothrops_moojeni_UTA_28231	94	13	2	13.91	13.61	7.38	4.422	13.76	44.22	940	0.311171
UTA	35940	UTA35940	Bothrops moojeni	Bothrops_moojeni_UTA_35940	77	13.1	1	10.05	9.94	6.7	3.517	9.995	35.17	770	0.284191
UTA	38297	UTA38297	Bothrops moojeni	Bothrops_moojeni_UTA_38297	74.3	11.9	1	10.53	10.65	7.73	3.823	10.59	38.23	743	0.277008
UTA	38298	UTA38298	Bothrops moojeni	Bothrops_moojeni_UTA_38298	91.6	13.6	2	14.29	15.53	8.38	4.634	14.91	46.34	916	0.321752
MVZ	134157	MVZ134157	Bothrops neuwiedi	Bothrops_neuwiedi_MVZ_134157	79	9.7	2	9.62	10.58	7.7	3.902	10.1	39.02	790	0.258842
UTA	28232	UTA28232	Bothrops moojeni	Bothrops_neuwiedi_UTA_28232	63.5	9.8	2	8.89	8.99	5.12	3.429	8.94	34.29	635	0.260717
UTA	35938	UTA35938	Bothrops neuwiedi	Bothrops_neuwiedi_UTA_35938	52.6	8.4	1	7.37	7.04	4.91	2.776	7.205	27.76	526	0.259546
UTA	35939	UTA35939	Bothrops neuwiedi	Bothrops_neuwiedi_UTA_35939	72.9	10.4	2	10.32	10.03	4.86	3.554	10.175	35.54	729	0.286297
UTA	39112	UTA39112	Bothrops neuwiedi	Bothrops_neuwiedi_UTA_39112	66.2	11.6	1	8.9	8.77	6.82	3.111	8.835	31.11	662	0.283992
UTA	41141	UTA41141	Bothrops neuwiedi	Bothrops_neuwiedi_UTA_41141	65.3	8.6	1	8.93	8.51	6.82	3.306	8.72	33.06	653	0.263763
UTA	7601	UTA7601	Bothrops pubescens	Bothrops_neuwiedi_UTA_7601	63.3	9.6	1	8.17	8.75	7.01	3.093	8.46	30.93	633	0.273521
UF	39826		Bothrops pictus	Bothrops_pictus_UF_39826	44.5	7.3	1	5.68	5.46	6.99	2.525	5.57	25.25	445	0.220594
UTA	38299	UTA38299	Bothrops leucurus	Bothrops_pradoi_UTA_38299	74.5	10.9	2	10.72	10.74	6.16	3.329	10.73	33.29	745	0.322319
UTA	38300	UTA38300	Bothrops leucurus	Bothrops_pradoi_UTA_38300	73.6	11.7	1	9.75	9.58	6	3.535	9.665	35.35	736	0.273409
UTA	38301	UTA38301	Bothrops leucurus	Bothrops_pradoi_UTA_38301	80.7	11.9	1	9.53	9.59	7.57	3.763	9.56	37.63	807	0.254053
UF	68161		Bothrops pulchra	Bothrops_pulchra_UF_68161	74.2	14.2	2	13.47	13.3	7.18	4.481	13.385	44.81	742	0.298706
UIMNH	63729	UIMNH63729	Bothrops venezuelensis	Bothrops_venezuelensis_UIMNH_63729	85.5	13.6	1	14.44	12.54	9.94	4.804	13.49	48.04	855	0.280808
MVZ	222321	MVZ222321	Calloselasma rhodostoma	Calloselasma_rhodostoma_MVZ_222321	49.4	5.3	1	10.58	11.75	5.56	3.07	11.165	30.7	494	0.363681
MVZ	222322	MVZ222322	Calloselasma rhodostoma	Calloselasma_rhodostoma_MVZ_222322	43.5	7.6	1	8.96	8.7	4.31	2.579	8.83	25.79	435	0.342381
MVZ	222323	MVZ222323	Calloselasma rhodostoma	Calloselasma_rhodostoma_MVZ_222323	46.8	5	2	9.43	9.59	4.78	2.818	9.51	28.18	468	0.337473
UF	59799		Causus defilippii	Causus_defilippii_UF_59799	36.1	3.1	2	3.87	4.22	4.39	1.958	4.045	19.58	361	0.206588
UF	59800		Causus defilippii	Causus_defilippii_UF_59800	38.6	2.8	2	4.15	4.48	5.03	2.129	4.315	21.29	386	0.202677
UF	59803		Causus defilippii	Causus_defilippii_UF_59803	34.6	2.7	1	3.48	3.4	5.16	1.922	3.44	19.22	346	0.17898
UTA	37808	UTA37808	Causus lichtensteinii	Causus_lichtensteini_UTA_37808	46.1	4.5	1	3.03	2.9	4.96	2.183	2.965	21.83	461	0.135822
MVZ	176459	MVZ176459	Causus maculatus	Causus_maculatus_MVZ_176459	39.9	3	1	4.16	4.49	4.95	2.244	4.325	22.44	399	0.192736
MVZ	176461	MVZ176461	Causus maculatus	Causus_maculatus_MVZ_176461	43	3.7	1	3.98	4.51	5.27	2.127	4.245	21.27	430	0.199577
MVZ	65387	MVZ65387	Causus maculatus	Causus_maculatus_MVZ_65387	42.3	5.2	1	4.79	4.3	6.3	2.407	4.545	24.07	423	0.188824
MVZ	75762	MVZ75762	Causus maculatus	Causus_maculatus_MVZ_75762	46.6	3.1	2	4.47	4.61	5.3	2.257	4.54	22.57	466	0.201152
MVZ	81463	MVZ81463	Causus maculatus	Causus_maculatus_MVZ_81463	39.4	3	2	4.31	4.21	4.84	2.072	4.26	20.72	394	0.205598
UTA	7554	UTA7554	Causus resimus	Causus_resimus_UTA_7554	37.6	4.2	1	3.15	3.26	5.75	2.135	3.205	21.35	376	0.150117
MVZ	176501	MVZ176501	Causus rhombeatus	Causus_rhombeatus_MVZ_176501	57.2	6.4	2	5.82	5.31	5.91	2.766	5.565	27.66	572	0.201193
MVZ	65389	MVZ65389	Causus rhombeatus	Causus_rhombeatus_MVZ_65389	35.8	4.5	1	4.51	3.62	5.31	2.03	4.065	20.3	358	0.200246
MVZ	235727	MVZ235727	Cerastes cerastes	Cerastes_cerastes_MVZ_235727	54.8	6.3	1	7.77	7.04	8.94	3.145	7.405	31.45	548	0.235453
MVZ	236625	MVZ236625	Cerastes cerastes	Cerastes_cerastes_MVZ_236625	26	2.7	1	4.46	4.96	4.93	1.798	4.71	17.98	260	0.261958
MVZ	236626	MVZ236626	Cerastes cerastes	Cerastes_cerastes_MVZ_236626	27.5	2.6	1	4.86	4.73	4.74	1.86	4.795	18.6	275	0.257796
MVZ	235728	MVZ235728	Cerastes vipera	Cerastes_vipera_MVZ_235728	28.6	3	1	5	4.81	4.75	2.014	4.905	20.14	286	0.243545
MVZ	9263	MVZ9263	Cerastes vipera	Cerastes_vipera_MVZ_9263	28	3	1	3.64	3.76	5.29	2.007	3.7	20.07	280	0.184355
MVZ	45253	MVZ45253	Mixcoatlus barbouri	Cerrophidion_barbouri_MVZ_45253	42.2	5.3	1		3.88	5.56	2.333	3.88	23.33	422	0.166309
UTA	4450	UTA4450	Mixcoatlus barbouri	Cerrophidion_barbouri_UTA_4450	38	5.3	1	4.06	4.59	5.02	1.957	4.325	19.57	380	0.221002
UTA	6231	UTA6231	Mixcoatlus barbouri	Cerrophidion_barbouri_UTA_6231	37.6	5.1	2	4.21	4.44	3.57	2.237	4.325	22.37	376	0.193339
CAS	163705	CAS163705	Cerrophidion godmani	Cerrophidion_godmani_CAS_163705	59.2	7.5	1		8.03	8.55	3.216	8.03	32.16	592	0.249689
CAS	163944	CAS163944	Cerrophidion godmani	Cerrophidion_godmani_CAS_163944	42.1	5.7	1	5.16	4.77	8.31	2.774	4.965	27.74	421	0.178983
CAS	163947	CAS163947	Cerrophidion godmani	Cerrophidion_godmani_CAS_163947	43.3	5.4	1	4.98	4.66	6.32	2.799	4.82	27.99	433	0.172204
CAS	67027	CAS67027	Cerrophidion godmani	Cerrophidion_godmani_CAS_67027	25.5	3.5	2	2.97	3.15	3.81	2	3.06	20	255	0.153
CAS	67029	CAS67029	Cerrophidion godmani	Cerrophidion_godmani_CAS_67029	28.4	3.6	1	3.27	3.92	3.88	2.14	3.595	21.4	284	0.167991
CAS	67031	CAS67031	Cerrophidion godmani	Cerrophidion_godmani_CAS_67031	34.8	4.2	1	4.3	4.66	4.94	2.407	4.48	24.07	348	0.186124
CAS	67032	CAS67032	Cerrophidion godmani	Cerrophidion_godmani_CAS_67032	43.4	4	1	4.77	5.34	5.28	2.834	5.055	28.34	434	0.17837
LACM	154540	LACM154540	Cerrophidion sasai	Cerrophidion_godmani_LACM_154540	53.5	6.8	1	5.92	6.55	8.18	3.318	6.235	33.18	535	0.187914
LACM	154541	LACM154541	Cerrophidion sasai	Cerrophidion_godmani_LACM_154541	59.3	7.7	1	6.5	6.28	7.79	3.346	6.39	33.46	593	0.190974
LACM	154543	LACM154543	Cerrophidion sasai	Cerrophidion_godmani_LACM_154543	47.2	6	1	4.75	4.98	6.51	2.803	4.865	28.03	472	0.173564
LACM	154544	LACM154544	Cerrophidion sasai	Cerrophidion_godmani_LACM_154544	38.4	5.7	1	3.99	4.05	6.55	2.811	4.02	28.11	384	0.14301
LACM	154545	LACM154545	Cerrophidion sasai	Cerrophidion_godmani_LACM_154545	36.9	5	1	4.38	3.88	6.44	2.755	4.13	27.55	369	0.149909
LACM	28269	LACM28269	Cerrophidion godmani	Cerrophidion_godmani_LACM_28269	34.8	4.6	1	4.13	3.83	6	2.459	3.98	24.59	348	0.161854
MVZ	104700	MVZ104700	Cerrophidion godmani	Cerrophidion_godmani_MVZ_104700	55.5	6.7	1	7.57	7.53	8.5	3.2	7.55	32	555	0.235938
MVZ	109421	MVZ109421	Cerrophidion godmani	Cerrophidion_godmani_MVZ_109421	43.2	4.6	1	5.66	5.66	4.53	2.874	5.66	28.74	432	0.196938
MVZ	131726	MVZ131726	Cerrophidion godmani	Cerrophidion_godmani_MVZ_131726	41.9	4.1	1	5.37	5.09	5.27	2.426	5.23	24.26	419	0.215581
MVZ	256832	MVZ256832	Cerrophidion godmani	Cerrophidion_godmani_MVZ_256832	38.8	4.3	2	4.66	5.37	4.56	2.18	5.015	21.8	388	0.230046
MVZ	264336	MVZ264336	Cerrophidion godmani	Cerrophidion_godmani_MVZ_264336	56.2	5.6	2	5.78	4.75	6.56	3.116	5.265	31.16	562	0.168967
MVZ	264338	MVZ264338	Cerrophidion godmani	Cerrophidion_godmani_MVZ_264338	58.7	6.1	2	5.96	7.26	5.83	3.055	6.61	30.55	587	0.216367
MVZ	40453	MVZ40453	Cerrophidion wilsoni	Cerrophidion_godmani_MVZ_40453	79	8.5	1	9.77	9.21	10.67	4.132	9.49	41.32	790	0.229671
MVZ	40457	MVZ40457	Cerrophidion wilsoni	Cerrophidion_godmani_MVZ_40457	43.2	5.2	1	5.6	5.47	6.92	2.614	5.535	26.14	432	0.211744
MVZ	40459	MVZ40459	Cerrophidion wilsoni	Cerrophidion_godmani_MVZ_40459	45.9	6.1	1	5.76	5.42	6.53	2.891	5.59	28.91	459	0.193359
MVZ	40460	MVZ40460	Cerrophidion wilsoni	Cerrophidion_godmani_MVZ_40460	43.8	5.3	2	5.58	5.55	5.87	2.733	5.565	27.33	438	0.203622
MVZ	40462	MVZ40462	Cerrophidion tzotzilorum	Cerrophidion_godmani_MVZ_40462	44.7	4.6	2	5.43	5.66	6.2	2.771	5.545	27.71	447	0.200108
MVZ	40463	MVZ40463	Cerrophidion wilsoni	Cerrophidion_godmani_MVZ_40463	52.5	6.9	1	7.35	7.4	8.22	3.313	7.375	33.13	525	0.222608
MVZ	40466	MVZ40466	Cerrophidion wilsoni	Cerrophidion_godmani_MVZ_40466	45.8	5.3	2	6.03	6.3	5.48	2.876	6.165	28.76	458	0.21436
MVZ	40467	MVZ40467	Cerrophidion wilsoni	Cerrophidion_godmani_MVZ_40467	60.1	6.8	1	8.91	9.55	6.96	3.517	9.23	35.17	601	0.26244
MVZ	40468	MVZ40468	Cerrophidion wilsoni	Cerrophidion_godmani_MVZ_40468	55.8	6.4	1	5.4	6.06	8.48	3.068	5.73	30.68	558	0.186767
MVZ	40471	MVZ40471	Cerrophidion wilsoni	Cerrophidion_godmani_MVZ_40471	45.2	5.2	2		5.58	6.38	2.76	5.58	27.6	452	0.202174
UIMNH	48710	UIMNH48710	Cerrophidion tzotzilorum	Cerrophidion_godmani_UIMNH_48710	35.2	5	1	6.15	5.96	6.42	2.65	6.055	26.5	352	0.228491
UIMNH	56846	UIMNH56846	Cerrophidion godmani	Cerrophidion_godmani_UIMNH_56846	32.4	4.5	1	4.56	4.4	6.03	2.288	4.48	22.88	324	0.195804
UIMNH	93940	UIMNH93940	Cerrophidion tzotzilorum	Cerrophidion_godmani_UIMNH_93940	27.6	3.5	1	3.6	3.67	5.07	1.999	3.635	19.99	276	0.181841
UIMNH	93941	UIMNH93941	Cerrophidion tzotzilorum	Cerrophidion_godmani_UIMNH_93941	34.6	4.4	1	5.76	6	5.6	2.334	5.88	23.34	346	0.251928
UTA	51399	UTA51399	Cerrophidion sasai	Cerrophidion_sasai_UTA_51399	60.3	8.1	1	6.71	7.21	7.03	3.499	6.96	34.99	603	0.198914
UTA	51400	UTA51400	Cerrophidion sasai	Cerrophidion_sasai_UTA_51400	40.7	4.9	2	5.36	5.78	5.86	2.673	5.57	26.73	407	0.20838
UTA	51401	UTA51401	Cerrophidion sasai	Cerrophidion_sasai_UTA_51401	42.5	5.12	2	5.41	5.34	5.44	2.863	5.375	28.63	425	0.18774
UTA	51402	UTA51402	Cerrophidion sasai	Cerrophidion_sasai_UTA_51402	40.5	5.4	1	5.13	5.19	5.4	2.44	5.16	24.4	405	0.211475
UTA	51403	UTA51403	Cerrophidion sasai	Cerrophidion_sasai_UTA_51403	55.6	7	1	7.38	7.68	7.89	3.458	7.53	34.58	556	0.217756
CAS	163520	CAS163520	Cerrophidion tzotzilorum	Cerrophidion_tzotzilorum_CAS_163520	31.7	4.1	1	3.69	4.12	4.5	2.39	3.905	23.9	317	0.163389
CAS	163521	CAS163521	Cerrophidion tzotzilorum	Cerrophidion_tzotzilorum_CAS_163521	35.1	4.4	2	4.62	4.44	5.02	2.303	4.53	23.03	351	0.1967
CAS	163903	CAS163903	Cerrophidion tzotzilorum	Cerrophidion_tzotzilorum_CAS_163903	32.6	3.7	2	4.31	4.17	5.71	2.318	4.24	23.18	326	0.182916
UTA	21917	UTA21917	Cerrophidion tzotzilorum	Cerrophidion_tzotzilorum_UTA_21917	35.8	4.5	2	5.47	4.76	5.01	2.721	5.115	27.21	358	0.187982
UTA	9641	UTA9641	Cerrophidion tzotzilorum	Cerrophidion_tzotzilorum_UTA_9641	35	4.6	1	5.15	5.28	7.25	2.561	5.215	25.61	350	0.203631
UTA	52953	UTA52953	Cerrophidion wilsoni	Cerrophidion_wilsoni_UTA_52953	57.5	7.3	2	6.66	7.3	6.55	3.241	6.98	32.41	575	0.215366
UTA	59478	UTA59478	Cerrophidion wilsoni	Cerrophidion_wilsoni_UTA_59478	48.2	6.1	1	6.6	6.76	8.26	2.877	6.68	28.77	482	0.232186
UTA	59479	UTA59479	Cerrophidion wilsoni	Cerrophidion_wilsoni_UTA_59479	42	5.3	2	5.68	5.94	5.1	2.633	5.81	26.33	420	0.220661
MVZ	13979	MVZ13979	Crotalus adamanteus	Crotalus_adamanteus_MVZ_13979	134.5	9.3	1	22.45	23.46	11.9	6.827	22.955	68.27	1345	0.336238
MVZ	96803	MVZ96803	Crotalus angelensis	Crotalus_angelensis_MVZ_96803	61	4	1	6.65	7.21	6.93	2.802	6.93	28.02	610	0.247323
MVZ	96805	MVZ96805	Crotalus angelensis	Crotalus_angelensis_MVZ_96805	124.5	8.8	1	12.32	11.61	16.76	5.188	11.965	51.88	1245	0.230628
UTA	12592	UTA12592	Crotalus aquilus	Crotalus_aquilus_UTA_12592	36.4	2.8	2	4.3	4.6	4.35	2.155	4.45	21.55	364	0.206497
UTA	12594	UTA12594	Crotalus aquilus	Crotalus_aquilus_UTA_12594	48.6	5	1	6.3	5.81	6.29	2.722	6.055	27.22	486	0.222447
UTA	12595	UTA12595	Crotalus aquilus	Crotalus_aquilus_UTA_12595	62.2	6.3	1	6.54	6.09	6.9	3.164	6.315	31.64	622	0.199589
UTA	12596	UTA12596	Crotalus aquilus	Crotalus_aquilus_UTA_12596	40.3	3.3	1	4.81		5.36	2.448	4.81	24.48	403	0.196487
UTA	12598	UTA12598	Crotalus aquilus	Crotalus_aquilus_UTA_12598	49.6	4	2	5.52	5.59	5.68	2.59	5.555	25.9	496	0.214479
UTA	12967	UTA12967	Crotalus aquilus	Crotalus_aquilus_UTA_12967	48	4.7	1	5.82	5.04	6.08	2.609	5.43	26.09	480	0.208126
UTA	12968	UTA12968	Crotalus aquilus	Crotalus_aquilus_UTA_12968	46.1	5.1	1	4.94	4.18	6.13	2.687	4.56	26.87	461	0.169706
UTA	17904		Crotalus aquilus	Crotalus_aquilus_UTA_17904	58.5	6.2	1	8.68	8.7	8.64	3.587	8.69	35.87	585	0.242264
UTA	18341	UTA18341	Crotalus aquilus	Crotalus_aquilus_UTA_18341	58.6	5.3	1	5.23	4.72	6.81	3.457	4.975	34.57	586	0.143911
UTA	22524	UTA22524	Crotalus aquilus	Crotalus_aquilus_UTA_22524	50.7	4.3	1	5.74	5.92	7.14	3.094	5.83	30.94	507	0.188429
UTA	22525	UTA22525	Crotalus aquilus	Crotalus_aquilus_UTA_22525	63.8	7.1	1	5.78	5.47	9.44	3.435	5.625	34.35	638	0.163755
UTA	25394	UTA25394	Crotalus aquilus	Crotalus_aquilus_UTA_25394	49.6	4	1	6.61	5.97	5.94	3.009	6.29	30.09	496	0.20904
UTA	25395	UTA25395	Crotalus aquilus	Crotalus_aquilus_UTA_25395	34.4	4.1	1	4.08		4.94	2.25	4.08	22.5	344	0.181333
UTA	25407	UTA25407	Crotalus aquilus	Crotalus_aquilus_UTA_25407	58.3	5.9	1	5.63	5.25	6.56	3.164	5.44	31.64	583	0.171934
UTA	25408	UTA25408	Crotalus aquilus	Crotalus_aquilus_UTA_25408	45.4	3.7	2	4.43	4.46	5.7	2.773	4.445	27.73	454	0.160296
UTA	6180	UTA6180	Crotalus aquilus	Crotalus_aquilus_UTA_6180	53.6	4.7	1	5.47	5.07	7.35	3.205	5.27	32.05	536	0.164431
UTA	6258	UTA6258	Crotalus armstrongi	Crotalus_armstrongi_UTA_6258	44.4	4.5	1	7.56	7.6	6.41	2.587	7.58	25.87	444	0.293003
UTA	6259	UTA6259	Crotalus armstrongi	Crotalus_armstrongi_UTA_6259	35.1	3.3	2	5.67	5.36	5.94	2.263	5.515	22.63	351	0.243703
UTA	6260	UTA6260	Crotalus armstrongi	Crotalus_armstrongi_UTA_6260	42.2	4.2	1	7.34	6.65	5.29	2.648	6.995	26.48	422	0.264162
UTA	7739	UTA7739	Crotalus armstrongi	Crotalus_armstrongi_UTA_7739	42.2	3.9	1	6.92	6.55	6.05	2.576	6.735	25.76	422	0.261452
UTA	7937		Crotalus armstrongi	Crotalus_armstrongi_UTA_7937	39.1	3.8	1	6.07	5.85	4.71	2.496	5.96	24.96	391	0.238782
CAS	63892	CAS63892	Crotalus atrox	Crotalus_atrox_CAS_63892	105.3	9	1	13.28	11.77	11.43	4.51	12.525	45.1	1053	0.277716
CAS	65113	CAS65113	Crotalus atrox	Crotalus_atrox_CAS_65113	72.2	4.4	2	9.26	9.53	7.83	3.645	9.395	36.45	722	0.25775
MVZ	10728	MVZ10728	Crotalus atrox	Crotalus_atrox_MVZ_10728	122.6	8.8	1	16.85	16.03	14.9	5.169	16.44	51.69	1226	0.31805
MVZ	10729	MVZ10729	Crotalus atrox	Crotalus_atrox_MVZ_10729	147	10.5	1	18.99	17.92	18.13	5.963	18.455	59.63	1470	0.309492
MVZ	128168	MVZ128168	Crotalus atrox	Crotalus_atrox_MVZ_128168	107	9.7	1	14.05	14.23	14.82	5.176	14.14	51.76	1070	0.273184
MVZ	233713	MVZ233713	Crotalus atrox	Crotalus_atrox_MVZ_233713	83	3.8	2	10.87	12.04	6.62	3.476	11.455	34.76	830	0.329545
MVZ	244074	MVZ244074	Crotalus atrox	Crotalus_atrox_MVZ_244074	105.6	8	1	15.12	15.96	10.03	4.588	15.54	45.88	1056	0.33871
MVZ	26164	MVZ26164	Crotalus atrox	Crotalus_atrox_MVZ_26164	97	8.4	1	12.77	12.38	13.53	5.12	12.575	51.2	970	0.245605
MVZ	286085	MVZ286085	Crotalus atrox	Crotalus_atrox_MVZ_286085	96.4	6.5	1	13	12.91	9.48	4.357	12.955	43.57	964	0.297338
MVZ	36148	MVZ36148	Crotalus atrox	Crotalus_atrox_MVZ_36148	84.3	4.7	1	9.8	10.19	8.36	3.582	9.995	35.82	843	0.279034
MVZ	36741	MVZ36741	Crotalus atrox	Crotalus_atrox_MVZ_36741	104	8.1	1	14	14.47	9.77	4.46	14.235	44.6	1040	0.31917
MVZ	36743	MVZ36743	Crotalus atrox	Crotalus_atrox_MVZ_36743	98.8	5.9	1	11.71	11.39	9.54	3.96	11.55	39.6	988	0.291667
MVZ	36744	MVZ36744	Crotalus atrox	Crotalus_atrox_MVZ_36744	85.5	6.8	1	13.92	13.95	11.19	4.123	13.935	41.23	855	0.337982
MVZ	37803	MVZ37803	Crotalus atrox	Crotalus_atrox_MVZ_37803	98.2	8	1	11.15	11.95	10.76	4.047	11.55	40.47	982	0.285397
MVZ	38217	MVZ38217	Crotalus atrox	Crotalus_atrox_MVZ_38217	74.8	6	1	10.13	10.35	8.36	3.791	10.24	37.91	748	0.270113
MVZ	405	MVZ405	Crotalus atrox	Crotalus_atrox_MVZ_405	99	8.3	1	12.13	10.76	11.36	4.081	11.445	40.81	990	0.280446
MVZ	44756	MVZ44756	Crotalus atrox	Crotalus_atrox_MVZ_44756	87.8	6.8	1	11.03	11.63	6.77	3.946	11.33	39.46	878	0.287126
MVZ	46688	MVZ46688	Crotalus atrox	Crotalus_atrox_MVZ_46688	94	5	2	12.24	13.31	12.41	3.992	12.775	39.92	940	0.320015
MVZ	50843	MVZ50843	Crotalus atrox	Crotalus_atrox_MVZ_50843	79	6.3	1	9.74	9.98	8.64	3.691	9.86	36.91	790	0.267136
MVZ	50844	MVZ50844	Crotalus atrox	Crotalus_atrox_MVZ_50844	85.5	5	1	11.69	11.01	8.39	3.669	11.35	36.69	855	0.309349
MVZ	52386	MVZ52386	Crotalus atrox	Crotalus_atrox_MVZ_52386	106	5.5	2	11.83	12.28	11.09	4.337	12.055	43.37	1060	0.277957
MVZ	67206	MVZ67206	Crotalus atrox	Crotalus_atrox_MVZ_67206	71.5	5.1	1	9.58	11.1	6.62	3.333	10.34	33.33	715	0.310231
MVZ	76404	MVZ76404	Crotalus atrox	Crotalus_atrox_MVZ_76404	104.2	7.4	1	14.34	15.59	10.71	4.39	14.965	43.9	1042	0.340888
MVZ	9204	MVZ9204	Crotalus atrox	Crotalus_atrox_MVZ_9204	92.2	8.2	1	12.63	11.83	8.97	4.34	12.23	43.4	922	0.281797
UTA	28775		Crotalus atrox	Crotalus_atrox_UTA_28775	117.7	10.2	1	18.22	15.87		5.931	17.045	59.31	1177	0.287388
CAS	24094	CAS24094	Crotalus basiliscus	Crotalus_basiliscus_basiliscus_CAS_24094	89	8.8	1	13.9	15.02	9.38	4.624	14.46	46.24	890	0.312716
CAS	24095	CAS24095	Crotalus basiliscus	Crotalus_basiliscus_basiliscus_CAS_24095	118.5	10.7	1	13.53		11.05	4.974	13.53	49.74	1185	0.272014
CAS	255383	CAS255383	Crotalus basiliscus	Crotalus_basiliscus_CAS_255383	91.4	8.8	1	13.56	14.38	8.31	4.398	13.97	43.98	914	0.317644
CAS	74403	CAS74403	Crotalus basiliscus	Crotalus_basiliscus_CAS_74403	129	11	1	16.83	16.81	9.34	4.728	16.82	47.28	1290	0.355753
CAS	74404	CAS74404	Crotalus basiliscus	Crotalus_basiliscus_CAS_74404	137	9.3	1	17	16.45	9.31	5.762	16.725	57.62	1370	0.290264
CAS	98552	CAS98552	Crotalus basiliscus	Crotalus_basiliscus_CAS_98552	98.4	9.1	1	12.46	12.8	10.1	4.312	12.63	43.12	984	0.292904
LACM	104449	LACM104449	Crotalus basiliscus	Crotalus_basiliscus_LACM_104449	86	6.8	2	12.86	12.66	8.76	4.035	12.76	40.35	860	0.316233
LACM	104454	LACM104454	Crotalus basiliscus	Crotalus_basiliscus_LACM_104454	104.3	8.7	1	14.52	13.97	9.98	5.048	14.245	50.48	1043	0.282191
LACM	104456	LACM104456	Crotalus basiliscus	Crotalus_basiliscus_LACM_104456	102	10.5	1	13.39	11.56	12.26	4.962	12.475	49.62	1020	0.251411
LACM	116400	LACM116400	Crotalus basiliscus	Crotalus_basiliscus_LACM_116400	134.2	9.7	1	12.76	13.45	10.74	5.767	13.105	57.67	1342	0.227241
MVZ	76143	MVZ76143	Crotalus basiliscus	Crotalus_basiliscus_MVZ_76143	110	9.8	1	14.9	15.94	13.71	5.275	15.42	52.75	1100	0.292322
UIMNH	19168	UIMNH19168	Crotalus basiliscus	Crotalus_basiliscus_UIMNH_19168	75.1	5.2	1	10.84	10.01	7.79	3.725	10.425	37.25	751	0.279866
UIMNH	46999	UIMNH46999	Crotalus basiliscus	Crotalus_basiliscus_UIMNH_46999	75.2	5.6	2	10.88	11.7	7.67	3.99	11.29	39.9	752	0.282957
UTA	6071	UTA6071	Crotalus basiliscus	Crotalus_basiliscus_UTA_6071	131.2	8.7	1	18.1	17.74	11.37	5.57	17.92	55.7	1312	0.321724
UTA	16352		Crotalus campbelli	Crotalus_campbelli_UTA_16352	41.2	5.6	1	5.27	5.3	6.04	2.641	5.285	26.41	412	0.200114
UTA	16353	UTA16353	Crotalus campbelli	Crotalus_campbelli_UTA_16353	52	6.6	1	9.77	8.89	6.14	2.966	9.33	29.66	520	0.314565
CAS	102914	CAS102914	Crotalus catalinensis	Crotalus_catalinensis_CAS_102914	47.2	4	1	5.58	5.14	7.57	2.326	5.36	23.26	472	0.230439
CAS	140000	CAS140000	Crotalus catalinensis	Crotalus_catalinensis_CAS_140000	56.4	3.5	1	6.56	6.32	4.55	2.656	6.44	26.56	564	0.24247
CAS	221062	CAS221062	Crotalus catalinensis	Crotalus_catalinensis_CAS_221062	67.5	4.1	2	6.45	6.8	6.97	3.041	6.625	30.41	675	0.217856
CAS	255390	CAS255390	Crotalus catalinensis	Crotalus_catalinensis_CAS_255390	68.9	6.4	1	7.62	7	7.44	3.386	7.31	33.86	689	0.215889
CAS	97997	CAS97997	Crotalus catalinensis	Crotalus_catalinensis_CAS_97997	68.9	4.6	1		6.83	6.64	2.849	6.83	28.49	689	0.239733
MVZ	142054	MVZ142054	Crotalus catalinensis	Crotalus_catalinensis_MVZ_142054	74			7.75	8.1	8.16	3.058	7.925	30.58	740	0.259156
CAS	259893	CAS259893	Crotalus cerastes	Crotalus_cerastes_CAS_259893	31	2.6	1	4.18	3.98	5.91	1.922	4.08	19.22	310	0.212279
CAS	259901	CAS259901	Crotalus cerastes	Crotalus_cerastes_CAS_259901	43.5	4.5	1	5.15	5.98	7.17	2.584	5.565	25.84	435	0.215364
CAS	259903	CAS259903	Crotalus cerastes	Crotalus_cerastes_CAS_259903	38.1	4	1	5.43	4.84	5.57	2.091	5.135	20.91	381	0.245576
CAS	259905	CAS259905	Crotalus cerastes	Crotalus_cerastes_CAS_259905	36.6	2.7	2	4.59	5.56	4.21	2.137	5.075	21.37	366	0.237482
CAS	259906	CAS259906	Crotalus cerastes	Crotalus_cerastes_CAS_259906	42	2.9	2	5.52		5.82	2.155	5.52	21.55	420	0.256148
CAS	259917	CAS259917	Crotalus cerastes	Crotalus_cerastes_CAS_259917	38.7	2.9	2	4.82	5.3	5.77	2.206	5.06	22.06	387	0.229374
UIMNH	41288	UIMNH41288	Crotalus cerastes	Crotalus_cerastes_cercobombus_UIMNH_41288	31.2	3.1	1	4.87	4.71	4.46	1.949	4.79	19.49	312	0.245767
UIMNH	53163	UIMNH53163	Crotalus cerastes	Crotalus_cerastes_cercobombus_UIMNH_53163	54	2.8	2	6.96	6.69	6.82	2.829	6.825	28.29	540	0.241251
UIMNH	53164	UIMNH53164	Crotalus cerastes	Crotalus_cerastes_cercobombus_UIMNH_53164	41	4	1	5.94	5.87	5.63	2.266	5.905	22.66	410	0.260591
UIMNH	171	UIMNH171	Crotalus cerastes	Crotalus_cerastes_laterorepens_UIMNH_171	53	5	1	6.06	5.91	7.23	2.763	5.985	27.63	530	0.216612
UIMNH	37851	UIMNH37851	Crotalus cerastes	Crotalus_cerastes_laterorepens_UIMNH_37851	47.8	3.6	1	6.13	5.28	7.75	2.489	5.705	24.89	478	0.229209
UIMNH	84774	UIMNH84774	Crotalus cerastes	Crotalus_cerastes_laterorepens_UIMNH_84774	30.1	2.2	2	4.02	3.65	4.44	1.698	3.835	16.98	301	0.225854
UIMNH	84775	UIMNH84775	Crotalus cerastes	Crotalus_cerastes_laterorepens_UIMNH_84775	34.4	3.3	1	4.68	3.75	4.95	2.13	4.215	21.3	344	0.197887
UIMNH	84777	UIMNH84777	Crotalus cerastes	Crotalus_cerastes_laterorepens_UIMNH_84777	53.4	4.7	1	5.47	5.87	7.23	2.543	5.67	25.43	534	0.222965
UIMNH	84779	UIMNH84779	Crotalus cerastes	Crotalus_cerastes_laterorepens_UIMNH_84779	48.5	4.2	1	5.68	5.56	6.18	2.469	5.62	24.69	485	0.227623
MVZ	11425	MVZ11425	Crotalus cerastes	Crotalus_cerastes_MVZ_11425	37.9	3.3	1	4.72	4.81	4.91	2.974	4.765	29.74	379	0.160222
MVZ	11426	MVZ11426	Crotalus cerastes	Crotalus_cerastes_MVZ_11426	55.2	5.6	1	6.02	6.02	6.09	2.623	6.02	26.23	552	0.229508
MVZ	170809	MVZ170809	Crotalus cerastes	Crotalus_cerastes_MVZ_170809	35	2.6	1	4.31	4.68	5.45	1.881	4.495	18.81	350	0.238969
MVZ	170810	MVZ170810	Crotalus cerastes	Crotalus_cerastes_MVZ_170810	44.3	3.3	2	5.56	5.15	5.49	2.356	5.355	23.56	443	0.227292
MVZ	173051	MVZ173051	Crotalus cerastes	Crotalus_cerastes_MVZ_173051	53.5	3.2	2	6.33	6.29	6.35	2.655	6.31	26.55	535	0.237665
MVZ	173702	MVZ173702	Crotalus cerastes	Crotalus_cerastes_MVZ_173702	52.8	3.3	2	6.84	6.85	6.41	2.603	6.845	26.03	528	0.262966
MVZ	175818	MVZ175818	Crotalus cerastes	Crotalus_cerastes_MVZ_175818	57	4.2	1	5.73	6.46	6.53	2.947	6.095	29.47	570	0.20682
MVZ	193468	MVZ193468	Crotalus cerastes	Crotalus_cerastes_MVZ_193468	56	3.1	2	5.68	5.64	6.52	2.442	5.66	24.42	560	0.231777
MVZ	196879	MVZ196879	Crotalus cerastes	Crotalus_cerastes_MVZ_196879	43.7	2.8	2	4.77	5.19	3.7	2.12	4.98	21.2	437	0.234906
MVZ	206954	MVZ206954	Crotalus cerastes	Crotalus_cerastes_MVZ_206954	54.5	3.6	1	5.76	5.85	5.52	2.395	5.805	23.95	545	0.24238
MVZ	233633	MVZ233633	Crotalus cerastes	Crotalus_cerastes_MVZ_233633	58.8	4	2	5.88	6.16	6.46	2.815	6.02	28.15	588	0.213854
MVZ	233635	MVZ233635	Crotalus cerastes	Crotalus_cerastes_MVZ_233635	39.1	3.4	1	4.37	5.45	4.93	2.16	4.91	21.6	391	0.227315
MVZ	233639	MVZ233639	Crotalus cerastes	Crotalus_cerastes_MVZ_233639	52.8	5	1	5.16	5.66	6.35	2.703	5.41	27.03	528	0.200148
MVZ	233658	MVZ233658	Crotalus cerastes	Crotalus_cerastes_MVZ_233658	53.3	4.3	1	5.47	5.9	6.89	2.483	5.685	24.83	533	0.228957
MVZ	233659	MVZ233659	Crotalus cerastes	Crotalus_cerastes_MVZ_233659	59.7	4.4	1	4.96	5.33	5.57	2.58	5.145	25.8	597	0.199419
MVZ	233723	MVZ233723	Crotalus cerastes	Crotalus_cerastes_MVZ_233723	47.7	4.4	1	4.56	5.25	6.02	2.522	4.905	25.22	477	0.194489
MVZ	233726	MVZ233726	Crotalus cerastes	Crotalus_cerastes_MVZ_233726	56	5.1	1	5.11	4.71	6.28	2.701	4.91	27.01	560	0.181785
MVZ	233730	MVZ233730	Crotalus cerastes	Crotalus_cerastes_MVZ_233730	53.3	4.2	1	5.24	5.62	5.93	2.552	5.43	25.52	533	0.212774
MVZ	233731	MVZ233731	Crotalus cerastes	Crotalus_cerastes_MVZ_233731	56.5	5.4	1	5.51	5.8	6.68	2.686	5.655	26.86	565	0.210536
MVZ	233772	MVZ233772	Crotalus cerastes	Crotalus_cerastes_MVZ_233772	52	4.5	1	5.01	5.37	6.44	2.337	5.19	23.37	520	0.22208
MVZ	233774	MVZ233774	Crotalus cerastes	Crotalus_cerastes_MVZ_233774	49.8	4.1	1	4.59	4.98	6.09	2.4	4.785	24	498	0.199375
MVZ	233787	MVZ233787	Crotalus cerastes	Crotalus_cerastes_MVZ_233787	50.2	4.1	1	5.1	5.28	5.38	2.349	5.19	23.49	502	0.220945
MVZ	237388	MVZ237388	Crotalus cerastes	Crotalus_cerastes_MVZ_237388	55	5.4	1	5.59	6.85	8.68	2.556	6.22	25.56	550	0.243349
MVZ	264741	MVZ264741	Crotalus cerastes	Crotalus_cerastes_MVZ_264741	52.8	5.2	1	6.29	5.92	6.51	2.628	6.105	26.28	528	0.232306
MVZ	264743	MVZ264743	Crotalus cerastes	Crotalus_cerastes_MVZ_264743	38.3	3.1	1	4.18	4.9	5.23	2.051	4.54	20.51	383	0.221355
MVZ	269752	MVZ269752	Crotalus cerastes	Crotalus_cerastes_MVZ_269752	35	3.2	1	4.67	4.52	4.77	2.07	4.595	20.7	350	0.221981
MVZ	27027	MVZ27027	Crotalus cerastes	Crotalus_cerastes_MVZ_27027	61.5	5.5	1	6.18	6.48	6.6	3.057	6.33	30.57	615	0.207066
MVZ	277427	MVZ277427	Crotalus cerastes	Crotalus_cerastes_MVZ_277427	58	5.8	1	5.06	5.58	6.9	2.669	5.32	26.69	580	0.199326
MVZ	277429	MVZ277429	Crotalus cerastes	Crotalus_cerastes_MVZ_277429	47.8	4.1	1	4.62	4.52	5.16	2.193	4.57	21.93	478	0.20839
MVZ	277450	MVZ277450	Crotalus cerastes	Crotalus_cerastes_MVZ_277450	48.6	3.2	2	5.7	5.48	5.3	2.385	5.59	23.85	486	0.234382
MVZ	277451	MVZ277451	Crotalus cerastes	Crotalus_cerastes_MVZ_277451	39.6	2.8	2	4.48	4.41	4.87	2.163	4.445	21.63	396	0.205502
MVZ	277454	MVZ277454	Crotalus cerastes	Crotalus_cerastes_MVZ_277454	53.8	5.3	1	5.56	6.11	6.51	2.712	5.835	27.12	538	0.215155
MVZ	277455	MVZ277455	Crotalus cerastes	Crotalus_cerastes_MVZ_277455	48	4.9	1	5.32	6.18	6.23	2.489	5.75	24.89	480	0.231016
MVZ	277578	MVZ277578	Crotalus cerastes	Crotalus_cerastes_MVZ_277578	53.2	5.6	1	5.34	5.77	6.36	2.586	5.555	25.86	532	0.214811
MVZ	277582	MVZ277582	Crotalus cerastes	Crotalus_cerastes_MVZ_277582	37.6	3.5	1	4.46	4.02	4.65	1.954	4.24	19.54	376	0.216991
MVZ	50174	MVZ50174	Crotalus cerastes	Crotalus_cerastes_MVZ_50174	32.7	3	1	4.66	4.4	4.53	1.946	4.53	19.46	327	0.232785
MVZ	56525	MVZ56525	Crotalus cerastes	Crotalus_cerastes_MVZ_56525	39.3	3.8	1	5.66	6.64	5.01	2.392	6.15	23.92	393	0.257107
MVZ	58630	MVZ58630	Crotalus cerastes	Crotalus_cerastes_MVZ_58630	31.5	2.7	1	4.19	4.53	5.04	1.942	4.36	19.42	315	0.224511
MVZ	63664	MVZ63664	Crotalus cerastes	Crotalus_cerastes_MVZ_63664	41	3	2	4.16	4.73	5.55	2.001	4.445	20.01	410	0.222139
MVZ	63665	MVZ63665	Crotalus cerastes	Crotalus_cerastes_MVZ_63665	45.7	4.2	1	5.49	5.42	5.48	2.208	5.455	22.08	457	0.247056
MVZ	6706	MVZ6706	Crotalus cerastes	Crotalus_cerastes_MVZ_6706	43.6	4.2	1	5.53	6.2	4.88	2.333	5.865	23.33	436	0.251393
MVZ	67797	MVZ67797	Crotalus cerastes	Crotalus_cerastes_MVZ_67797	57.8	4.4	1	6.72	6.67	7.69	3.168	6.695	31.68	578	0.211332
MVZ	72335	MVZ72335	Crotalus cerastes	Crotalus_cerastes_MVZ_72335	36.6	3.2	1	4.58	4.61	4.63	1.939	4.595	19.39	366	0.236978
MVZ	76406	MVZ76406	Crotalus cerastes	Crotalus_cerastes_MVZ_76406	35.5	2	2	4.55	4.65	4.12	2.041	4.6	20.41	355	0.22538
MVZ	76500	MVZ76500	Crotalus cerastes	Crotalus_cerastes_MVZ_76500	62.5	5.6	1	7.21	6.52	7	2.755	6.865	27.55	625	0.249183
MVZ	76671	MVZ76671	Crotalus cerastes	Crotalus_cerastes_MVZ_76671	39.9	2.3	1	4.83	5.17	4.39	1.92	5	19.2	399	0.260417
MVZ	80175	MVZ80175	Crotalus cerastes	Crotalus_cerastes_MVZ_80175	57.7	5.1	1	6.79	6.57	7.42	2.725	6.68	27.25	577	0.245138
MVZ	81282	MVZ81282	Crotalus cerastes	Crotalus_cerastes_MVZ_81282	47	3.2	2	5.86	6.45	4.85	2.552	6.155	25.52	470	0.241183
MVZ	81283	MVZ81283	Crotalus cerastes	Crotalus_cerastes_MVZ_81283	48.5	2.1	2	5.22	5.57	5.7	2.608	5.395	26.08	485	0.206863
MVZ	9563	MVZ9563	Crotalus cerastes	Crotalus_cerastes_MVZ_9563	41	3.3	1	5.07	5.9	4.69	2.316	5.485	23.16	410	0.236831
MVZ	9565	MVZ9565	Crotalus cerastes	Crotalus_cerastes_MVZ_9565	43.5	4.4	1	5.23	5.82	6.61	2.394	5.525	23.94	435	0.230785
MVZ	9567	MVZ9567	Crotalus cerastes	Crotalus_cerastes_MVZ_9567	43.9	3.8	1	5.31	4.84	7.07	2.24	5.075	22.4	439	0.226562
MVZ	988	MVZ988	Crotalus cerastes	Crotalus_cerastes_MVZ_988	36.6	4.3	1	5.83	5.62	4.98	2.412	5.725	24.12	366	0.237355
UIMNH	19171	UIMNH19171	Crotalus cerastes	Crotalus_cerastes_UIMNH_19171	36.2	3.4	1		5.38	4.75	2.255	5.38	22.55	362	0.238581
UIMNH	84780	UIMNH84780	Crotalus cerastes	Crotalus_cerastes_UIMNH_84780	44.2	4.3	1	6.52	6.05	5.93	2.289	6.285	22.89	442	0.274574
UIMNH	85811	UIMNH85811	Crotalus cerastes	Crotalus_cerastes_UIMNH_85811	57.7	4.9	1	6.43	6.4	8.89	2.663	6.415	26.63	577	0.240894
UTA	45170		Crotalus cerastes	Crotalus_cerastes_UTA_45170	64.5	4.4	2	9.94	9.08	8.48	3.451	9.51	34.51	645	0.275572
UTA	45928		Crotalus cerastes	Crotalus_cerastes_UTA_45928	45.3	4.6	1	5.85	6	6.4	2.464	5.925	24.64	453	0.240463
UTA	50708		Crotalus cerastes	Crotalus_cerastes_UTA_50708	45.8	4.5	1	6.03	6.2	6.28	2.592	6.115	25.92	458	0.235918
UTA	51244		Crotalus cerastes	Crotalus_cerastes_UTA_51244	59	5.7	1	8.17	8.22	7.58	3.023	8.195	30.23	590	0.271088
UTA	52433		Crotalus cerastes	Crotalus_cerastes_UTA_52433	49.7	5.3	1	6.98	6.75	6.54	2.545	6.865	25.45	497	0.269745
UTA	58652		Crotalus cerastes	Crotalus_cerastes_UTA_58652	38.4	3.7	1	5.78	5.51	5.59	2.303	5.645	23.03	384	0.245115
MVZ	6699	MVZ6699	Crotalus stephensi	Crotalus_confluentus_stephensi_MVZ_6699	56.4	4.6	1		6.06	5.64	2.483	6.06	24.83	564	0.24406
UIMNH	19174	UIMNH19174	Crotalus culminatus	Crotalus_culminatus_UIMNH_19174	145.8	10	1	13.64	15.41	9.98	5.829	14.525	58.29	1458	0.249185
UTA	41028	UTA41028	Crotalus culminatus	Crotalus_culminatus_UTA_41028	103.8	11.1	1	13.63	15.44	11.46	5.001	14.535	50.01	1038	0.290642
CAS	67048	CAS67048	Crotalus durissus	Crotalus_durissus_durissus_CAS_67048	134.3	10.3	1	15.81	15.51	11.6	5.819	15.66	58.19	1343	0.269118
MVZ	127523	MVZ127523	Crotalus durissus	Crotalus_durissus_MVZ_127523	87.6	6.4	1	11.13	10	8.99	4.261	10.565	42.61	876	0.247946
MVZ	127524	MVZ127524	Crotalus durissus	Crotalus_durissus_MVZ_127524	119.1	13.2	1	13.35	14.07	11.78	4.493	13.71	44.93	1191	0.305141
MVZ	134159	MVZ134159	Crotalus durissus	Crotalus_durissus_MVZ_134159	110.2	7.5	1	12.78	11.82	9.66	4.664	12.3	46.64	1102	0.263722
MVZ	176268	MVZ176268	Crotalus durissus	Crotalus_durissus_MVZ_176268	76.5	7	1	10.98	10.16	7.15	4.074	10.57	40.74	765	0.25945
MVZ	200840	MVZ200840	Crotalus durissus	Crotalus_durissus_MVZ_200840	107.4	9.4	1	14.31	14.99	10.06	4.513	14.65	45.13	1074	0.324618
CAS	116328	CAS116328	Crotalus durissus	Crotalus_durissus_terrificus_CAS_116328	89.6	9.3	1	14.6	15.03	10.53	4.601	14.815	46.01	896	0.321995
CAS	116337	CAS116337	Crotalus durissus	Crotalus_durissus_terrificus_CAS_116337	88.4	6	1	11.65	12.39	8.91	4.092	12.02	40.92	884	0.293744
CAS	116338	CAS116338	Crotalus durissus	Crotalus_durissus_terrificus_CAS_116338	86	8.9	1	12.08	11.63	8.84	4.15	11.855	41.5	860	0.285663
CAS	143258	CAS143258	Crotalus tzabcan	Crotalus_durissus_tzabcan_CAS_143258		10.5	1	16.2	15.95	9.91	5.949	16.075	59.49		0.270213
UF	29389		Crotalus durissus	Crotalus_durissus_UF_29389	99.2	8	1	13.77	13.83	11.91	4.703	13.8	47.03	992	0.29343
UIMNH	95132	UIMNH95132	Crotalus durissus	Crotalus_durissus_UIMNH_95132	115.5	8.2	1		13.59	11.51	4.697	13.59	46.97	1155	0.289334
UIMNH	95134	UIMNH95134	Crotalus durissus	Crotalus_durissus_UIMNH_95134	75.2	5.6	1	11	9.4	8.2	3.566	10.2	35.66	752	0.286035
UTA	21912	UTA21912	Crotalus durissus	Crotalus_durissus_UTA_21912	90.4	7.9	1	14.42	12.46	8.19	4.56	13.44	45.6	904	0.294737
UTA	28233	UTA28233	Crotalus durissus	Crotalus_durissus_UTA_28233	87.5	5.8	2	14.91	15.37	7.48	4.685	15.14	46.85	875	0.323159
UTA	31827		Crotalus simus	Crotalus_durissus_UTA_31827	139.4	10.2	1	18.92	16.41	13.97	6.496	17.665	64.96	1394	0.271937
UTA	3984	UTA3984	Crotalus durissus	Crotalus_durissus_UTA_3984	81.1	8.6	1	12.6	13.36	11.09	4.033	12.98	40.33	811	0.321845
UTA	6121	UTA6121	Crotalus culminatus	Crotalus_durissus_UTA_6121	84.6	9.3	1	12.91	13.68	8.5	3.971	13.295	39.71	846	0.334802
UTA	8193	UTA8193	Crotalus culminatus	Crotalus_durissus_UTA_8193	93	7.4	1	13.88	14.48	8.53	4.357	14.18	43.57	930	0.325453
MVZ	55388	MVZ55388	Crotalus enyo	Crotalus_enyo_furvus_MVZ_55388	61.6	6.4	1	8.15	8.45	6.91	3.034	8.3	30.34	616	0.273566
LACM	126268	LACM126268	Crotalus enyo	Crotalus_enyo_LACM_126268	60.5	5.5	1	6.78	6.43	6.07	2.949	6.605	29.49	605	0.223974
LACM	132134	LACM132134	Crotalus enyo	Crotalus_enyo_LACM_132134	53.5	5.5	1	6.65	7.14	7.29	2.89	6.895	28.9	535	0.238581
LACM	132135	LACM132135	Crotalus enyo	Crotalus_enyo_LACM_132135	54.5	3.5	2	6.54	6.5	6.41	2.859	6.52	28.59	545	0.228052
LACM	134435	LACM134435	Crotalus enyo	Crotalus_enyo_LACM_134435	57.8	4	2	8.57	7.68	6.16	3.135	8.125	31.35	578	0.259171
LACM	134436	LACM134436	Crotalus enyo	Crotalus_enyo_LACM_134436	67.4	6.4	1	8.38	8.25	6.65	3.262	8.315	32.62	674	0.254905
LACM	134437	LACM134437	Crotalus enyo	Crotalus_enyo_LACM_134437	60	4.4	2	7.21	7.34	6.2	2.906	7.275	29.06	600	0.250344
LACM	134438	LACM134438	Crotalus enyo	Crotalus_enyo_LACM_134438	60.5	6.6	1	7.59	7.41	6.67	2.833	7.5	28.33	605	0.264737
LACM	20023	LACM20023	Crotalus enyo	Crotalus_enyo_LACM_20023	68	5.3	2	8.1	8.25	6.97	2.84	8.175	28.4	680	0.287852
LACM	74024	LACM74024	Crotalus enyo	Crotalus_enyo_LACM_74024	52.8	3.6	2	5.69	6.02	6.29	2.71	5.855	27.1	528	0.216052
MVZ	11919	MVZ11919	Crotalus enyo	Crotalus_enyo_MVZ_11919	59.5	4	2	6.81	6.2	5.35	2.579	6.505	25.79	595	0.25223
MVZ	132943	MVZ132943	Crotalus enyo	Crotalus_enyo_MVZ_132943	67.2	7	1	7.69	7.99	6.71	3.24	7.84	32.4	672	0.241975
MVZ	13795	MVZ13795	Crotalus enyo	Crotalus_enyo_MVZ_13795	60.5	6.1	1	6.93	6.39	5.64	2.572	6.66	25.72	605	0.258942
MVZ	164980	MVZ164980	Crotalus enyo	Crotalus_enyo_MVZ_164980	49.5	4.3	1	6.51	7.07	5.42	2.64	6.79	26.4	495	0.257197
MVZ	176062	MVZ176062	Crotalus enyo	Crotalus_enyo_MVZ_176062	67.9	6.8	1	7.61	8.96	7.79	3.211	8.285	32.11	679	0.258019
MVZ	182138	MVZ182138	Crotalus enyo	Crotalus_enyo_MVZ_182138	64	6.6	1	7.72	7.96	7.01	3.179	7.84	31.79	640	0.246618
MVZ	182250	MVZ182250	Crotalus enyo	Crotalus_enyo_MVZ_182250	47	4.5	1	6.02	6.02	5.93	2.228	6.02	22.28	470	0.270197
MVZ	182272	MVZ182272	Crotalus enyo	Crotalus_enyo_MVZ_182272	55	5.1	1	6.33	6.15	5.89	2.771	6.24	27.71	550	0.225189
MVZ	182273	MVZ182273	Crotalus enyo	Crotalus_enyo_MVZ_182273	46.1	4.4	1	5.99	5.48	5.14	2.284	5.735	22.84	461	0.251095
MVZ	189962	MVZ189962	Crotalus enyo	Crotalus_enyo_MVZ_189962	67.2	6.5	1	7.71	7.82	8.02	2.943	7.765	29.43	672	0.263846
MVZ	189963	MVZ189963	Crotalus enyo	Crotalus_enyo_MVZ_189963	60.1	5.6	1	6.4	6.53	6.3	3.098	6.465	30.98	601	0.208683
MVZ	189967	MVZ189967	Crotalus enyo	Crotalus_enyo_MVZ_189967	58.3	5.4	1	6.72	6.49	6	2.725	6.605	27.25	583	0.242385
MVZ	189968	MVZ189968	Crotalus enyo	Crotalus_enyo_MVZ_189968	55.3	5.2	1	6.06	5.02	6.44	2.7	5.54	27	553	0.205185
MVZ	190000	MVZ190000	Crotalus enyo	Crotalus_enyo_MVZ_190000	73.1	6.3	1	7.86	7.55	8.34	3.141	7.705	31.41	731	0.245304
MVZ	190042	MVZ190042	Crotalus enyo	Crotalus_enyo_MVZ_190042	63.4	6.7	1	6.95	7.27	5.6	2.978	7.11	29.78	634	0.238751
MVZ	190043	MVZ190043	Crotalus enyo	Crotalus_enyo_MVZ_190043	51.2	4.4	1	6.18	6.12	5.3	2.587	6.15	25.87	512	0.237727
MVZ	190086	MVZ190086	Crotalus enyo	Crotalus_enyo_MVZ_190086	40.9	3.6	1	4.78	5.07	4.59	2.294	4.925	22.94	409	0.21469
MVZ	190129	MVZ190129	Crotalus enyo	Crotalus_enyo_MVZ_190129	75	7.4	1	7.6	7.44	6.79	3.259	7.52	32.59	750	0.230746
MVZ	289971	MVZ289971	Crotalus enyo	Crotalus_enyo_MVZ_289971	64.6	4.4	2	7.85	7.96	6.33	2.75	7.905	27.5	646	0.287455
MVZ	54637	MVZ54637	Crotalus enyo	Crotalus_enyo_MVZ_54637	63.3	5	1	7.35	7.11	6.55	3.03	7.23	30.3	633	0.238614
UTA	7617		Crotalus enyo	Crotalus_enyo_UTA_7617	48.3	3.3	2	6.44	5.78	5.88	2.669	6.11	26.69	483	0.228925
UTA	55372	UTA55372	Crotalus ericsmithi	Crotalus_ericsmithi_UTA_55372	46.4	7.1	1	8.42	8.94	4.19	2.554	8.68	25.54	464	0.339859
MVZ	76501	MVZ76501	Crotalus estebanensis	Crotalus_estebanensis_MVZ_76501	107.7	7.5	1	11.87	10.75	10.55	4.471	11.31	44.71	1077	0.252964
MVZ	76502	MVZ76502	Crotalus estebanensis	Crotalus_estebanensis_MVZ_76502	111.5	7.3	1	11.9	12.34	7.82	4.502	12.12	45.02	1115	0.269214
CAS	135513	CAS135513	Crotalus ruber	Crotalus_exsul_CAS_135513	69.5	4	2	8.67	8.29	7.88	3.482	8.48	34.82	695	0.243538
CAS	135536	CAS135536	Crotalus ruber	Crotalus_exsul_CAS_135536	69	5.3	1	9.04	8.82	8.69	3.286	8.93	32.86	690	0.271759
CAS	56271	CAS56271	Crotalus ruber	Crotalus_exsul_CAS_56271	69.7	3.9	2	8.41	8.51	7.44	3.132	8.46	31.32	697	0.270115
CAS	56273	CAS56273	Crotalus ruber	Crotalus_exsul_CAS_56273	67.5	5.1	1	9.69	9.64	8.43	3.371	9.665	33.71	675	0.28671
CAS	79788	CAS79788	Crotalus ruber	Crotalus_exsul_CAS_79788	70.8	5	1	10.51	9.65	6.87	3.481	10.08	34.81	708	0.289572
MVZ	45316	MVZ45316	Crotalus ruber	Crotalus_exsul_MVZ_45316	78.4	6	1	9.69	10.12	8.47	3.642	9.905	36.42	784	0.271966
MVZ	51087	MVZ51087	Crotalus ruber	Crotalus_exsul_MVZ_51087	67.5	73.5	1		7.73	7.79	3.025	7.73	30.25	675	0.255537
CAS	65059	CAS65059	Crotalus horridus	Crotalus_horridus_CAS_65059	92.6	5.7	1	9.68	10.12	8.55	4.123	9.9	41.23	926	0.240116
CAS	65061	CAS65061	Crotalus horridus	Crotalus_horridus_CAS_65061	104.8	9.1	1	13.42	12.53	9.31	4.776	12.975	47.76	1048	0.271671
CAS	65072	CAS65072	Crotalus horridus	Crotalus_horridus_CAS_65072	90.4	8	1	10.03	10.49	8.77	4.28	10.26	42.8	904	0.23972
CAS	65076	CAS65076	Crotalus horridus	Crotalus_horridus_CAS_65076	82	5.6	2	7.57	8.44	8.48	3.83	8.005	38.3	820	0.209008
MVZ	129391	MVZ129391	Crotalus horridus	Crotalus_horridus_MVZ_129391	113.2	10.4	1	13.6	12.82	14.45	4.98	13.21	49.8	1132	0.265261
MVZ	27030	MVZ27030	Crotalus horridus	Crotalus_horridus_MVZ_27030	99	5.9	1	9.9	9.71	5.91	3.481	9.805	34.81	990	0.281672
MVZ	89658	MVZ89658	Crotalus horridus	Crotalus_horridus_MVZ_89658	63.5	5.3	1	9.15	8.55	9.42	3.531	8.85	35.31	635	0.250637
UIMNH	64657	UIMNH64657	Crotalus intermedius	Crotalus_intermedius_gloydi_UIMNH_64657	35.8	3.6	1	4.48	3.87	5.53	2.462	4.175	24.62	358	0.169578
UIMNH	73610	UIMNH73610	Crotalus intermedius	Crotalus_intermedius_gloydi_UIMNH_73610	47.1	4	1	4.44	4.61	6.23	2.7	4.525	27	471	0.167593
UIMNH	73611	UIMNH73611	Crotalus intermedius	Crotalus_intermedius_gloydi_UIMNH_73611	50.2	3.6	1	4.53	4.69	5.45	2.543	4.61	25.43	502	0.181282
UIMNH	87713	UIMNH87713	Crotalus intermedius	Crotalus_intermedius_gloydi_UIMNH_87713	46	3.6	1	4.67	4.17	5.76	2.201	4.42	22.01	460	0.200818
CAS	93777	CAS93777	Crotalus intermedius	Crotalus_intermedius_intermedius_CAS_93777	43.1	4.4	1	4.33	4.1	6.53	2.486	4.215	24.86	431	0.169549
UIMNH	51365	UIMNH51365	Crotalus intermedius	Crotalus_intermedius_intermedius_UIMNH_51365	40.3	3.7	1	3.45	3.55	4.76	2.048	3.5	20.48	403	0.170898
UIMNH	53099	UIMNH53099	Crotalus intermedius	Crotalus_intermedius_intermedius_UIMNH_53099	35.5	2.4	2	3.56	3.15	3.75	1.965	3.355	19.65	355	0.170738
UIMNH	56854	UIMNH56854	Crotalus intermedius	Crotalus_intermedius_intermedius_UIMNH_56854	31.2	2.8	1	3.26	3.44	4.69	2.101	3.35	21.01	312	0.159448
UIMNH	60803	UIMNH60803	Crotalus intermedius	Crotalus_intermedius_intermedius_UIMNH_60803	46.8	4.2	1	5.19	4.35	5.07	2.35	4.77	23.5	468	0.202979
UIMNH	63688	UIMNH63688	Crotalus intermedius	Crotalus_intermedius_intermedius_UIMNH_63688	30.6	3.5	1	3.46	3.67	4.85	1.861	3.565	18.61	306	0.191564
UIMNH	73614	UIMNH73614	Crotalus intermedius	Crotalus_intermedius_intermedius_UIMNH_73614	39.5	3.2	1		3.81	4.95	2.113	3.81	21.13	395	0.180312
UIMNH	73615	UIMNH73615	Crotalus intermedius	Crotalus_intermedius_intermedius_UIMNH_73615	42.2	3.4	1	3.81	3.66	5.24	2.086	3.735	20.86	422	0.179051
LACM	132089	LACM132089	Crotalus intermedius	Crotalus_intermedius_LACM_132089	42.1	3.2	2	2.87	2.56	5.52	2.223	2.715	22.23	421	0.122132
LACM	20024	LACM20024	Crotalus intermedius	Crotalus_intermedius_LACM_20024	30.5	3	1	2.34	2.28	4.86	1.765	2.31	17.65	305	0.130878
MVZ	158955	MVZ158955	Crotalus intermedius	Crotalus_intermedius_MVZ_158955	42.7	3.4	1	3.17	3.82	5.3	2.291	3.495	22.91	427	0.152553
UIMNH	35016	UIMNH35016	Crotalus intermedius	Crotalus_intermedius_omiltemanus_UIMNH_35016	49.1	3.6	1	4.11	4.59	5.35	2.218	4.35	22.18	491	0.196123
UTA	6821		Crotalus intermedius	Crotalus_intermedius_omiltemanus_UTA_6821	51.7	3.7	2	4.05	3.9	5.14	2.716	3.975	27.16	517	0.146355
UTA	12569	UTA12569	Crotalus intermedius	Crotalus_intermedius_UTA_12569	39.4	3.4	2	3.01	2.81	4.38	2.077	2.91	20.77	394	0.140106
UTA	12570	UTA12570	Crotalus intermedius	Crotalus_intermedius_UTA_12570	39.3	3.6	1	3.53	3.13	4.63	2.184	3.33	21.84	393	0.152473
UTA	14215	UTA14215	Crotalus intermedius	Crotalus_intermedius_UTA_14215	35	3.8	1	2.63	3.38	5.14	2.007	3.005	20.07	350	0.149726
UTA	14216	UTA14216	Crotalus intermedius	Crotalus_intermedius_UTA_14216	36.5	3.9	1	2.93	2.48	4.33	2.138	2.705	21.38	365	0.12652
UTA	51457	UTA51457	Crotalus intermedius	Crotalus_intermedius_UTA_51457	47.4	4.3	1	3.16	3.23	5.2	2.566	3.195	25.66	474	0.124513
UTA	56263	UTA56263	Crotalus intermedius	Crotalus_intermedius_UTA_56263	41.7	3.2	1	2.6	2.7	4.54	2.044	2.65	20.44	417	0.129648
UTA	5627	UTA5627	Crotalus intermedius	Crotalus_intermedius_UTA_5627	44.7	3.5	1	3.5	3.1	4.39	2.315	3.3	23.15	447	0.142549
UTA	5637	UTA5637	Crotalus intermedius	Crotalus_intermedius_UTA_5637	44.5	4.3	1		3.68	4.95	2.553	3.68	25.53	445	0.144144
UTA	5791	UTA5791	Crotalus intermedius	Crotalus_intermedius_UTA_5791	36.8	3.5	1	2.92	2.85	4.85	1.892	2.885	18.92	368	0.152484
UTA	6122	UTA6122	Crotalus intermedius	Crotalus_intermedius_UTA_6122	39.9	4.2	1	2.85	3.05	4.47	2.114	2.95	21.14	399	0.139546
UTA	6232	UTA6232	Crotalus intermedius	Crotalus_intermedius_UTA_6232	51.6	5.4	1	3.55	3.29	5.93	2.667	3.42	26.67	516	0.128234
UTA	6233	UTA6233	Crotalus intermedius	Crotalus_intermedius_UTA_6233	46.3	3.6	1	3.24	3.01	5.17	2.385	3.125	23.85	463	0.131027
UTA	6245		Crotalus intermedius	Crotalus_intermedius_UTA_6245	49.3	4.3	1	3.96	3.88	5.85	2.521	3.92	25.21	493	0.155494
UTA	6356	UTA6356	Crotalus intermedius	Crotalus_intermedius_UTA_6356	44.7	3.6	2	3.74	2.94	4.55	2.431	3.34	24.31	447	0.137392
UTA	9354	UTA9354	Crotalus intermedius	Crotalus_intermedius_UTA_9354	51.4	5.2	1	4.27	4	5.46	2.791	4.135	27.91	514	0.148155
CAS	204172	CAS204172	Crotalus lepidus	Crotalus_lepidus_CAS_204172	45	3.1	2	4.43	4.32	4.33	2.205	4.375	22.05	450	0.198413
CAS	255393	CAS255393	Crotalus lepidus	Crotalus_lepidus_CAS_255393	37.1	2.9	1	3.47	3.08	3.95	1.88	3.275	18.8	371	0.174202
CAS	48021	CAS48021	Crotalus lepidus	Crotalus_lepidus_klauberi_CAS_48021	51.4	5	1	4.77	4.48	6.61	2.565	4.625	25.65	514	0.180312
CAS	48022	CAS48022	Crotalus lepidus	Crotalus_lepidus_klauberi_CAS_48022	49.8	4.4	1	4.06	4.12	5.21	2.326	4.09	23.26	498	0.175838
CAS	48024	CAS48024	Crotalus lepidus	Crotalus_lepidus_klauberi_CAS_48024	42.2	3	1	3.66	3.83	4.61	2.026	3.745	20.26	422	0.184847
CAS	48025	CAS48025	Crotalus lepidus	Crotalus_lepidus_klauberi_CAS_48025	40	4.1	1	3.59	3.72	5.3	2.178	3.655	21.78	400	0.167815
CAS	48026	CAS48026	Crotalus lepidus	Crotalus_lepidus_klauberi_CAS_48026	45.9	3.5	2	4.05	4.12	4.74	2.288	4.085	22.88	459	0.17854
CAS	48027	CAS48027	Crotalus lepidus	Crotalus_lepidus_klauberi_CAS_48027	43.8	3.5	2	3.95	4.59	4.88	2.29	4.27	22.9	438	0.186463
CAS	48029	CAS48029	Crotalus lepidus	Crotalus_lepidus_klauberi_CAS_48029	35.8	2.7	2	3.33	3.61	4.13	2.023	3.47	20.23	358	0.171527
CAS	48030	CAS48030	Crotalus lepidus	Crotalus_lepidus_klauberi_CAS_48030	42.8	3.6	1	3.55	3.66	4.82	2.156	3.605	21.56	428	0.167208
CAS	48032	CAS48032	Crotalus lepidus	Crotalus_lepidus_klauberi_CAS_48032	54.6	5	1	4.37	4.56	6.31	2.632	4.465	26.32	546	0.169643
UIMNH	15651	UIMNH15651	Crotalus lepidus	Crotalus_lepidus_klauberi_UIMNH_15651	52.2	4	1	4.72	5.66	5.67	2.629	5.19	26.29	522	0.197413
UIMNH	22812	UIMNH22812	Crotalus lepidus	Crotalus_lepidus_klauberi_UIMNH_22812	54.9	5.1	1	4.41	5.63	6.27	2.603	5.02	26.03	549	0.192854
UIMNH	6010	UIMNH6010	Crotalus lepidus	Crotalus_lepidus_klauberi_UIMNH_6010	55.7	4.4	1	4.52	4.6	5.9	2.456	4.56	24.56	557	0.185668
UIMNH	6058	UIMNH6058	Crotalus lepidus	Crotalus_lepidus_klauberi_UIMNH_6058	54	4	1	4.46	4.9	5.75	2.445	4.68	24.45	540	0.191411
UIMNH	78778	UIMNH78778	Crotalus lepidus	Crotalus_lepidus_klauberi_UIMNH_78778	52.2	4.6	1	4.77	4.34	6.82	2.568	4.555	25.68	522	0.177375
UIMNH	78779	UIMNH78779	Crotalus lepidus	Crotalus_lepidus_klauberi_UIMNH_78779	53.5	4.2	1	5.13	5.31	4.9	2.561	5.22	25.61	535	0.203827
UIMNH	78780	UIMNH78780	Crotalus lepidus	Crotalus_lepidus_klauberi_UIMNH_78780	41.7	4.1	1	4.18	4.03	5.09	2.088	4.105	20.88	417	0.1966
UTA	10341		Crotalus lepidus	Crotalus_lepidus_klauberi_UTA_10341	47.4	3.5	1	4.26	4.6	5.36	2.576	4.43	25.76	474	0.171972
CAS	100132	CAS100132	Crotalus lepidus	Crotalus_lepidus_lepidus_CAS_100132	54.6	4.5	1	4.95	5.14	6.07	2.611	5.045	26.11	546	0.193221
UTA	6723		Crotalus lepidus	Crotalus_lepidus_lepidus_UTA_6723	44.3	3.4	2	4.64	4.62	5.27	2.459	4.63	24.59	443	0.188288
UTA	8136		Crotalus lepidus	Crotalus_lepidus_lepidus_UTA_8136	46.7	3.9	2	5.63	5.09	5.25	2.377	5.36	23.77	467	0.225494
MVZ	139391	MVZ139391	Crotalus lepidus	Crotalus_lepidus_MVZ_139391	73.5	5.5	1	5.12	5.09	8.04	2.966	5.105	29.66	735	0.172117
MVZ	22404	MVZ22404	Crotalus lepidus	Crotalus_lepidus_MVZ_22404	39.3	3.8	1	3.7	3.7	3.45	1.928	3.7	19.28	393	0.191909
MVZ	229956	MVZ229956	Crotalus lepidus	Crotalus_lepidus_MVZ_229956	41.1	2.6	2	3.34	3.36	4.65	2.049	3.35	20.49	411	0.163494
MVZ	229957	MVZ229957	Crotalus lepidus	Crotalus_lepidus_MVZ_229957	65.5	5.1	1	6.62	7.29	8.12	3.136	6.955	31.36	655	0.221779
MVZ	277610	MVZ277610	Crotalus lepidus	Crotalus_lepidus_MVZ_277610	58.1	4.7	1	4.56	4.35	5.34	2.604	4.455	26.04	581	0.171083
MVZ	40586	MVZ40586	Crotalus lepidus	Crotalus_lepidus_MVZ_40586	52.3	5.5	1	4.92	4.52	6.87	2.631	4.72	26.31	523	0.179399
MVZ	40599	MVZ40599	Crotalus lepidus	Crotalus_lepidus_MVZ_40599	49.2	4	1	5.17	4.65	4.43	2.422	4.91	24.22	492	0.202725
MVZ	44755	MVZ44755	Crotalus lepidus	Crotalus_lepidus_MVZ_44755	54.8	4.9	1	5.49	4.8	5.17	2.632	5.145	26.32	548	0.195479
MVZ	58350	MVZ58350	Crotalus lepidus	Crotalus_lepidus_MVZ_58350	52.9	4.3	1	5.33	5.62	5.62	2.787	5.475	27.87	529	0.196448
MVZ	58351	MVZ58351	Crotalus lepidus	Crotalus_lepidus_MVZ_58351	59	5.5	1	5.24	5.69	7.98	2.697	5.465	26.97	590	0.202633
MVZ	58352	MVZ58352	Crotalus lepidus	Crotalus_lepidus_MVZ_58352	43	4	1	3.73	4.13	4.3	2.173	3.93	21.73	430	0.180856
MVZ	67200	MVZ67200	Crotalus lepidus	Crotalus_lepidus_MVZ_67200	51.5	4.4	1	3.99	4.56	6.31	2.59	4.275	25.9	515	0.165058
MVZ	67227	MVZ67227	Crotalus lepidus	Crotalus_lepidus_MVZ_67227	59	5	1	5.05	5.29	5.88	2.653	5.17	26.53	590	0.194874
MVZ	67229	MVZ67229	Crotalus lepidus	Crotalus_lepidus_MVZ_67229	64.7	5.2	1	5.51	5.49	6.95	2.991	5.5	29.91	647	0.183885
MVZ	67231	MVZ67231	Crotalus lepidus	Crotalus_lepidus_MVZ_67231	59	5.1	1	5.24	5.34	5.78	2.521	5.29	25.21	590	0.209837
MVZ	68225	MVZ68225	Crotalus lepidus	Crotalus_lepidus_MVZ_68225	40.6	3.8	1	2.96	3.07	5.08	2.024	3.015	20.24	406	0.148962
MVZ	68888	MVZ68888	Crotalus lepidus	Crotalus_lepidus_MVZ_68888	51.7	4.6	1		4.85	6.08	2.553	4.85	25.53	517	0.189973
MVZ	68890	MVZ68890	Crotalus lepidus	Crotalus_lepidus_MVZ_68890	81.2	6.6	1	5.51	5.64	7.19	3.739	5.575	37.39	812	0.149104
MVZ	71018	MVZ71018	Crotalus lepidus	Crotalus_lepidus_MVZ_71018	39.2	2.4	2	3.72	3.35	4.52	1.989	3.535	19.89	392	0.177728
MVZ	73094	MVZ73094	Crotalus lepidus	Crotalus_lepidus_MVZ_73094	53	3.9	1	3.85	4.34	5.12	2.427	4.095	24.27	530	0.168727
MVZ	84508	MVZ84508	Crotalus lepidus	Crotalus_lepidus_MVZ_84508	61.2	6	1	4.72	4.82	628	2.813	4.77	28.13	612	0.16957
MVZ	98611	MVZ98611	Crotalus lepidus	Crotalus_lepidus_MVZ_98611	73.4	5.5	1	4.57	5.59	6.39	2.824	5.08	28.24	734	0.179887
UTA	35041		Crotalus lepidus	Crotalus_lepidus_UTA_35041	48.8	4.8	1	4.63	4.99	5.43	2.483	4.81	24.83	488	0.193717
MVZ	76503	MVZ76503	Crotalus ruber	Crotalus_lorenzoensis_MVZ_76503	60.5	4.2	1	6.74	6.8	5.56	2.865	6.77	28.65	605	0.2363
MVZ	76504	MVZ76504	Crotalus ruber	Crotalus_lorenzoensis_MVZ_76504	95.5	6	1	8.92	10.93	7.98	3.595	9.925	35.95	955	0.276078
MVZ	76505	MVZ76505	Crotalus ruber	Crotalus_lorenzoensis_MVZ_76505	95.5	7.1	1	9.99	9.73	9.36	3.747	9.86	37.47	955	0.263144
LACM	104962	LACM104962	Crotalus mitchellii	Crotalus_mitchelli_LACM_104962	83	5.5	2	7.65	7.68	8.1	3.299	7.665	32.99	830	0.232343
LACM	134439	LACM134439	Crotalus mitchellii	Crotalus_mitchelli_LACM_134439	55.4	3.4	2	6.25	6.38	6.45	2.738	6.315	27.38	554	0.230643
LACM	25083	LACM25083	Crotalus mitchellii	Crotalus_mitchelli_LACM_25083	86	7	1	7.4	7.09	8.64	3.337	7.245	33.37	860	0.217111
LACM	25084	LACM25084	Crotalus mitchellii	Crotalus_mitchelli_LACM_25084	68.2	5.8	1	5.93	6.49	7.21	2.85	6.21	28.5	682	0.217895
LACM	74029	LACM74029	Crotalus mitchellii	Crotalus_mitchelli_LACM_74029	82.5	7.3	1	8.49	7.7	9	3.396	8.095	33.96	825	0.238369
CAS	81355	CAS81355	Crotalus mitchellii	Crotalus_mitchelli_muertensis_CAS_81355	49.1	2.8	2	5.78	6.02	6.96	2.539	5.9	25.39	491	0.232375
CAS	81356	CAS81356	Crotalus mitchellii	Crotalus_mitchelli_muertensis_CAS_81356	43.3	2.6	2	3.78	4.26	5.89	2.325	4.02	23.25	433	0.172903
CAS	81357	CAS81357	Crotalus mitchellii	Crotalus_mitchelli_muertensis_CAS_81357	41	2.3	2		4.51	4.85	2.201	4.51	22.01	410	0.204907
CAS	81358	CAS81358	Crotalus mitchellii	Crotalus_mitchelli_muertensis_CAS_81358	44.3	2.4	2	4.85	5.09	5.24	2.299	4.97	22.99	443	0.216181
CAS	81359	CAS81359	Crotalus mitchellii	Crotalus_mitchelli_muertensis_CAS_81359	50.1	3.8	1	4.81	5.57	5.23	2.403	5.19	24.03	501	0.21598
CAS	81360	CAS81360	Crotalus mitchellii	Crotalus_mitchelli_muertensis_CAS_81360	54	3.4	1	5.92	5.97	6.81	2.855	5.945	28.55	540	0.208231
CAS	81361	CAS81361	Crotalus mitchellii	Crotalus_mitchelli_muertensis_CAS_81361	51.3	2.8	1	4.38	5.08	6.36	2.656	4.73	26.56	513	0.178087
CAS	81362	CAS81362	Crotalus mitchellii	Crotalus_mitchelli_muertensis_CAS_81362	43.8	2.6	1	4.52		4.67	2.153	4.52	21.53	438	0.20994
CAS	81363	CAS81363	Crotalus mitchellii	Crotalus_mitchelli_muertensis_CAS_81363	60	4	1	6.99	6.79	6.49	2.81	6.89	28.1	600	0.245196
MVZ	10867	MVZ10867	Crotalus stephensi	Crotalus_mitchelli_MVZ_10867	86.6	6.4	1	7.66	8.08	8.71	3.275	7.87	32.75	866	0.240305
MVZ	11924	MVZ11924	Crotalus mitchellii	Crotalus_mitchelli_MVZ_11924	68.5	4.8	1	6.61	6.54	7.39	2.917	6.575	29.17	685	0.225403
MVZ	13102	MVZ13102	Crotalus stephensi	Crotalus_mitchelli_MVZ_13102	69.7	4	2	7.4	7.02	8.93	2.983	7.21	29.83	697	0.241703
MVZ	13793	MVZ13793	Crotalus mitchellii	Crotalus_mitchelli_MVZ_13793	85	7	1	8.83	9.1	8.11	3.297	8.965	32.97	850	0.271914
MVZ	140884	MVZ140884	Crotalus mitchellii	Crotalus_mitchelli_MVZ_140884	66.4	3.3	2	6.52	7.45	6.58	3.009	6.985	30.09	664	0.232137
MVZ	147961	MVZ147961	Crotalus stephensi	Crotalus_mitchelli_MVZ_147961	78.5	7.1	1	7.05	6.88	10.82	3.14	6.965	31.4	785	0.221815
MVZ	161442	MVZ161442	Crotalus mitchellii	Crotalus_mitchelli_MVZ_161442	63	5.4	1	7.72	7.85	8.74	2.747	7.785	27.47	630	0.2834
MVZ	161443	MVZ161443	Crotalus mitchellii	Crotalus_mitchelli_MVZ_161443	65.7	6	1	5.98	6.17	8.74	2.868	6.075	28.68	657	0.21182
MVZ	182176	MVZ182176	Crotalus mitchellii	Crotalus_mitchelli_MVZ_182176	55	4.2	1	7.17	6.62	6.2	2.607	6.895	26.07	550	0.26448
MVZ	1829	MVZ1829	Crotalus mitchellii	Crotalus_mitchelli_MVZ_1829	51.3	2.5	2	6.48	6.38	6.3	2.387	6.43	23.87	513	0.269376
MVZ	1832	MVZ1832	Crotalus mitchellii	Crotalus_mitchelli_MVZ_1832	71.1	5.4	1		9.61	9.24	3.507	9.61	35.07	711	0.274023
MVZ	190033	MVZ190033	Crotalus mitchellii	Crotalus_mitchelli_MVZ_190033	61.9	4.4	1	6.69	6.52	7.06	2.674	6.605	26.74	619	0.247008
MVZ	204994	MVZ204994	Crotalus mitchellii	Crotalus_mitchelli_MVZ_204994	66.5	4	2	6.9	6.41	7.34	2.888	6.655	28.88	665	0.230436
MVZ	204995	MVZ204995	Crotalus mitchellii	Crotalus_mitchelli_MVZ_204995	64.7	3.8	2	6.47	6.75	7.54	2.854	6.61	28.54	647	0.231605
MVZ	205573	MVZ205573	Crotalus mitchellii	Crotalus_mitchelli_MVZ_205573	70.4	4.5	1	7.15	7.44	6.37	2.972	7.295	29.72	704	0.245458
MVZ	229958	MVZ229958	Crotalus mitchellii	Crotalus_mitchelli_MVZ_229958	91	6	2	10.07	9.26	8.15	3.772	9.665	37.72	910	0.25623
MVZ	233709	MVZ233709	Crotalus mitchellii	Crotalus_mitchelli_MVZ_233709	64.8	4.2	2	7.25	6.14	6.85	2.838	6.695	28.38	648	0.235906
MVZ	24202	MVZ24202	Crotalus mitchellii	Crotalus_mitchelli_MVZ_24202	71.8	5	1	8.37	9.03	6.83	3.4	8.7	34	718	0.255882
MVZ	27031	MVZ27031	Crotalus mitchellii	Crotalus_mitchelli_MVZ_27031	118	7.2	1	14.08	12.64	13.98	5.198	13.36	51.98	1180	0.257022
MVZ	41139	MVZ41139	Crotalus mitchellii	Crotalus_mitchelli_MVZ_41139	95.3	5.3	1	9.87	10.6	8.44	3.801	10.235	38.01	953	0.269271
MVZ	41140	MVZ41140	Crotalus mitchellii	Crotalus_mitchelli_MVZ_41140	87.5	4.7	2	11.12		8.65	3.963	11.12	39.63	875	0.280596
MVZ	43036	MVZ43036	Crotalus mitchellii	Crotalus_mitchelli_MVZ_43036	90.5	4.7	2	11.97	11.85	8.8	3.819	11.91	38.19	905	0.311862
MVZ	44688	MVZ44688	Crotalus mitchellii	Crotalus_mitchelli_MVZ_44688	75.2	5.9	1	10.28	9.34	8.33	3.54	9.81	35.4	752	0.277119
MVZ	50177	MVZ50177	Crotalus mitchellii	Crotalus_mitchelli_MVZ_50177	90.2	5.5	2	7.96	8.42	7.78	3.227	8.19	32.27	902	0.253796
MVZ	52012	MVZ52012	Crotalus mitchellii	Crotalus_mitchelli_MVZ_52012	106.3	6.5	1	13.34	11.55	11.37	4.438	12.445	44.38	1063	0.280419
MVZ	52014	MVZ52014	Crotalus mitchellii	Crotalus_mitchelli_MVZ_52014	85	4.6	2	9.14	9.91	8.37	3.685	9.525	36.85	850	0.25848
MVZ	54594	MVZ54594	Crotalus stephensi	Crotalus_mitchelli_MVZ_54594	58.5	5.2	1	5.71	5.86	5.59	2.558	5.785	25.58	585	0.226153
MVZ	60720	MVZ60720	Crotalus stephensi	Crotalus_mitchelli_MVZ_60720	68.5	6.6	1	6.43	7.48	6.73	3.163	6.955	31.63	685	0.219886
MVZ	67329	MVZ67329	Crotalus mitchellii	Crotalus_mitchelli_MVZ_67329	61.5	5	1	6.49	7.89	5.69	2.785	7.19	27.85	615	0.258169
MVZ	71877	MVZ71877	Crotalus mitchellii	Crotalus_mitchelli_MVZ_71877	71.3	3.6	2	7.99	7.78	7.93	2.954	7.885	29.54	713	0.266926
MVZ	72420	MVZ72420	Crotalus mitchellii	Crotalus_mitchelli_MVZ_72420	68	4.7	1	7.1	7.96	8.64	3.088	7.53	30.88	680	0.243847
MVZ	9814	MVZ9814	Crotalus mitchellii	Crotalus_mitchelli_MVZ_9814	95.8	7.2	1	10.47	11.37	8.58	3.951	10.92	39.51	958	0.276386
CAS	228045	CAS228045	Crotalus mitchellii	Crotalus_mitchelli_pyrrhus_CAS_228045	99	6.7	1	11.56	11.57	10.17	4.421	11.565	44.21	990	0.261592
CAS	228047	CAS228047	Crotalus mitchellii	Crotalus_mitchelli_pyrrhus_CAS_228047	77.2	4.7	1	8.5	8.99	8.2	3.369	8.745	33.69	772	0.259573
CAS	259887	CAS259887	Crotalus mitchellii	Crotalus_mitchelli_pyrrhus_CAS_259887	59.8	3.7	2	7.25	8.23	7.21	2.896	7.74	28.96	598	0.267265
UIMNH	27755	UIMNH27755	Crotalus mitchellii	Crotalus_mitchelli_pyrrhus_UIMNH_27755	74	5.6	1	7.05	8.3	8.13	3.276	7.675	32.76	740	0.23428
UIMNH	78773	UIMNH78773	Crotalus mitchellii	Crotalus_mitchelli_pyrrhus_UIMNH_78773	48	3	1	4.97	4.85	5.05	2.358	4.91	23.58	480	0.208227
UTA	7622		Crotalus mitchellii	Crotalus_mitchellii_muertensis_UTA_7622	60.1	4	2	7.99	7.15	6.53	2.703	7.57	27.03	601	0.280059
CAS	192760	CAS192760	Crotalus molossus	Crotalus_molossus_CAS_192760	79.8	6.4	1	10.21	11.03	11.06	4.434	10.62	44.34	798	0.239513
CAS	192762	CAS192762	Crotalus molossus	Crotalus_molossus_CAS_192762	91	6.9	1	14.28	13.73	11.4	4.923	14.005	49.23	910	0.284481
CAS	204095	CAS204095	Crotalus ornatus	Crotalus_molossus_CAS_204095	100.8	7.2	1	14.02	13.87	11.4	4.853	13.945	48.53	1008	0.287348
CAS	14020	CAS14020	Crotalus molossus	Crotalus_molossus_estebanensis_CAS_14020	88.3	6.7	1	12.14	12.01	6.71	4.116	12.075	41.16	883	0.293367
LACM	116255	LACM116255	Crotalus ornatus	Crotalus_molossus_LACM_116255	78.1	4.6	2	11.65	11.27	9.17	4.209	11.46	42.09	781	0.272274
LACM	138220	LACM138220	Crotalus molossus	Crotalus_molossus_LACM_138220	65	4.4	2	9.4	9.78	9.47	3.466	9.59	34.66	650	0.276688
LACM	138221	LACM138221	Crotalus molossus	Crotalus_molossus_LACM_138221	63.1	3.7	2	9.18	9.8	9.57	3.42	9.49	34.2	631	0.277485
LACM	138222	LACM138222	Crotalus molossus	Crotalus_molossus_LACM_138222	64.8	5.1	1	8.14	8.65	7.29	3.373	8.395	33.73	648	0.248888
MVZ	136787	MVZ136787	Crotalus molossus	Crotalus_molossus_MVZ_136787	95.5	5.3	2	11.76	12.31	12.22	4.525	12.035	45.25	955	0.265967
MVZ	18960	MVZ18960	Crotalus molossus	Crotalus_molossus_MVZ_18960	79.3	5	1	11.44	11.85	9.16	3.679	11.645	36.79	793	0.316526
MVZ	196877	MVZ196877	Crotalus molossus	Crotalus_molossus_MVZ_196877	91.6	9.6	1	13.7	12.7	7.8	4.474	13.2	44.74	916	0.295038
MVZ	209116	MVZ209116	Crotalus molossus	Crotalus_molossus_MVZ_209116	84.2	5.3	1	11.87	11.62	6.99	4.403	11.745	44.03	842	0.26675
MVZ	209117	MVZ209117	Crotalus molossus	Crotalus_molossus_MVZ_209117	83.5	6.6	1	13.78	12.78	10.81	4.446	13.28	44.46	835	0.298695
MVZ	209118	MVZ209118	Crotalus molossus	Crotalus_molossus_MVZ_209118	93	7.1	1	14.64	14.65	10.75	4.699	14.645	46.99	930	0.311662
MVZ	209119	MVZ209119	Crotalus molossus	Crotalus_molossus_MVZ_209119	74	5.4	1	11.21	11.14	9.26	3.915	11.175	39.15	740	0.285441
MVZ	209120	MVZ209120	Crotalus molossus	Crotalus_molossus_MVZ_209120	106.1	8.5	1	14.74	16.1	11.16	5.582	15.42	55.82	1061	0.276245
MVZ	215708	MVZ215708	Crotalus molossus	Crotalus_molossus_MVZ_215708	81	5.4	1	11.86	10.92	8.19	4.742	11.39	47.42	810	0.240194
MVZ	215709	MVZ215709	Crotalus molossus	Crotalus_molossus_MVZ_215709	84.5	4.4	2	12.94	12.15	9.05	4.509	12.545	45.09	845	0.278221
MVZ	215710	MVZ215710	Crotalus molossus	Crotalus_molossus_MVZ_215710	82.1	5	2	11.8	12.9	12.5	4.409	12.35	44.09	821	0.280109
MVZ	217630	MVZ217630	Crotalus molossus	Crotalus_molossus_MVZ_217630	84.8	4.2	2	12.46	12.2	10.17	4.697	12.33	46.97	848	0.262508
MVZ	217631	MVZ217631	Crotalus molossus	Crotalus_molossus_MVZ_217631	79	5	1	10.97	10.22	10.83	3.676	10.595	36.76	790	0.288221
MVZ	229806	MVZ229806	Crotalus molossus	Crotalus_molossus_MVZ_229806	97.2	7	1	12.17	12.93	11.33	5.118	12.55	51.18	972	0.245213
MVZ	229807	MVZ229807	Crotalus molossus	Crotalus_molossus_MVZ_229807	67.3	5.5	1	10.2	9.05	8.42	3.536	9.625	35.36	673	0.2722
MVZ	229823	MVZ229823	Crotalus molossus	Crotalus_molossus_MVZ_229823	92	7	1	12.37	12.68	8.01	4.745	12.525	47.45	920	0.263962
MVZ	229824	MVZ229824	Crotalus molossus	Crotalus_molossus_MVZ_229824	84.5	5.1	1	11.5	11.62	9.52	4.608	11.56	46.08	845	0.250868
MVZ	229874	MVZ229874	Crotalus molossus	Crotalus_molossus_MVZ_229874	76.1	5.9	1	10.35	9.88	8.73	4.156	10.115	41.56	761	0.243383
MVZ	229965	MVZ229965	Crotalus molossus	Crotalus_molossus_MVZ_229965	117	6	2	14.79	13.65	12.11	5.197	14.22	51.97	1170	0.273619
MVZ	253456	MVZ253456	Crotalus molossus	Crotalus_molossus_MVZ_253456	96	7	1	12.57	12.02	11.31	4.895	12.295	48.95	960	0.251175
MVZ	275516	MVZ275516	Crotalus molossus	Crotalus_molossus_MVZ_275516	75.3	4.72	2	10.62	11.02	8.68	3.786	10.82	37.86	753	0.28579
MVZ	275523	MVZ275523	Crotalus molossus	Crotalus_molossus_MVZ_275523	99	8.6	1	14.04	14.21	12.71	5.731	14.125	57.31	990	0.246467
MVZ	275524	MVZ275524	Crotalus molossus	Crotalus_molossus_MVZ_275524	83.1	4	2	12.21	12.85	11.35	4.771	12.53	47.71	831	0.262628
MVZ	277706	MVZ277706	Crotalus molossus	Crotalus_molossus_MVZ_277706	106.8	7.1	1	14.08	14.9	9.19	5.305	14.49	53.05	1068	0.273139
MVZ	277707	MVZ277707	Crotalus molossus	Crotalus_molossus_MVZ_277707	109	8.5	1	15.38	15.83	10.35	5.441	15.605	54.41	1090	0.286804
MVZ	36490	MVZ36490	Crotalus molossus	Crotalus_molossus_MVZ_36490	93.4	7.3	1	13.3	14.56	11.68	4.899	13.93	48.99	934	0.284344
MVZ	58349	MVZ58349	Crotalus ornatus	Crotalus_molossus_MVZ_58349	111.3	7.8	1	13.83	13.59	12.54	5.136	13.71	51.36	1113	0.266939
MVZ	66881	MVZ66881	Crotalus molossus	Crotalus_molossus_MVZ_66881	101	107.8	1	13.07	13.94	9.44	4.701	13.505	47.01	1010	0.287279
MVZ	67207	MVZ67207	Crotalus molossus	Crotalus_molossus_MVZ_67207	80.8	4.7	1	12.13	10.99	8.18	4.107	11.56	41.07	808	0.281471
MVZ	67212	MVZ67212	Crotalus molossus	Crotalus_molossus_MVZ_67212	87	7.2	1	12.12	12.26	8.93	4.499	12.19	44.99	870	0.270949
MVZ	67214	MVZ67214	Crotalus molossus	Crotalus_molossus_MVZ_67214	93.9	6.4	1	13.4	12.7	8.91	4.543	13.05	45.43	939	0.287255
MVZ	68904	MVZ68904	Crotalus molossus	Crotalus_molossus_MVZ_68904	93	5	1	12.57	11.93	7.64	4.554	12.25	45.54	930	0.268994
MVZ	68906	MVZ68906	Crotalus molossus	Crotalus_molossus_MVZ_68906	81.5	4.3	2	10.96	11.45	8.08	4.286	11.205	42.86	815	0.261433
MVZ	68907	MVZ68907	Crotalus molossus	Crotalus_molossus_MVZ_68907	68.4	4.1	1	9.21	9.04	7.08	3.714	9.125	37.14	684	0.245692
MVZ	68908	MVZ68908	Crotalus molossus	Crotalus_molossus_MVZ_68908	89	4.8	1	12.04	11.69	9.77	4.628	11.865	46.28	890	0.256374
MVZ	68968	MVZ68968	Crotalus molossus	Crotalus_molossus_MVZ_68968	76.6	4.3	2	11.69	9.99	6.04	4.064	10.84	40.64	766	0.266732
MVZ	70297	MVZ70297	Crotalus molossus	Crotalus_molossus_MVZ_70297	83.5	6	1	11.86	11.61	11.7	4.554	11.735	45.54	835	0.257686
MVZ	73102	MVZ73102	Crotalus molossus	Crotalus_molossus_MVZ_73102	104.3	7.4	1	15.01	15.52	11.33	4.792	15.265	47.92	1043	0.318552
MVZ	73103	MVZ73103	Crotalus molossus	Crotalus_molossus_MVZ_73103	92	5.2	1	11.9	11.27	9.24	4.098	11.585	40.98	920	0.282699
MVZ	73105	MVZ73105	Crotalus molossus	Crotalus_molossus_MVZ_73105	106	7.6	1	15.13	14.13	11.3	5.032	14.63	50.32	1060	0.290739
MVZ	78066	MVZ78066	Crotalus molossus	Crotalus_molossus_MVZ_78066	64.8	4	1	9.9	9.47	7.81	3.165	9.685	31.65	648	0.306003
CAS	120881	CAS120881	Crotalus molossus	Crotalus_molossus_nigrescens_CAS_120881	95.1	7	1	12.64	12.77	8.46	4.946	12.705	49.46	951	0.256874
CAS	142782	CAS142782	Crotalus molossus	Crotalus_molossus_nigrescens_CAS_142782	102.1	9.5	1	13.46	12.53	11.26	5.538	12.995	55.38	1021	0.234651
CAS	165227	CAS165227	Crotalus molossus	Crotalus_molossus_nigrescens_CAS_165227	79.3	6.3	1	12.41	12.4	8.93	4.352	12.405	43.52	793	0.285041
CAS	169826	CAS169826	Crotalus molossus	Crotalus_molossus_nigrescens_CAS_169826	76.3	4.8	1	11.37	11.39	9.51	4.177	11.38	41.77	763	0.272444
CAS	87332	CAS87332	Crotalus molossus	Crotalus_molossus_nigrescens_CAS_87332	69.5	4.1	2		11.56	12.32	4.072	11.56	40.72	695	0.28389
UIMNH	22804	UIMNH22804	Crotalus molossus	Crotalus_molossus_nigrescens_UIMNH_22804	79.6	4.3	2	12.61	13.33	8.72	3.93	12.97	39.3	796	0.330025
UTA	5114		Crotalus molossus	Crotalus_molossus_nigrescens_UTA_5114	81.3	4.8	2	12.34	12.91	9.96	4.662	12.625	46.62	813	0.270807
UTA	12571	UTA12571	Crotalus molossus	Crotalus_molossus_UTA_12571	71.9	7	1	11.93	13.02	8.98	4.353	12.475	43.53	719	0.286584
UTA	12581	UTA12581	Crotalus molossus	Crotalus_molossus_UTA_12581	89	5.3	2	14.32	14.81	11.74	4.705	14.565	47.05	890	0.309564
UTA	12582	UTA12582	Crotalus molossus	Crotalus_molossus_UTA_12582	89	8.4	1	15.72	15.94	11.73	5.107	15.83	51.07	890	0.309967
UTA	5113		Crotalus molossus	Crotalus_molossus_UTA_5113	96.2	7.4	1	14.79	13.98	11.77	5.446	14.385	54.46	962	0.264139
ASU	17601	ASU17601	Crotalus morulus	Crotalus_morulus_ASU_17601	46	3.7	1	4.53	4.95	4.88	2.626	4.74	26.26	460	0.180503
UTA	25409		Crotalus morulus	Crotalus_morulus_UTA_25409	38.6	3.3	2	4.03	4.14	4.85	2.196	4.085	21.96	386	0.18602
UTA	8339		Crotalus morulus	Crotalus_morulus_UTA_8339	46	4.5	1	4.69	4.77	5.54	2.423	4.73	24.23	460	0.195213
LACM	105215	LACM105215	Crotalus oreganus	Crotalus_oreganus_helleri_LACM_105215	65.5	4.3	2	7.07	7.86	7.16	3.336	7.465	33.36	655	0.223771
LACM	105216	LACM105216	Crotalus oreganus	Crotalus_oreganus_helleri_LACM_105216	69	5.6	1	7.85	7.89	8.47	3.521	7.87	35.21	690	0.223516
LACM	20139	LACM20139	Crotalus oreganus	Crotalus_oreganus_helleri_LACM_20139	56	4.4	1	7.08	7.31	6.78	3.04	7.195	30.4	560	0.236678
LACM	20143	LACM20143	Crotalus oreganus	Crotalus_oreganus_helleri_LACM_20143	69.7	5.9	1	8.65	8.59	8.61	3.506	8.62	35.06	697	0.245864
LACM	20146	LACM20146	Crotalus oreganus	Crotalus_oreganus_helleri_LACM_20146	82	6.8	1	11.13	11.42	10.99	4.319	11.275	43.19	820	0.261056
LACM	75227	LACM75227	Crotalus oreganus	Crotalus_oreganus_helleri_LACM_75227	110.5	9.2	1		13.96	10.49	5.172	13.96	51.72	1105	0.269915
LACM	105185	LACM105185	Crotalus oreganus	Crotalus_oreganus_LACM_105185	59.3	3.3	2	5.4	6.05	6.23	2.733	5.725	27.33	593	0.209477
LACM	105186	LACM105186	Crotalus oreganus	Crotalus_oreganus_LACM_105186	62.8	5	1	5.43	6.38	7.48	2.748	5.905	27.48	628	0.214884
LACM	132107	LACM132107	Crotalus oreganus	Crotalus_oreganus_LACM_132107	72.4	5.5	1	7.67	7.99	8.82	3.458	7.83	34.58	724	0.226431
LACM	3057	LACM3057	Crotalus oreganus	Crotalus_oreganus_LACM_3057	74.9	6.1	1	8.76	9.2	8.2	3.655	8.98	36.55	749	0.245691
LACM	3059	LACM3059	Crotalus oreganus	Crotalus_oreganus_LACM_3059	57.6	5	1	6.3	6.41	7.03	3.061	6.355	30.61	576	0.207612
MVZ	12011	MVZ12011	Crotalus oreganus	Crotalus_oreganus_MVZ_12011	82.6	6.8	1		9.42	10.87	3.861	9.42	38.61	826	0.243978
MVZ	13828	MVZ13828	Crotalus oreganus	Crotalus_oreganus_MVZ_13828	83.5	4.3	1	8.31	8.91	8.57	3.559	8.61	35.59	835	0.241922
MVZ	147963	MVZ147963	Crotalus oreganus	Crotalus_oreganus_MVZ_147963	75.1	4.5	2	8.26	8.54	8.45	3.456	8.4	34.56	751	0.243056
MVZ	150250	MVZ150250	Crotalus oreganus	Crotalus_oreganus_MVZ_150250	72	4.2	1	8.49	8.35	10.84	3.813	8.42	38.13	720	0.220823
MVZ	173061	MVZ173061	Crotalus oreganus	Crotalus_oreganus_MVZ_173061	88.5	6	1	10.91	11.4	11.37	4.382	11.155	43.82	885	0.254564
MVZ	17619	MVZ17619	Crotalus oreganus	Crotalus_oreganus_MVZ_17619	71.6	5.6	1	7.99	8.26	7.33	3.226	8.125	32.26	716	0.25186
MVZ	18406	MVZ18406	Crotalus oreganus	Crotalus_oreganus_MVZ_18406	88	6	1	9.78	9.39	7.88	3.615	9.585	36.15	880	0.265145
MVZ	191355	MVZ191355	Crotalus oreganus	Crotalus_oreganus_MVZ_191355	71	4	2	8.14	8.02	9.19	3.469	8.08	34.69	710	0.23292
MVZ	192218	MVZ192218	Crotalus oreganus	Crotalus_oreganus_MVZ_192218	63	3.5	2	7.25	7.14	8.27	3.164	7.195	31.64	630	0.227402
MVZ	19365	MVZ19365	Crotalus oreganus	Crotalus_oreganus_MVZ_19365	84	5.1	2	9.75	10.27	10.47	3.943	10.01	39.43	840	0.253868
MVZ	206223	MVZ206223	Crotalus oreganus	Crotalus_oreganus_MVZ_206223	80.5	7.1	1	9.16	9.14	9.63	4.101	9.15	41.01	805	0.223116
MVZ	21917	MVZ21917	Crotalus oreganus	Crotalus_oreganus_MVZ_21917	74	7	1	8.95	9.62	7.42	3.816	9.285	38.16	740	0.243318
MVZ	228715	MVZ228715	Crotalus oreganus	Crotalus_oreganus_MVZ_228715	69.1	5.5	1	8.02	7.54	6.26	3.167	7.78	31.67	691	0.245658
MVZ	229948	MVZ229948	Crotalus oreganus	Crotalus_oreganus_MVZ_229948	85.8	7.2	1	9.1	10.1	9.1	3.798	9.6	37.98	858	0.252765
MVZ	229967	MVZ229967	Crotalus cerberus	Crotalus_oreganus_MVZ_229967	75	5.4	1	9.6	9.24	8.94	3.58	9.42	35.8	750	0.263128
MVZ	229968	MVZ229968	Crotalus cerberus	Crotalus_oreganus_MVZ_229968	69.5	4.1	2	7.82	7.68	8.06	3.544	7.75	35.44	695	0.218679
MVZ	245843	MVZ245843	Crotalus oreganus	Crotalus_oreganus_MVZ_245843	86.8	6	1	9.43	9.81	10.03	4.18	9.62	41.8	868	0.230144
MVZ	245847	MVZ245847	Crotalus oreganus	Crotalus_oreganus_MVZ_245847	101.3	7.3	1	11.34	11.69	11.68	4.865	11.515	48.65	1013	0.236691
MVZ	245848	MVZ245848	Crotalus oreganus	Crotalus_oreganus_MVZ_245848	75.3	4.9	2	8.91	8.52	10.74	3.457	8.715	34.57	753	0.252097
MVZ	24838	MVZ24838	Crotalus oreganus	Crotalus_oreganus_MVZ_24838	80	6	1	8.86	7.03	9.01	3.503	7.945	35.03	800	0.226806
MVZ	24840	MVZ24840	Crotalus oreganus	Crotalus_oreganus_MVZ_24840	67.5	4	2	6.2	6.38	10.27	2.95	6.29	29.5	675	0.21322
MVZ	2733	MVZ2733	Crotalus oreganus	Crotalus_oreganus_MVZ_2733	92.5	6.4	1	10.13	9.7	11.77	3.797	9.915	37.97	925	0.261127
MVZ	2773	MVZ2773	Crotalus oreganus	Crotalus_oreganus_MVZ_2773	63.4	4	1	8	8.01	8.32	2.975	8.005	29.75	634	0.269076
MVZ	2776	MVZ2776	Crotalus oreganus	Crotalus_oreganus_MVZ_2776	67.8	4.5	1	9.22	9.21	7.59	3.486	9.215	34.86	678	0.264343
MVZ	2777	MVZ2777	Crotalus oreganus	Crotalus_oreganus_MVZ_2777	94.3	6.7	1	9.49	9.59	8.86	3.877	9.54	38.77	943	0.246067
MVZ	277766	MVZ277766	Crotalus oreganus	Crotalus_oreganus_MVZ_277766	62.5	5	1	6.97	7.64	8.3	2.976	7.305	29.76	625	0.245464
MVZ	277767	MVZ277767	Crotalus oreganus	Crotalus_oreganus_MVZ_277767	71.4	4.3	2	8.63	8.98	7.23	3.626	8.805	36.26	714	0.24283
MVZ	277768	MVZ277768	Crotalus oreganus	Crotalus_oreganus_MVZ_277768	75	4.3	1	9.12	8.82	6.33	3.685	8.97	36.85	750	0.243419
MVZ	277771	MVZ277771	Crotalus oreganus	Crotalus_oreganus_MVZ_277771	87	7	1	12.05	11.26	9.17	4.323	11.655	43.23	870	0.269604
MVZ	277773	MVZ277773	Crotalus oreganus	Crotalus_oreganus_MVZ_277773	75.2	4.8	2	8.33	8.42	8.19	3.476	8.375	34.76	752	0.240938
MVZ	2779	MVZ2779	Crotalus oreganus	Crotalus_oreganus_MVZ_2779	61.2	3	2	7.58	6.82	6.81	2.883	7.2	28.83	612	0.24974
MVZ	2782	MVZ2782	Crotalus oreganus	Crotalus_oreganus_MVZ_2782	82.5	5.7	1	9.83	8.62	9.82	3.639	9.225	36.39	825	0.253504
MVZ	28214	MVZ28214	Crotalus oreganus	Crotalus_oreganus_MVZ_28214	80.5	6.8	1	8.41	9.88	10.72	3.67	9.145	36.7	805	0.249183
MVZ	28216	MVZ28216	Crotalus oreganus	Crotalus_oreganus_MVZ_28216	77	6.4	1	8	8.13	9.69	3.699	8.065	36.99	770	0.218032
MVZ	28217	MVZ28217	Crotalus oreganus	Crotalus_oreganus_MVZ_28217	74	6.5	1	8.59	8.92	8.21	3.717	8.755	37.17	740	0.235539
MVZ	28218	MVZ28218	Crotalus oreganus	Crotalus_oreganus_MVZ_28218	72	6	1	7.71	8.32	10.07	3.571	8.015	35.71	720	0.224447
MVZ	29335	MVZ29335	Crotalus oreganus	Crotalus_oreganus_MVZ_29335	100.5	8.5	1	12.15	11.32	12.55	4.904	11.735	49.04	1005	0.239294
MVZ	31841	MVZ31841	Crotalus oreganus	Crotalus_oreganus_MVZ_31841	84	6.9	1	9	9.41	10.19	4.129	9.205	41.29	840	0.222935
MVZ	33912	MVZ33912	Crotalus oreganus	Crotalus_oreganus_MVZ_33912	69.2	6	1	7.74	8.43	7.06	3.614	8.085	36.14	692	0.223713
MVZ	34936	MVZ34936	Crotalus oreganus	Crotalus_oreganus_MVZ_34936	66.6	4	2	6.99	7.23	8.33	3.232	7.11	32.32	666	0.219988
MVZ	3606	MVZ3606	Crotalus oreganus	Crotalus_oreganus_MVZ_3606	85	7.8	1	10.62	9.79	11.97	4.37	10.205	43.7	850	0.233524
MVZ	3607	MVZ3607	Crotalus oreganus	Crotalus_oreganus_MVZ_3607	92.5	7.1	1	11.54	10.25	10.89	4.069	10.895	40.69	925	0.267756
MVZ	3799	MVZ3799	Crotalus oreganus	Crotalus_oreganus_MVZ_3799	76.6	6.8	1	9.33	9.5	8.91	3.617	9.415	36.17	766	0.260299
MVZ	3800	MVZ3800	Crotalus oreganus	Crotalus_oreganus_MVZ_3800	84.5	7.1	1	9.99	9.05	8.43	3.622	9.52	36.22	845	0.262838
MVZ	41172	MVZ41172	Crotalus oreganus	Crotalus_oreganus_MVZ_41172	85.5	5.1	2	9.64	9.68	8.81	4.175	9.66	41.75	855	0.231377
MVZ	41226	MVZ41226	Crotalus oreganus	Crotalus_oreganus_MVZ_41226	120.2	10.4	1	12.95	12.63	9.55	5.187	12.79	51.87	1202	0.246578
MVZ	42651	MVZ42651	Crotalus oreganus	Crotalus_oreganus_MVZ_42651	71.1	5	1	9.18	8.31	9.28	3.514	8.745	35.14	711	0.248862
MVZ	42653	MVZ42653	Crotalus oreganus	Crotalus_oreganus_MVZ_42653	78.5	6.5	1	9.35	9.47	11.07	4.125	9.41	41.25	785	0.228121
MVZ	42654	MVZ42654	Crotalus oreganus	Crotalus_oreganus_MVZ_42654	83.3	7	1	9.95	10.07	9.45	4.146	10.01	41.46	833	0.241438
MVZ	42657	MVZ42657	Crotalus oreganus	Crotalus_oreganus_MVZ_42657	91.8	7.4	1	10.68	9.87	12.61	4.582	10.275	45.82	918	0.224247
MVZ	42658	MVZ42658	Crotalus oreganus	Crotalus_oreganus_MVZ_42658	113.9	9	1	12.23	12.83	15.95	4.52	12.53	45.2	1139	0.277212
MVZ	42662	MVZ42662	Crotalus oreganus	Crotalus_oreganus_MVZ_42662	118.5	11.2	1	10.63	11.36	14.92	4.78	10.995	47.8	1185	0.230021
MVZ	42663	MVZ42663	Crotalus oreganus	Crotalus_oreganus_MVZ_42663	71.1	4.2	2	8.73	9	7.52	3.634	8.865	36.34	711	0.243946
MVZ	42669	MVZ42669	Crotalus oreganus	Crotalus_oreganus_MVZ_42669	106	9	1	12.7	13.33	9.86	4.889	13.015	48.89	1060	0.26621
MVZ	42671	MVZ42671	Crotalus oreganus	Crotalus_oreganus_MVZ_42671	79.3	5	1	9.47	9.28	9.98	3.65	9.375	36.5	793	0.256849
MVZ	42674	MVZ42674	Crotalus oreganus	Crotalus_oreganus_MVZ_42674	79.5	4.9	2	9.65	9.93	9.4	4.33	9.79	43.3	795	0.226097
MVZ	42678	MVZ42678	Crotalus oreganus	Crotalus_oreganus_MVZ_42678	67.7	4.2	1	8.4	8.29	7.16	3.153	8.345	31.53	677	0.264669
MVZ	42683	MVZ42683	Crotalus oreganus	Crotalus_oreganus_MVZ_42683	95.5	9.6	1	12.35	12.29	11.46	4.861	12.32	48.61	955	0.253446
MVZ	44864	MVZ44864	Crotalus oreganus	Crotalus_oreganus_MVZ_44864	61.8	4.9	1	7.54	6.92	8.95	3.185	7.23	31.85	618	0.227002
MVZ	44905	MVZ44905	Crotalus oreganus	Crotalus_oreganus_MVZ_44905	78.1	5	2	8.84	7.34	9.13	3.735	8.09	37.35	781	0.2166
MVZ	45734	MVZ45734	Crotalus oreganus	Crotalus_oreganus_MVZ_45734	84.3	8	1	11.6	9.8	8.06	3.744	10.7	37.44	843	0.285791
MVZ	4903	MVZ4903	Crotalus oreganus	Crotalus_oreganus_MVZ_4903	77	5.7	1	9.48	9.47	7.19	3.315	9.475	33.15	770	0.285822
MVZ	56722	MVZ56722	Crotalus oreganus	Crotalus_oreganus_MVZ_56722	77.3	5.4	1	9.14	9.21	7.17	4.22	9.175	42.2	773	0.217417
MVZ	56723	MVZ56723	Crotalus oreganus	Crotalus_oreganus_MVZ_56723	95	7	1	11	11.13	10.81	4.825	11.065	48.25	950	0.229326
MVZ	56724	MVZ56724	Crotalus oreganus	Crotalus_oreganus_MVZ_56724	90.7	5.2	1	9.87	10.7	11.89	4.403	10.285	44.03	907	0.233591
MVZ	62079	MVZ62079	Crotalus oreganus	Crotalus_oreganus_MVZ_62079	86	5.6	1	9.56	9.59	7.85	3.972	9.575	39.72	860	0.241062
MVZ	6277	MVZ6277	Crotalus oreganus	Crotalus_oreganus_MVZ_6277	69.1	5.1	1	7.99	7.95	7.36	3.269	7.97	32.69	691	0.243805
MVZ	6278	MVZ6278	Crotalus oreganus	Crotalus_oreganus_MVZ_6278	80.5	6	1	10.6	9.7	7.7	3.948	10.15	39.48	805	0.257092
MVZ	64148	MVZ64148	Crotalus oreganus	Crotalus_oreganus_MVZ_64148	86.7	7	1	10.15	10.07	9.49	4.089	10.11	40.89	867	0.247249
MVZ	6839	MVZ6839	Crotalus oreganus	Crotalus_oreganus_MVZ_6839	65.4	3.8	2	7.28	7.15	6.98	2.92	7.215	29.2	654	0.247089
MVZ	6840	MVZ6840	Crotalus oreganus	Crotalus_oreganus_MVZ_6840	62	5.2	1	8.49	7.7	6.3	2.868	8.095	28.68	620	0.282252
MVZ	6841	MVZ6841	Crotalus oreganus	Crotalus_oreganus_MVZ_6841	70	4	2	8.4	8.15	6.77	3.303	8.275	33.03	700	0.25053
MVZ	79235	MVZ79235	Crotalus oreganus	Crotalus_oreganus_MVZ_79235	68.5	4.31	1	8.06	7.4	9.49	3.352	7.73	33.52	685	0.230609
MVZ	81066	MVZ81066	Crotalus oreganus	Crotalus_oreganus_MVZ_81066	74.4	7	1	9.44	9.32	7.11	3.95	9.38	39.5	744	0.237468
MVZ	8651	MVZ8651	Crotalus oreganus	Crotalus_oreganus_MVZ_8651	93	5.8	1	9.18	9.74	11.28	4.354	9.46	43.54	930	0.217271
MVZ	9469	MVZ9469	Crotalus oreganus	Crotalus_oreganus_MVZ_9469	88	4.7	2	9.25	9.1	9.8	3.899	9.175	38.99	880	0.235317
UTA	17866		Crotalus oreganus	Crotalus_oreganus_UTA_17866	69.1	6.3	1	9.49	8.84	9.36	3.681	9.165	36.81	691	0.248981
UTA	50758		Crotalus oreganus	Crotalus_oreganus_UTA_50758	69.1	6.1	1	8.74	9.05	7.67	3.303	8.895	33.03	691	0.269301
UTA	14614	UTA14614	Crotalus ornatus	Crotalus_ornatus_UTA_14614	85.6	5.2	2	14.54	14.24	10.69	4.328	14.39	43.28	856	0.332486
UTA	1611	UTA1611	Crotalus ornatus	Crotalus_ornatus_UTA_1611	76	6.1	1	12.46	12.72	7.73	4.031	12.59	40.31	760	0.312329
UTA	22362	UTA22362	Crotalus ornatus	Crotalus_ornatus_UTA_22362	92.2	5.7	2	14.48	14.98	10.47	4.933	14.73	49.33	922	0.298601
UTA	22364	UTA22364	Crotalus ornatus	Crotalus_ornatus_UTA_22364	84.3	6.4	1	14.06	14.07	10.13	4.339	14.065	43.39	843	0.324153
UTA	22399	UTA22399	Crotalus ornatus	Crotalus_ornatus_UTA_22399	76.7	5.1	2	13.6	13.51	10.07	4.122	13.555	41.22	767	0.328845
UTA	32828	UTA32828	Crotalus ornatus	Crotalus_ornatus_UTA_32828	97.5	7.3	1	15.81	16.68	9.53	4.639	16.245	46.39	975	0.350183
UTA	33	UTA33	Crotalus ornatus	Crotalus_ornatus_UTA_33	109.1	18	1	17.94	17.76	11.74	5.429	17.85	54.29	1091	0.32879
UTA	34139	UTA34139	Crotalus ornatus	Crotalus_ornatus_UTA_34139	87.6	5.6	2	14.69	15.31	9.49	4.826	15	48.26	876	0.310816
UTA	485	UTA485	Crotalus ornatus	Crotalus_ornatus_UTA_485	75	4.3	2	12.96	12.13	8.62	3.948	12.545	39.48	750	0.317756
UTA	59134	UTA59134	Crotalus ornatus	Crotalus_ornatus_UTA_59134	73.6	6	1	11.4	11.14	8.11	3.648	11.27	36.48	736	0.308936
UTA	8371	UTA8371	Crotalus ornatus	Crotalus_ornatus_UTA_8371	93	7.6	1	14.76	15.51	13.48	5.008	15.135	50.08	930	0.302216
CAS	255394	CAS255394	Crotalus polystictus	Crotalus_polystictus_CAS_255394	65.7	5.4	1	9.9	9.34	7.9	2.735	9.62	27.35	657	0.351737
CAS	5278	CAS5278	Crotalus polystictus	Crotalus_polystictus_CAS_5278	64.8	4.2	2	11.07	10.36	6.53	3.412	10.715	34.12	648	0.314039
UIMNH	22820	UIMNH22820	Crotalus polystictus	Crotalus_polystictus_UIMNH_22820	64	4.7	1	9.94	11.61	7.12	3.581	10.775	35.81	640	0.300894
UIMNH	62407	UIMNH62407	Crotalus polystictus	Crotalus_polystictus_UIMNH_62407	68.6	5.6	1	12.91	13.99	9.44	3.87	13.45	38.7	686	0.347545
UTA	12585	UTA12585	Crotalus polystictus	Crotalus_polystictus_UTA_12585	50.4	3.4	2	9.44	8.71	4.88	2.877	9.075	28.77	504	0.315433
UTA	12786	UTA12786	Crotalus polystictus	Crotalus_polystictus_UTA_12786	76.2	4.9	2	13.78	12.61	8.72	4.026	13.195	40.26	762	0.327745
UTA	13624	UTA13624	Crotalus polystictus	Crotalus_polystictus_UTA_13624	76	4.6	2	12.15	12.04	7.25	4.212	12.095	42.12	760	0.287156
UTA	16281	UTA16281	Crotalus polystictus	Crotalus_polystictus_UTA_16281	75.2	5.8	1	15.9	14.28	9.89	4.104	15.09	41.04	752	0.36769
UTA	32428	UTA32428	Crotalus polystictus	Crotalus_polystictus_UTA_32428	54.5	3.7	2	11.44	11.13	6.53	2.968	11.285	29.68	545	0.380222
UTA	32429	UTA32429	Crotalus polystictus	Crotalus_polystictus_UTA_32429	79.2	6.7	1	13.99	14.74	9.07	4.198	14.365	41.98	792	0.342187
UTA	38547	UTA38547	Crotalus polystictus	Crotalus_polystictus_UTA_38547	83.9	4.7	2	12.94	13.8	7.78	4.293	13.37	42.93	839	0.311437
UTA	4000	UTA4000	Crotalus polystictus	Crotalus_polystictus_UTA_4000	46.4	4.2	1	7.15	8	3.87	2.335	7.575	23.35	464	0.324411
UTA	4499	UTA4499	Crotalus polystictus	Crotalus_polystictus_UTA_4499	58.1	5.1	1	10.11	9.16	6.64	3.227	9.635	32.27	581	0.298575
UTA	4906	UTA4906	Crotalus polystictus	Crotalus_polystictus_UTA_4906	66.2	4.7	1	11.27	11.5	5.22	3.473	11.385	34.73	662	0.327815
UTA	4907	UTA4907	Crotalus polystictus	Crotalus_polystictus_UTA_4907	58.3	3.7	2	9.75	10.43	5.48	2.784	10.09	27.84	583	0.362428
UTA	4908	UTA4908	Crotalus polystictus	Crotalus_polystictus_UTA_4908	61.9	4.3	1	11.26	12.05	5.97	3.589	11.655	35.89	619	0.324742
UTA	5666	UTA5666	Crotalus polystictus	Crotalus_polystictus_UTA_5666	42.5	3	2	6.88	7.33	4.38	2.351	7.105	23.51	425	0.302212
UTA	58262	UTA58262	Crotalus polystictus	Crotalus_polystictus_UTA_58262	46.2	3	2	8.12	8.34	6	2.872	8.23	28.72	462	0.28656
UTA	58263	UTA58263	Crotalus polystictus	Crotalus_polystictus_UTA_58263	52.1	3.1	2	8.67	8.17	5.55	2.825	8.42	28.25	521	0.298053
UTA	58264	UTA58264	Crotalus polystictus	Crotalus_polystictus_UTA_58264	52.7	3.8	1	9.7	9.41	5.41	3.184	9.555	31.84	527	0.300094
UTA	58365	UTA58365	Crotalus polystictus	Crotalus_polystictus_UTA_58365	54.1	3	2	8.84	8	5.09	3.046	8.42	30.46	541	0.276428
UTA	6822	UTA6822	Crotalus polystictus	Crotalus_polystictus_UTA_6822	42.3	3.5	1	7.33	7.65	4.16	2.557	7.49	25.57	423	0.292921
UTA	6823	UTA6823	Crotalus polystictus	Crotalus_polystictus_UTA_6823	46.4	3.7	1	7.41	7.96	4.52	2.723	7.685	27.23	464	0.282225
UTA	6927	UTA6927	Crotalus polystictus	Crotalus_polystictus_UTA_6927	77.4	6.2	1	14.89	13.11	8.13	4.956	14	49.56	774	0.282486
CAS	87134	CAS87134	Crotalus pricei	Crotalus_pricei_miquihuanus_CAS_87134	35.3	4.2	1	2.63	2.96	4.92	2.014	2.795	20.14	353	0.138779
MVZ	129355	MVZ129355	Crotalus pricei	Crotalus_pricei_MVZ_129355	34.5	3	1	2.99	3.39	3.85	1.872	3.19	18.72	345	0.170406
MVZ	49992	MVZ49992	Crotalus pricei	Crotalus_pricei_MVZ_49992	49	4.9	1	3.12	3.03	5.76	2.266	3.075	22.66	490	0.135702
MVZ	49993	MVZ49993	Crotalus pricei	Crotalus_pricei_MVZ_49993	41.5	3.3	1	3.2	3.43	3.81	1.966	3.315	19.66	415	0.168616
MVZ	59313	MVZ59313	Crotalus pricei	Crotalus_pricei_MVZ_59313	33.6	2.9	1	3.09	3.05	4.03	1.885	3.07	18.85	336	0.162865
MVZ	59314	MVZ59314	Crotalus pricei	Crotalus_pricei_MVZ_59314	45.3	3.9	1	3.5	3.57	4.56	2.314	3.535	23.14	453	0.152766
MVZ	59315	MVZ59315	Crotalus pricei	Crotalus_pricei_MVZ_59315	34.8	2.9	1	3.25	3.3	4.9	2.038	3.275	20.38	348	0.160697
MVZ	66883	MVZ66883	Crotalus pricei	Crotalus_pricei_MVZ_66883	40.8	3.3	1	3.34	3.56	4.13	2.3	3.45	23	408	0.15
MVZ	67197	MVZ67197	Crotalus pricei	Crotalus_pricei_MVZ_67197	48	4.5	1	3.3	4.23	4.636	2.638	3.765	26.38	480	0.142722
MVZ	68901	MVZ68901	Crotalus pricei	Crotalus_pricei_MVZ_68901	66.4	5.9	1	4.04	3.93	5.79	3.083	3.985	30.83	664	0.129257
MVZ	68902	MVZ68902	Crotalus pricei	Crotalus_pricei_MVZ_68902	47.4	3.7	1	3.83	4.2	5.49	2.403	4.015	24.03	474	0.167083
MVZ	70296	MVZ70296	Crotalus pricei	Crotalus_pricei_MVZ_70296	40.9	3.1	2	2.96	3.38	4.2	2.193	3.17	21.93	409	0.144551
MVZ	71021	MVZ71021	Crotalus pricei	Crotalus_pricei_MVZ_71021	56.5	5.5	1	3.86	4.32	5.55	2.701	4.09	27.01	565	0.151425
MVZ	71023	MVZ71023	Crotalus pricei	Crotalus_pricei_MVZ_71023	38.2	3.7	1	3.2	2.83	5.18	2.217	3.015	22.17	382	0.135995
MVZ	71024	MVZ71024	Crotalus pricei	Crotalus_pricei_MVZ_71024	52	5.7	1	4.25	3.84	5.1	2.581	4.045	25.81	520	0.156722
MVZ	71025	MVZ71025	Crotalus pricei	Crotalus_pricei_MVZ_71025	47.6	4	1	3.12	3.75	4.37	2.383	3.435	23.83	476	0.144146
MVZ	73095	MVZ73095	Crotalus pricei	Crotalus_pricei_MVZ_73095	41	3.3	1	3.05	3.08	5.02	2.131	3.065	21.31	410	0.143829
MVZ	73097	MVZ73097	Crotalus pricei	Crotalus_pricei_MVZ_73097	44.5	4.2	1	3.41	3.39	4.03	2.422	3.4	24.22	445	0.14038
MVZ	7968	MVZ7968	Crotalus pricei	Crotalus_pricei_MVZ_7968	46	3.8	1	2.84	2.97	5.58	2.469	2.905	24.69	460	0.117659
MVZ	7969	MVZ7969	Crotalus pricei	Crotalus_pricei_MVZ_7969	48.3	4.7	1	4.34	4.45	5.92	3.033	4.395	30.33	483	0.144906
UIMNH	17550	UIMNH17550	Crotalus pricei	Crotalus_pricei_pricei_UIMNH_17550	52.2	4.5	1	3.54	4.35	5.44	2.61	3.945	26.1	522	0.151149
UIMNH	24547	UIMNH24547	Crotalus pricei	Crotalus_pricei_pricei_UIMNH_24547	59.6	4.4	1	3.6	3.5	4.92	2.786	3.55	27.86	596	0.127423
UIMNH	78774	UIMNH78774	Crotalus pricei	Crotalus_pricei_pricei_UIMNH_78774	35.1	3.7	1	4.26	3.94	4.33	2.345	4.1	23.45	351	0.17484
UIMNH	78775	UIMNH78775	Crotalus pricei	Crotalus_pricei_pricei_UIMNH_78775	37.8	3.9	1	3.64	4.55	4.52	2.436	4.095	24.36	378	0.168103
UIMNH	78776	UIMNH78776	Crotalus pricei	Crotalus_pricei_pricei_UIMNH_78776	38.2	3.2	1	3.3	3.93	3.68	2.149	3.615	21.49	382	0.168218
UIMNH	93534	UIMNH93534	Crotalus pricei	Crotalus_pricei_pricei_UIMNH_93534	38.2	3.2	1	4.02	3.94	4.39	2.431	3.98	24.31	382	0.163719
UIMNH	93535	UIMNH93535	Crotalus pricei	Crotalus_pricei_pricei_UIMNH_93535	42	2.8	1	3.64	4.14	4.63	2.073	3.89	20.73	420	0.187651
UIMNH	93536	UIMNH93536	Crotalus pricei	Crotalus_pricei_pricei_UIMNH_93536	40.5	4.3	1	3.78	4.66	4.81	2.803	4.22	28.03	405	0.150553
UTA	10047		Crotalus pricei	Crotalus_pricei_UTA_10047	46.4	3.4	1	3.68	3.63	4.94	2.475	3.655	24.75	464	0.147677
LACM	25947	LACM25947	Crotalus pusillus	Crotalus_pusillus_LACM_25947	50	5	2	6.75	6.76	6.87	2.855	6.755	28.55	500	0.236602
UTA	5846	UTA5846	Crotalus pusillus	Crotalus_pusillus_UTA_5846	48.3	6.2	1	5.91	5.5	4.38	2.723	5.705	27.23	483	0.209512
UTA	9358	UTA9358	Crotalus pusillus	Crotalus_pusillus_UTA_9358	48.5	5.6	1	6.65	5.95	6.49	3.014	6.3	30.14	485	0.209025
UTA	51392		Crotalus mitchellii	Crotalus_pyrrus_UTA_51392	71.7	6	1	9.99	10.49	10.82	3.85	10.24	38.5	717	0.265974
CAS	134051	CAS134051	Crotalus ravus	Crotalus_ravus_CAS_134051	45.6	4.3	2	5.16	4.92	4.75	2.442	5.04	24.42	456	0.206388
CAS	16201	CAS16201	Crotalus ravus	Crotalus_ravus_CAS_16201	50.1	5.2	1	6.86	6.37	6.64	2.931	6.615	29.31	501	0.225691
UTA	4533	UTA4533	Crotalus ravus	Crotalus_ravus_exiguus_UTA_4533	46.3	5.2	1	7.93	7.68	5.76	3.022	7.805	30.22	463	0.258273
UTA	4535	UTA4535	Crotalus ravus	Crotalus_ravus_exiguus_UTA_4535	53.3	5.9	1	9.48	8.96	7.23	3.392	9.22	33.92	533	0.271816
UTA	4536	UTA4536	Crotalus ravus	Crotalus_ravus_exiguus_UTA_4536	51.5	5.4	1	8.46	8.55	6.64	3.259	8.505	32.59	515	0.26097
UTA	5663	UTA5663	Crotalus ravus	Crotalus_ravus_exiguus_UTA_5663	53	5.5	1	9.28	8.51	5.87	3.261	8.895	32.61	530	0.272769
UTA	5664	UTA5664	Crotalus ravus	Crotalus_ravus_exiguus_UTA_5664	44.2	3.3	2	6.97	6.73	4.52	2.848	6.85	28.48	442	0.24052
UTA	5665	UTA5665	Crotalus ravus	Crotalus_ravus_exiguus_UTA_5665	51.5	5.7	1	7.54	7.44	6.01	3.145	7.49	31.45	515	0.238156
UTA	6117	UTA6117	Crotalus ravus	Crotalus_ravus_exiguus_UTA_6117	52.3	5.7	1	8.85	9.01	7.08	3.329	8.93	33.29	523	0.268249
UTA	6226	UTA6226	Crotalus ravus	Crotalus_ravus_exiguus_UTA_6226	61.5	6.5	1	9.4	9.3	7.53	3.675	9.35	36.75	615	0.254422
UTA	7221	UTA7221	Crotalus ravus	Crotalus_ravus_exiguus_UTA_7221	56.5	5.3	1	9.14	9.21	6.82	3.464	9.175	34.64	565	0.264867
LACM	67177	LACM67177	Crotalus ravus	Crotalus_ravus_LACM_67177	47.5	5	1	6.94	6.94	6.74	2.744	6.94	27.44	475	0.252915
MVZ	112414	MVZ112414	Crotalus ravus	Crotalus_ravus_MVZ_112414	72.4	6.8	1	8.67	9.12	7.51	3.683	8.895	36.83	724	0.241515
MVZ	164794	MVZ164794	Crotalus ravus	Crotalus_ravus_MVZ_164794	50.1	3.8	1	5.77	6.39	4.9	2.786	6.08	27.86	501	0.218234
MVZ	275530	MVZ275530	Crotalus ravus	Crotalus_ravus_MVZ_275530	49.3	3.6	1	6.36	6.68	7.07	2.723	6.52	27.23	493	0.239442
MVZ	45254	MVZ45254	Crotalus ravus	Crotalus_ravus_MVZ_45254	38	3.2	1	4.86	5.24	5.7	2.532	5.05	25.32	380	0.199447
UTA	10295		Crotalus ravus	Crotalus_ravus_UTA_10295	44.5	4.1	2	6.37	6.76	5.97	2.819	6.565	28.19	445	0.232884
UTA	12613		Crotalus ravus	Crotalus_ravus_UTA_12613	61.7	6.6	1	7.81	8.23	6.65	2.99	8.02	29.9	617	0.268227
UTA	32620		Crotalus ravus	Crotalus_ravus_UTA_32620	60.8	6.9	1	7.26	7.52	6.97	3.397	7.39	33.97	608	0.217545
CAS	259881	CAS259881	Crotalus ruber	Crotalus_ruber_CAS_259881	77.8	4.6	2	11.12	11.35	10.61	3.656	11.235	36.56	778	0.307303
CAS	259888	CAS259888	Crotalus ruber	Crotalus_ruber_CAS_259888	66	5.2	1	7.56	8.01	6.67	3.451	7.785	34.51	660	0.225587
CAS	259892	CAS259892	Crotalus ruber	Crotalus_ruber_CAS_259892	96.3	7	1	11.14	11.88	7.53	4.358	11.51	43.58	963	0.264112
CAS	55796	CAS55796	Crotalus ruber	Crotalus_ruber_CAS_55796	92.1	5.6	2	13.01	12.25	8.28	4.577	12.63	45.77	921	0.275945
LACM	105004	LACM105004	Crotalus ruber	Crotalus_ruber_LACM_105004	107.7	8.5	1	15.05	14.37	12.31	5.329	14.71	53.29	1077	0.276037
LACM	105006	LACM105006	Crotalus ruber	Crotalus_ruber_LACM_105006	78.3	6.6	1		10.54	8.83	4.277	10.54	42.77	783	0.246434
LACM	105007	LACM105007	Crotalus ruber	Crotalus_ruber_LACM_105007	84.5	5.4	2		11.54	9.08	4.508	11.54	45.08	845	0.255989
LACM	105010	LACM105010	Crotalus ruber	Crotalus_ruber_LACM_105010	73	4.3	2		9.09	8.28	3.511	9.09	35.11	730	0.258901
LACM	105011	LACM105011	Crotalus ruber	Crotalus_ruber_LACM_105011	83	5.7	1	10.46	11.5	9.25	3.995	10.98	39.95	830	0.274844
LACM	105013	LACM105013	Crotalus ruber	Crotalus_ruber_LACM_105013	83.7	5	2	11.01	11.13	10.93	4.494	11.07	44.94	837	0.246328
LACM	105014	LACM105014	Crotalus ruber	Crotalus_ruber_LACM_105014	65.5	4.1	2	9.26	8.53	8.85	3.681	8.895	36.81	655	0.241646
LACM	105030	LACM105030	Crotalus ruber	Crotalus_ruber_LACM_105030	81.5	6.4	1	10.93	11.33	8.77	4.187	11.13	41.87	815	0.265823
LACM	126080	LACM126080	Crotalus ruber	Crotalus_ruber_LACM_126080	139	10	1	17.57	14.45	14.25	6.297	16.01	62.97	1390	0.254248
LACM	134041	LACM134041	Crotalus ruber	Crotalus_ruber_LACM_134041	72.9	5.9	1	9.98	9.75	7.88	3.919	9.865	39.19	729	0.251722
LACM	152527	LACM152527	Crotalus ruber	Crotalus_ruber_LACM_152527	115.5	9.7	1		15.09	11.2	6.22	15.09	62.2	1155	0.242605
LACM	152528	LACM152528	Crotalus ruber	Crotalus_ruber_LACM_152528	121	9	1	17.14		10.12	5.936	17.14	59.36	1210	0.288747
LACM	159017	LACM159017	Crotalus ruber	Crotalus_ruber_LACM_159017	113.8	8.8	1	14.8	14.72	11.55	5.342	14.76	53.42	1138	0.276301
LACM	20015	LACM20015	Crotalus ruber	Crotalus_ruber_LACM_20015	97	7.3	1	14.3	13.34	11.21	5.145	13.82	51.45	970	0.26861
LACM	3040	LACM3040	Crotalus ruber	Crotalus_ruber_LACM_3040	103.5	7.6	1	15.01	14.48	10.63	5.108	14.745	51.08	1035	0.288665
LACM	52562	LACM52562	Crotalus ruber	Crotalus_ruber_LACM_52562	78.6	6.3	1	9.18	10.07	11.31	4.016	9.625	40.16	786	0.239666
LACM	52563	LACM52563	Crotalus ruber	Crotalus_ruber_LACM_52563	112.5	8.6	1	16.2	15.26	13.81	5.755	15.73	57.55	1125	0.273328
CAS	121006	CAS121006	Crotalus ruber	Crotalus_ruber_lorenzoensis_CAS_121006	68	4.2	1	8.45	7.84	6.68	3.108	8.145	31.08	680	0.262066
CAS	51257	CAS51257	Crotalus ruber	Crotalus_ruber_lorenzoensis_CAS_51257	69.7	4.4	1	7.77	8.68	8.85	3.401	8.225	34.01	697	0.241841
CAS	51258	CAS51258	Crotalus ruber	Crotalus_ruber_lorenzoensis_CAS_51258	87	6.7	1	9.18	9.84	9.59	3.842	9.51	38.42	870	0.247527
CAS	104358	CAS104358	Crotalus ruber	Crotalus_ruber_lucasensis_CAS_104358	100.2	8.4	1		13.14	9.41	4.754	13.14	47.54	1002	0.276399
CAS	14024	CAS14024	Crotalus ruber	Crotalus_ruber_lucasensis_CAS_14024	101.3	6.8	1	13.05	14.42	9.8	5.38	13.735	53.8	1013	0.255297
CAS	142780	CAS142780	Crotalus ruber	Crotalus_ruber_lucasensis_CAS_142780	86.6	5.4	1	12.41	12.75	9.59	4.071	12.58	40.71	866	0.309015
CAS	142781	CAS142781	Crotalus ruber	Crotalus_ruber_lucasensis_CAS_142781	87.8	4.7	1	10.8	11.24	9.63	4.747	11.02	47.47	878	0.232147
CAS	152232	CAS152232	Crotalus ruber	Crotalus_ruber_lucasensis_CAS_152232	85.3		1	11.04	11.59	10.43	4.228	11.315	42.28	853	0.267621
CAS	53719	CAS53719	Crotalus ruber	Crotalus_ruber_lucasensis_CAS_53719	90.5	5.2	2	12.01	11.89	10.23	4.611	11.95	46.11	905	0.259163
CAS	170519	CAS170519	Crotalus scutulatus	Crotalus_scutulatus_CAS_170519	104.8	8.5	1	11.79	12.08	11.3	4.218	11.935	42.18	1048	0.282954
CAS	259909	CAS259909	Crotalus scutulatus	Crotalus_scutulatus_CAS_259909	67.7	5.3	1	7.78	8.07	7.23	3.009	7.925	30.09	677	0.263377
CAS	259910	CAS259910	Crotalus scutulatus	Crotalus_scutulatus_CAS_259910	73	4.3	2	8.35	8.79	6.92	3.429	8.57	34.29	730	0.249927
CAS	259911	CAS259911	Crotalus scutulatus	Crotalus_scutulatus_CAS_259911	52.4	3.3	2	6.12	6.6	6.76	2.834	6.36	28.34	524	0.224418
CAS	259916	CAS259916	Crotalus scutulatus	Crotalus_scutulatus_CAS_259916	81.2	5.9	1		7.85	6.95	3.372	7.85	33.72	812	0.2328
CAS	65692	CAS65692	Crotalus scutulatus	Crotalus_scutulatus_CAS_65692	83.6	7.2	1	7.96	8.71	8.68	3.837	8.335	38.37	836	0.217227
CAS	65693	CAS65693	Crotalus scutulatus	Crotalus_scutulatus_CAS_65693	80.6	7.5	1	8.9	9.65	8.33	3.735	9.275	37.35	806	0.248327
CAS	65694	CAS65694	Crotalus scutulatus	Crotalus_scutulatus_CAS_65694	88.6	6.8	1	8.44	9.27	7.62	3.693	8.855	36.93	886	0.239778
LACM	105056	LACM105056	Crotalus scutulatus	Crotalus_scutulatus_LACM_105056	67.3	5.7	1	7.33	7.81	6.92	3.413	7.57	34.13	673	0.221799
LACM	105100	LACM105100	Crotalus scutulatus	Crotalus_scutulatus_LACM_105100	70	6.1	1	7.76	8.03	8.94	3.409	7.895	34.09	700	0.231593
LACM	105102	LACM105102	Crotalus scutulatus	Crotalus_scutulatus_LACM_105102	65	4.6	2	6.48	6.48	7.16	3.416	6.48	34.16	650	0.189696
LACM	116024	LACM116024	Crotalus scutulatus	Crotalus_scutulatus_LACM_116024	76	6.5	1	8.23	8.1	8.98	3.545	8.165	35.45	760	0.230324
LACM	181633	LACM181633	Crotalus scutulatus	Crotalus_scutulatus_LACM_181633	90.8	7.4	1	8.9	9.99	9.71	3.758	9.445	37.58	908	0.25133
LACM	181645	LACM181645	Crotalus scutulatus	Crotalus_scutulatus_LACM_181645	79.6	6.3	1	7.85	8.59	10.02	3.435	8.22	34.35	796	0.239301
LACM	181646	LACM181646	Crotalus scutulatus	Crotalus_scutulatus_LACM_181646	70.4	5.7	1	7.77	7.06	8.22	2.916	7.415	29.16	704	0.254287
LACM	181650	LACM181650	Crotalus scutulatus	Crotalus_scutulatus_LACM_181650	69.5	5.5	1	7.92	8.36	9.17	3.279	8.14	32.79	695	0.248246
LACM	181652	LACM181652	Crotalus scutulatus	Crotalus_scutulatus_LACM_181652	79.8	6.6	1		8.35	8.69	3.549	8.35	35.49	798	0.235278
LACM	20036	LACM20036	Crotalus scutulatus	Crotalus_scutulatus_LACM_20036	89	7.5	1	8.73	8.58	11.57	3.869	8.655	38.69	890	0.223701
LACM	28805	LACM28805	Crotalus scutulatus	Crotalus_scutulatus_LACM_28805	88.1	6.9	1	9.52	9.69	9.83	3.769	9.605	37.69	881	0.254842
LACM	2978	LACM2978	Crotalus scutulatus	Crotalus_scutulatus_LACM_2978	54.4	3.4	2	7.21	6.69	7.51	3.091	6.95	30.91	544	0.224846
LACM	2979	LACM2979	Crotalus scutulatus	Crotalus_scutulatus_LACM_2979	82	7	1	9.48	9.3	10.23	3.762	9.39	37.62	820	0.249601
LACM	2981	LACM2981	Crotalus scutulatus	Crotalus_scutulatus_LACM_2981	76.1	4.6	2	8.8		8.49	3.684	8.8	36.84	761	0.238871
LACM	2983	LACM2983	Crotalus scutulatus	Crotalus_scutulatus_LACM_2983	84		1	9	9	7.6	3.544	9	35.44	840	0.25395
LACM	69907	LACM69907	Crotalus scutulatus	Crotalus_scutulatus_LACM_69907	81.7	7	1	8.89	9.55	8.9	3.609	9.22	36.09	817	0.255472
LACM	9212	LACM9212	Crotalus scutulatus	Crotalus_scutulatus_LACM_9212	56.8	3.7	2	6.92	7.46	7.85	2.843	7.19	28.43	568	0.252902
UIMNH	6269	UIMNH6269	Crotalus simus	Crotalus_simus_UIMNH_6269	77.2	6	1	12.52	13.63	7.87	4.373	13.075	43.73	772	0.298994
UIMNH	6270	UIMNH6270	Crotalus simus	Crotalus_simus_UIMNH_6270	109	8.5	1	14.06	14.15	10.07	5.484	14.105	54.84	1090	0.257203
UTA	34547	UTA34547	Crotalus simus	Crotalus_simus_UTA_34547	87.2	7.4	1	12.91	13.39	9.13	4.27	13.15	42.7	872	0.307963
UTA	52032	UTA52032	Crotalus simus	Crotalus_simus_UTA_52032	114.5	13.4	1	17.51	18.71	10.45	5.663	18.11	56.63	1145	0.319795
UTA	52497	UTA52497	Crotalus simus	Crotalus_simus_UTA_52497	87	9	1	13.55	15.12	8.29	4.576	14.335	45.76	870	0.313265
UTA	5252	UTA5252	Crotalus simus	Crotalus_simus_UTA_5252	119.8	15.4	1	15.32		8.65	5.208	15.32	52.08	1198	0.294163
LACM	37718	LACM37718	Crotalus stejnegeri	Crotalus_stejnegeri_LACM_37718	51.5	8.2	1	8.3	8.13	6.16	2.816	8.215	28.16	515	0.291726
UTA	5926	UTA5926	Crotalus stejnegeri	Crotalus_stejnegeri_UTA_5926	32.9	4.1	1	6.19	6.63	3.43	2.043	6.41	20.43	329	0.313754
UTA	6234	UTA6234	Crotalus stejnegeri	Crotalus_stejnegeri_UTA_6234	55.2	8.3	1	8.96	8.85	4.24	2.767	8.905	27.67	552	0.321829
CAS	103471	CAS103471	Crotalus angelensis	Crotalus_stephensi_CAS_103471	48.2	2.3	2	5.84	6.16	5.87	2.52	6	25.2	482	0.238095
CAS	15627	CAS15627	Crotalus stephensi	Crotalus_stephensi_CAS_15627	75.1	6.9	1	8.86	9.37	10.01	3.659	9.115	36.59	751	0.249112
CAS	165197	CAS165197	Crotalus stephensi	Crotalus_stephensi_CAS_165197	73.8	6.5	1	8.63	8.64	8.29	3.726	8.635	37.26	738	0.23175
CAS	255809	CAS255809	Crotalus stephensi	Crotalus_stephensi_CAS_255809	60.3	4.1	2	6.92	6.55	7.29	2.892	6.735	28.92	603	0.232884
CAS	50869	CAS50869	Crotalus angelensis	Crotalus_stephensi_CAS_50869	94.6	7.4	1	8.8	9.37	12.5	4.933	9.085	49.33	946	0.184168
CAS	65186	CAS65186	Crotalus stephensi	Crotalus_stephensi_CAS_65186	75.7	4	2	7.67	8.33	10.31	3.478	8	34.78	757	0.230017
CAS	65379	CAS65379	Crotalus stephensi	Crotalus_stephensi_CAS_65379	62.6	3.8	2	6.59	6.05	7.07	2.951	6.32	29.51	626	0.214165
CAS	89397	CAS89397	Crotalus stephensi	Crotalus_stephensi_CAS_89397	74	5.5	1	8.08	8.51	8.41	3.238	8.295	32.38	740	0.256177
CAS	89596	CAS89596	Crotalus stephensi	Crotalus_stephensi_CAS_89596	81.2	6.7	1	10.49	10.13	8.19	3.892	10.31	38.92	812	0.264902
LACM	186667	LACM186667	Crotalus stephensi	Crotalus_stephensi_LACM_186667	82.5	7.7	1	9.05	9.48	9.54	3.859	9.265	38.59	825	0.240088
LACM	187151	LACM187151	Crotalus stephensi	Crotalus_stephensi_LACM_187151	74	4.3	2	7.06	7.27	8.91	3.077	7.165	30.77	740	0.232857
LACM	187158	LACM187158	Crotalus stephensi	Crotalus_stephensi_LACM_187158	68.2	5.4	1	6.57	7.13	7.94	2.912	6.85	29.12	682	0.235234
LACM	187990	LACM187990	Crotalus stephensi	Crotalus_stephensi_LACM_187990	61.6	4.1	2	6.47	7.08	8.15	2.87	6.775	28.7	616	0.236063
LACM	188019	LACM188019	Crotalus stephensi	Crotalus_stephensi_LACM_188019	60.3	5.2	1	6.51	6.9	5.96	2.769	6.705	27.69	603	0.242145
LACM	188020	LACM188020	Crotalus stephensi	Crotalus_stephensi_LACM_188020	78.8	6.8	1	8.94	9.14	8.71	3.599	9.04	35.99	788	0.251181
LACM	188021	LACM188021	Crotalus stephensi	Crotalus_stephensi_LACM_188021	56.3	3.9	2	5.49	6.21	6.47	2.792	5.85	27.92	563	0.209527
UTA	51441		Crotalus stephensi	Crotalus_stephensi_UTA_51441	72.7	6.5	1	9.35	9.88	8.64	3.416	9.615	34.16	727	0.28147
UTA	52401		Crotalus tancitarensis	Crotalus_tancitarensis_UTA_52401	36.4	3.2	2	3.07	2.71	4.34	1.966	2.89	19.66	364	0.146999
CAS	12780	CAS12780	Crotalus tigris	Crotalus_tigris_CAS_12780	64.4	4.7	1	4.68	5.17	4.98	2.693	4.925	26.93	644	0.182882
CAS	140516	CAS140516	Crotalus tigris	Crotalus_tigris_CAS_140516	57.4	5.2	1	5.76	6.03	5.52	2.512	5.895	25.12	574	0.234674
LACM	105109	LACM105109	Crotalus tigris	Crotalus_tigris_LACM_105109	63.3	4.1	2	6.05	6.34	6.51	2.643	6.195	26.43	633	0.234393
LACM	25178	LACM25178	Crotalus tigris	Crotalus_tigris_LACM_25178	66.5	7	1	6.02	5.25	5.86	2.725	5.635	27.25	665	0.206789
LACM	7304	LACM7304	Crotalus tigris	Crotalus_tigris_LACM_7304	46.9	6.6	1	5.57	5.99		2.39	5.78	23.9	469	0.241841
MVZ	229843	MVZ229843	Crotalus tigris	Crotalus_tigris_MVZ_229843	66.1	5	1	6.46	6.04	7.31	2.684	6.25	26.84	661	0.232861
MVZ	229844	MVZ229844	Crotalus tigris	Crotalus_tigris_MVZ_229844	59	4.3	2	6.6	5.8	7	2.429	6.2	24.29	590	0.255249
MVZ	229845	MVZ229845	Crotalus tigris	Crotalus_tigris_MVZ_229845	75.3	5.2	2	6.33	6.45	7.46	2.883	6.39	28.83	753	0.221644
MVZ	254458	MVZ254458	Crotalus tigris	Crotalus_tigris_MVZ_254458	70.9	6.9	1	6.13	6.4	6.81	2.774	6.265	27.74	709	0.225847
MVZ	277689	MVZ277689	Crotalus stephensi	Crotalus_tigris_MVZ_277689	78	4.5	2	7.14	6.76	8.02	3.261	6.95	32.61	780	0.213125
MVZ	50842	MVZ50842	Crotalus tigris	Crotalus_tigris_MVZ_50842	93.5	8.1	1	7.73	8.22	8.87	3.149	7.975	31.49	935	0.253255
MVZ	54622	MVZ54622	Crotalus tigris	Crotalus_tigris_MVZ_54622	69.5	5.3	1	5.61	6.44	6.39	2.715	6.025	27.15	695	0.221915
MVZ	70294	MVZ70294	Crotalus tigris	Crotalus_tigris_MVZ_70294	59.1	5.5	1	6.21	6.63	5.98	2.461	6.42	24.61	591	0.26087
MVZ	74281	MVZ74281	Crotalus tigris	Crotalus_tigris_MVZ_74281	68.1	5.1	1	5.16	6.43	8.73	2.82	5.795	28.2	681	0.205496
MVZ	74282	MVZ74282	Crotalus tigris	Crotalus_tigris_MVZ_74282	81	7.2	1	6.59	7.9	7.17	3.068	7.245	30.68	810	0.236147
MVZ	74699	MVZ74699	Crotalus tigris	Crotalus_tigris_MVZ_74699	75.6	6.2	1	5.88	6.54	5.31	2.868	6.21	28.68	756	0.216527
MVZ	79234	MVZ79234	Crotalus tigris	Crotalus_tigris_MVZ_79234	65.7	6.5	1	5.33	6.05	6.24	2.643	5.69	26.43	657	0.215286
MVZ	80177	MVZ80177	Crotalus tigris	Crotalus_tigris_MVZ_80177	69.3	6.3	1	7.67	6.84	6.06	2.643	7.255	26.43	693	0.274499
MVZ	81386	MVZ81386	Crotalus tigris	Crotalus_tigris_MVZ_81386	73.2	6.7	1	6.07	6.02	6.33	2.698	6.045	26.98	732	0.224055
UTA	7320		Crotalus tigris	Crotalus_tigris_UTA_7320	63.3	4.2	2	7.89	8.61	6.33	2.831	8.25	28.31	633	0.291416
CAS	14028	CAS14028	Crotalus atrox	Crotalus_tortugensis_CAS_14028	86	7	1	9.97	10.48	9.64	3.85	10.225	38.5	860	0.265584
CAS	51321	CAS51321	Crotalus atrox	Crotalus_tortugensis_CAS_51321	92	8	1	11.13		9.77	4.155	11.13	41.55	920	0.26787
CAS	51322	CAS51322	Crotalus atrox	Crotalus_tortugensis_CAS_51322	67	5.6	1	8.99	9.13	6.75	3.076	9.06	30.76	670	0.294538
CAS	51335	CAS51335	Crotalus atrox	Crotalus_tortugensis_CAS_51335	73.7	5.8	1	8.65	8.89	7.66	3.157	8.77	31.57	737	0.277795
MVZ	96806	MVZ96806	Crotalus atrox	Crotalus_tortugensis_MVZ_96806	92	6.8	1	10.45	10.67	6.47	3.851	10.56	38.51	920	0.274214
MVZ	96808	MVZ96808	Crotalus atrox	Crotalus_tortugensis_MVZ_96808	89.2	5	2	8.95	9.22	6.78	3.626	9.085	36.26	892	0.250552
MVZ	96809	MVZ96809	Crotalus atrox	Crotalus_tortugensis_MVZ_96809	84	94.8	2	8.81	8.91	7.6	3.499	8.86	34.99	840	0.253215
MVZ	96810	MVZ96810	Crotalus atrox	Crotalus_tortugensis_MVZ_96810	84.6	5.4	1	9.08	9.7	6.97	3.323	9.39	33.23	846	0.282576
ASU	17594	ASU17594	Crotalus totonacus	Crotalus_totonacus_ASU_17594	96.2	9	1	14.16	14.02	11.17	4.47	14.09	44.7	962	0.315213
UTA	7222	UTA7222	Crotalus totonacus	Crotalus_totonacus_UTA_7222	102.5	9	1	16.21	15.8	8.64	5.097	16.005	50.97	1025	0.314008
UTA	7223	UTA7223	Crotalus totonacus	Crotalus_totonacus_UTA_7223	133	9	1	20.13	19.84	11.63	5.761	19.985	57.61	1330	0.346902
UTA	7224	UTA7224	Crotalus totonacus	Crotalus_totonacus_UTA_7224	109.6	8.2	1	15.93	14.94	9.46	5.107	15.435	51.07	1096	0.302232
UTA	44467	UTA44467	Crotalus transversus	Crotalus_transversus_UTA_44467	13.1	1.4	1	1.51	1.83	2.76	1.181	1.67	11.81	131	0.141406
CAS	5276	CAS5276	Crotalus aquilus	Crotalus_triseriatus_aquilus_CAS_5276	46.6	4	1	4.59	4.58	4.98	2.522	4.585	25.22	466	0.1818
CAS	5846	CAS5846	Crotalus aquilus	Crotalus_triseriatus_aquilus_CAS_5846	39.2	2.6	2	4.42	4.59	5.65	2.303	4.505	23.03	392	0.195614
MVZ	105116	MVZ105116	Crotalus triseriatus	Crotalus_triseriatus_MVZ_105116	47.5	4.7	1		3.82	5.14	2.59	3.82	25.9	475	0.14749
MVZ	36745	MVZ36745	Crotalus triseriatus	Crotalus_triseriatus_MVZ_36745	42.5	4.7	1	4.95	4.84	6.5	2.338	4.895	23.38	425	0.209367
CAS	103588	CAS103588	Crotalus triseriatus	Crotalus_triseriatus_triseriatus_CAS_103588	32.5	3.3	1	3.99	4.29	4.1	2.113	4.14	21.13	325	0.19593
CAS	135352	CAS135352	Crotalus triseriatus	Crotalus_triseriatus_triseriatus_CAS_135352	31.5	3	1	4.43	3.46	4.43	2.079	3.945	20.79	315	0.189755
CAS	87175	CAS87175	Crotalus triseriatus	Crotalus_triseriatus_triseriatus_CAS_87175	39.3	3.7	1	4.56	4.4	4.9	2.427	4.48	24.27	393	0.18459
CAS	98554	CAS98554	Crotalus triseriatus	Crotalus_triseriatus_triseriatus_CAS_98554	32.6	3.3	1	3.81	4.07	5.18	1.933	3.94	19.33	326	0.203828
UTA	12600	UTA12600	Crotalus triseriatus	Crotalus_triseriatus_UTA_12600	36.2	5	1	5.38	5.24	4.83	2.267	5.31	22.67	362	0.23423
UTA	12601	UTA12601	Crotalus triseriatus	Crotalus_triseriatus_UTA_12601	48.5	5.9	1	6.99	6.8	5.54	2.81	6.895	28.1	485	0.245374
UTA	14517	UTA14517	Crotalus triseriatus	Crotalus_triseriatus_UTA_14517	36.4	2.9	2	6.2	5.36	5.03	2.19	5.78	21.9	364	0.263927
UTA	14518	UTA14518	Crotalus triseriatus	Crotalus_triseriatus_UTA_14518	31.9	2.9	2	5.02	4.71	4.3	2.124	4.865	21.24	319	0.229049
UTA	14519	UTA14519	Crotalus triseriatus	Crotalus_triseriatus_UTA_14519	36.2	4.7	1	6.02	5.94	4.61	2.39	5.98	23.9	362	0.250209
UTA	6732	UTA6732	Crotalus tzabcan	Crotalus_tzabcan_UTA_6732	83.3	8.8	1	13.89	13.04	10.62	4.338	13.465	43.38	833	0.310396
UTA	6802	UTA6802	Crotalus tzabcan	Crotalus_tzabcan_UTA_6802	84.5	8.7	1	13.01	12.52	8.88	4.216	12.765	42.16	845	0.302775
UTA	12673	UTA12673	Crotalus durissus	Crotalus_unicolor_UTA_12673	86.2	10.1	1	11.07	12.14	10.32	4.216	11.605	42.16	862	0.275261
UTA	7322	UTA7322	Crotalus durissus	Crotalus_unicolor_UTA_7322	72.4	8.3	1	11.66	11.66	10.38	4.13	11.66	41.3	724	0.282324
UTA	8199	UTA8199	Crotalus durissus	Crotalus_unicolor_UTA_8199	72.6	9.4	1	12.46	12.13	10.49	3.933	12.295	39.33	726	0.312611
UTA	8225	UTA8225	Crotalus durissus	Crotalus_unicolor_UTA_8225	75.8	9	1	8.48	9.77	8.86	3.745	9.125	37.45	758	0.243658
UTA	9631	UTA9631	Crotalus durissus	Crotalus_unicolor_UTA_9631	65.4	8.5	1	11.5	10.49	7.93	3.4	10.995	34	654	0.323382
UTA	9632	UTA9632	Crotalus durissus	Crotalus_unicolor_UTA_9632	67.8	5.4	2	11.22	10.52	8.26	3.58	10.87	35.8	678	0.303631
UTA	9633	UTA9633	Crotalus durissus	Crotalus_unicolor_UTA_9633	72.4	9.2	1	12.24	11.68	8.5	3.673	11.96	36.73	724	0.325619
CAS	63906	CAS63906	Crotalus oreganus	Crotalus_viridis_abyssus_CAS_63906	73.6	4.9	1	7.48	7.51	8.35	2.534	7.495	25.34	736	0.295777
CAS	13584	CAS13584	Crotalus oreganus	Crotalus_viridis_calignis_CAS_13584	43.4	2.5	2	5.13	4.48	5.31	1.816	4.805	18.16	434	0.264593
CAS	13585	CAS13585	Crotalus oreganus	Crotalus_viridis_calignis_CAS_13585	48.5	3.3	2	6.2	5.78	6.3	2.264	5.99	22.64	485	0.264576
CAS	13586	CAS13586	Crotalus oreganus	Crotalus_viridis_calignis_CAS_13586	52.6	3.8	1	6	6.7	6.36	2.246	6.35	22.46	526	0.282725
CAS	13587	CAS13587	Crotalus oreganus	Crotalus_viridis_calignis_CAS_13587	54.5	4.9	1	8	8.24	5.75	2.574	8.12	25.74	545	0.315462
CAS	192809	CAS192809	Crotalus viridis	Crotalus_viridis_CAS_192809	55.7	5.2	1	6.13		5.29	2.208	6.13	22.08	557	0.277627
CAS	204070	CAS204070	Crotalus viridis	Crotalus_viridis_CAS_204070	64.1	5.1	1	6.81	6.04	7.87	2.573	6.425	25.73	641	0.249709
CAS	229227	CAS229227	Crotalus viridis	Crotalus_viridis_CAS_229227	65.6	5.7	1	6.67	6.02	7.18	2.337	6.345	23.37	656	0.271502
CAS	17539	CAS17539	Crotalus cerberus	Crotalus_viridis_cerberus_CAS_17539	82	6.5	1	8.5	8.52	8.98	2.979	8.51	29.79	820	0.285666
CAS	34683	CAS34683	Crotalus cerberus	Crotalus_viridis_cerberus_CAS_34683	89.3	7	1	11.36		12.29	3.29	11.36	32.9	893	0.345289
CAS	148648	CAS148648	Crotalus oreganus	Crotalus_viridis_concolor_CAS_148648	51.4	4.5	1	4.71	4.98	6.09	1.944	4.845	19.44	514	0.249228
CAS	170409	CAS170409	Crotalus oreganus	Crotalus_viridis_concolor_CAS_170409	47.2	4.2	1	5.29	5.67	6.15	2.167	5.48	21.67	472	0.252884
CAS	170410	CAS170410	Crotalus oreganus	Crotalus_viridis_concolor_CAS_170410	51.3	3.5	2	6.14	6.68	6.2	2.273	6.41	22.73	513	0.282006
CAS	170411	CAS170411	Crotalus oreganus	Crotalus_viridis_concolor_CAS_170411	54.2	3	2	5.06	5.84	5.89	2.126	5.45	21.26	542	0.25635
CAS	229242	CAS229242	Crotalus oreganus	Crotalus_viridis_concolor_CAS_229242	63.8	4.9	1	6.7		7.74	2.329	6.7	23.29	638	0.287677
CAS	38098	CAS38098	Crotalus oreganus	Crotalus_viridis_concolor_CAS_38098	61.4	4.6	1	6.98	6.18	7.29	2.262	6.58	22.62	614	0.290893
CAS	40960	CAS40960	Crotalus oreganus	Crotalus_viridis_concolor_CAS_40960	51.3	3.2	1	5.06	5.27	5.48	1.848	5.165	18.48	513	0.279491
CAS	103050	CAS103050	Crotalus oreganus	Crotalus_viridis_decolor_CAS_103050	64.7	5.3	1	6.95	6.08	7.2	2.274	6.515	22.74	647	0.2865
CAS	182516	CAS182516	Crotalus oreganus	Crotalus_viridis_helleri_CAS_182516	76.8	6.6	1	9.21		9.81	2.986	9.21	29.86	768	0.308439
CAS	182518	CAS182518	Crotalus oreganus	Crotalus_viridis_helleri_CAS_182518	87.3	4.6	2	9.39	9.4	9.65	3.327	9.395	33.27	873	0.282387
CAS	182522	CAS182522	Crotalus oreganus	Crotalus_viridis_helleri_CAS_182522	76.3	4.4	1	8.42	8.55	9.6	3.071	8.485	30.71	763	0.276294
CAS	182524	CAS182524	Crotalus oreganus	Crotalus_viridis_helleri_CAS_182524	105.5	8.3	1	11.97	10.19	13	4.023	11.08	40.23	1055	0.275416
CAS	182528	CAS182528	Crotalus oreganus	Crotalus_viridis_helleri_CAS_182528	71.6	5.8	1	9.13	9.37	10.08	3.092	9.25	30.92	716	0.299159
CAS	182530	CAS182530	Crotalus oreganus	Crotalus_viridis_helleri_CAS_182530	71.5	5.2	1	7.04	7.78	8.63	3.007	7.41	30.07	715	0.246425
CAS	228052	CAS228052	Crotalus oreganus	Crotalus_viridis_helleri_CAS_228052	64.3	4.5	2	8.64	8.67	7.58	2.779	8.655	27.79	643	0.311443
CAS	259882	CAS259882	Crotalus oreganus	Crotalus_viridis_helleri_CAS_259882	89.5	7.4	1	9.2	9.91	10.2	4.371	9.555	43.71	895	0.2186
CAS	259886	CAS259886	Crotalus oreganus	Crotalus_viridis_helleri_CAS_259886	67.4	5.3	1	7.89	9.08	8.3	3.137	8.485	31.37	674	0.270481
CAS	27277	CAS27277	Crotalus oreganus	Crotalus_viridis_helleri_CAS_27277	66.1	5.7	1	7.99		7.76	2.351	7.99	23.51	661	0.339855
CAS	56883	CAS56883	Crotalus oreganus	Crotalus_viridis_helleri_CAS_56883	87	6.9	1	9.57	9.71	8.37	3.534	9.64	35.34	870	0.272779
CAS	57555	CAS57555	Crotalus oreganus	Crotalus_viridis_helleri_CAS_57555	77.4	6.9	1	9.09	8.93	8.25	3.124	9.01	31.24	774	0.288412
LACM	105112	LACM105112	Crotalus viridis	Crotalus_viridis_LACM_105112	58.7	4.8	1	6.59	6.08	7.23	3.036	6.335	30.36	587	0.208663
LACM	105189	LACM105189	Crotalus viridis	Crotalus_viridis_LACM_105189	66.3	5.5	1	7.75	7.99	7.76	3.481	7.87	34.81	663	0.226084
LACM	105190	LACM105190	Crotalus viridis	Crotalus_viridis_LACM_105190	72.6	5.7	1	9.52	9.24	9.22	3.736	9.38	37.36	726	0.251071
LACM	3119	LACM3119	Crotalus viridis	Crotalus_viridis_LACM_3119	74.5	5	1	9.3	8.4	8.9	3.745	8.85	37.45	745	0.236315
LACM	3120	LACM3120	Crotalus oreganus	Crotalus_viridis_LACM_3120	91	6.7	1	10.68	10.82	10.78	4.336	10.75	43.36	910	0.247924
CAS	125419	CAS125419	Crotalus oreganus	Crotalus_viridis_lutosus_CAS_125419	73	4.6	1	7.73	7.46	7.94	2.528	7.595	25.28	730	0.300435
CAS	14367	CAS14367	Crotalus oreganus	Crotalus_viridis_lutosus_CAS_14367	72.2	5.3	1	8.06		8.25	2.731	8.06	27.31	722	0.29513
CAS	1662	CAS1662	Crotalus oreganus	Crotalus_viridis_lutosus_CAS_1662	57.4	4.7	1	5.59	6.34	6.81	2.352	5.965	23.52	574	0.253614
CAS	195041	CAS195041	Crotalus oreganus	Crotalus_viridis_lutosus_CAS_195041	61.8	5.3	1		6.56	6.91	2.379	6.56	23.79	618	0.275746
CAS	19916	CAS19916	Crotalus oreganus	Crotalus_viridis_lutosus_CAS_19916	97	7	1	8.48	8.81	9.95	3.219	8.645	32.19	970	0.268562
CAS	201282	CAS201282	Crotalus oreganus	Crotalus_viridis_lutosus_CAS_201282	69.5	5.4	1	7.04	7.74	6.6	2.751	7.39	27.51	695	0.26863
CAS	202955	CAS202955	Crotalus oreganus	Crotalus_viridis_lutosus_CAS_202955	83.3	6.4	1	8.1	8.3	10.51	2.894	8.2	28.94	833	0.283345
CAS	202965	CAS202965	Crotalus oreganus	Crotalus_viridis_lutosus_CAS_202965	69	5.4	1	8.23	7.94	7.13	2.584	8.085	25.84	690	0.312887
CAS	202966	CAS202966	Crotalus oreganus	Crotalus_viridis_lutosus_CAS_202966	69	5	1	6.23	7.65	6.04	2.605	6.94	26.05	690	0.266411
CAS	202967	CAS202967	Crotalus oreganus	Crotalus_viridis_lutosus_CAS_202967	71.2	6	1	7.28	7.22	6.17	2.634	7.25	26.34	712	0.275247
CAS	202974	CAS202974	Crotalus oreganus	Crotalus_viridis_lutosus_CAS_202974	81.2	6.3	1	9.61	9.27	10.77	3.193	9.44	31.93	812	0.295647
CAS	202979	CAS202979	Crotalus oreganus	Crotalus_viridis_lutosus_CAS_202979	64.6	5	1	7.23	7.44	8.38	2.264	7.335	22.64	646	0.323984
CAS	21619	CAS21619	Crotalus oreganus	Crotalus_viridis_lutosus_CAS_21619	80.3	8	1	9.86	9.2	10.24	2.924	9.53	29.24	803	0.325923
CAS	21620	CAS21620	Crotalus oreganus	Crotalus_viridis_lutosus_CAS_21620	93.7	7	1	9.34	9.44	9.24	3.439	9.39	34.39	937	0.273044
CAS	21622	CAS21622	Crotalus oreganus	Crotalus_viridis_lutosus_CAS_21622	64.7	5	1	7.65	7.68	8.15	2.669	7.665	26.69	647	0.287186
CAS	21623	CAS21623	Crotalus oreganus	Crotalus_viridis_lutosus_CAS_21623	61	3.8	2	7.8	7.76	8.84	2.361	7.78	23.61	610	0.329521
CAS	21624	CAS21624	Crotalus oreganus	Crotalus_viridis_lutosus_CAS_21624	60.8	3.7	1		7.88	8.73	2.248	7.88	22.48	608	0.350534
CAS	21625	CAS21625	Crotalus oreganus	Crotalus_viridis_lutosus_CAS_21625	66.7	6.1	1	8.08	8.11	9.07	2.744	8.095	27.44	667	0.295007
CAS	21628	CAS21628	Crotalus oreganus	Crotalus_viridis_lutosus_CAS_21628	64.5	3.3	2	7.37	8.22	7.96	2.489	7.795	24.89	645	0.313178
CAS	21629	CAS21629	Crotalus oreganus	Crotalus_viridis_lutosus_CAS_21629	58.2	4.7	1	7.82	7.3	6.85	2.346	7.56	23.46	582	0.322251
CAS	21630	CAS21630	Crotalus oreganus	Crotalus_viridis_lutosus_CAS_21630	59	4.9	1	7.02	6.78	7.39	2.354	6.9	23.54	590	0.293118
CAS	21631	CAS21631	Crotalus oreganus	Crotalus_viridis_lutosus_CAS_21631	68.2	5.1	1	8.24	8.44	7.89	2.649	8.34	26.49	682	0.314836
CAS	21632	CAS21632	Crotalus oreganus	Crotalus_viridis_lutosus_CAS_21632	60.2	4.2	2	6.86		6.47	2.325	6.86	23.25	602	0.295054
CAS	21633	CAS21633	Crotalus oreganus	Crotalus_viridis_lutosus_CAS_21633	65.4	5.1	1		7.56	7.79	2.618	7.56	26.18	654	0.28877
CAS	21635	CAS21635	Crotalus oreganus	Crotalus_viridis_lutosus_CAS_21635	62.5	4	2	7.37	8.02	8.16	2.381	7.695	23.81	625	0.323184
CAS	21636	CAS21636	Crotalus oreganus	Crotalus_viridis_lutosus_CAS_21636	64.2	5.3	1	7.56	8.01	8.53	2.514	7.785	25.14	642	0.309666
CAS	21637	CAS21637	Crotalus oreganus	Crotalus_viridis_lutosus_CAS_21637	62	4.3	1	5.86	6.67	8.05	2.59	6.265	25.9	620	0.241892
CAS	21638	CAS21638	Crotalus oreganus	Crotalus_viridis_lutosus_CAS_21638	55.4	3.7	2	7.55	6.51	7.31	2.243	7.03	22.43	554	0.31342
CAS	21639	CAS21639	Crotalus oreganus	Crotalus_viridis_lutosus_CAS_21639	59.7	3.5	2	6.98		7.83	2.049	6.98	20.49	597	0.340654
CAS	21642	CAS21642	Crotalus oreganus	Crotalus_viridis_lutosus_CAS_21642	74	5.3	1	8.17	7.04	9.32	2.614	7.605	26.14	740	0.290933
CAS	21643	CAS21643	Crotalus oreganus	Crotalus_viridis_lutosus_CAS_21643	54.5	4.2	1	6.03	6.75	8.35	2.22	6.39	22.2	545	0.287838
CAS	21645	CAS21645	Crotalus oreganus	Crotalus_viridis_lutosus_CAS_21645	63.5	5	1	7.34	8.08	8.98	2.488	7.71	24.88	635	0.309887
CAS	21646	CAS21646	Crotalus oreganus	Crotalus_viridis_lutosus_CAS_21646	63	3.8	2	7.44	6.9	6.79	2.286	7.17	22.86	630	0.313648
CAS	21661	CAS21661	Crotalus oreganus	Crotalus_viridis_lutosus_CAS_21661	78.5	6	1	8.92	8.93	8.95	2.927	8.925	29.27	785	0.30492
CAS	227921	CAS227921	Crotalus oreganus	Crotalus_viridis_lutosus_CAS_227921	69.3	5.4	1	7.4		8.36	2.347	7.4	23.47	693	0.315296
CAS	227957	CAS227957	Crotalus oreganus	Crotalus_viridis_lutosus_CAS_227957	62.5	4.7	1	7.6	8.29	7.45	2.574	7.945	25.74	625	0.308664
CAS	249494	CAS249494	Crotalus oreganus	Crotalus_viridis_lutosus_CAS_249494	71.5	6	1	8.28	8.75	9.01	3.4	8.515	34	715	0.250441
CAS	249495	CAS249495	Crotalus oreganus	Crotalus_viridis_lutosus_CAS_249495	87.6	7.2	1	8.6	8.06	9.99	3.904	8.33	39.04	876	0.213371
CAS	27196	CAS27196	Crotalus oreganus	Crotalus_viridis_lutosus_CAS_27196	82.7	6.8	1	9.05	9.46	8.85	2.984	9.255	29.84	827	0.310154
CAS	30922	CAS30922	Crotalus oreganus	Crotalus_viridis_lutosus_CAS_30922	66	6	1		7.41	9.12	2.659	7.41	26.59	660	0.278676
CAS	38439	CAS38439	Crotalus oreganus	Crotalus_viridis_lutosus_CAS_38439	73.2	5.4	1	6.72	7.18	5.91	2.605	6.95	26.05	732	0.266795
CAS	44220	CAS44220	Crotalus oreganus	Crotalus_viridis_lutosus_CAS_44220	60.8	5.2	1	8.28		6.56	2.419	8.28	24.19	608	0.34229
CAS	44221	CAS44221	Crotalus oreganus	Crotalus_viridis_lutosus_CAS_44221	62.8	4.8	1	6.78	6.13	6.63	2.28	6.455	22.8	628	0.283114
CAS	47751	CAS47751	Crotalus oreganus	Crotalus_viridis_lutosus_CAS_47751	78.2	5	1	8.15	7.93	8.1	2.889	8.04	28.89	782	0.278297
CAS	47752	CAS47752	Crotalus oreganus	Crotalus_viridis_lutosus_CAS_47752	104.2	7.6	1	10.8	10.76	10.49	3.523	10.78	35.23	1042	0.305989
CAS	54011	CAS54011	Crotalus oreganus	Crotalus_viridis_lutosus_CAS_54011	58.2	4	2	6.48	7.17	6.74	2.33	6.825	23.3	582	0.292918
CAS	54017	CAS54017	Crotalus oreganus	Crotalus_viridis_lutosus_CAS_54017	83.8	6.9	1		7.5	8.8	3.02	7.5	30.2	838	0.248344
CAS	55223	CAS55223	Crotalus oreganus	Crotalus_viridis_lutosus_CAS_55223	69.2	4.2	2	7.29	6.85	8.5	2.629	7.07	26.29	692	0.268924
CAS	55225	CAS55225	Crotalus oreganus	Crotalus_viridis_lutosus_CAS_55225	58.8	3.8	1	6.44	6.41	6.36	2.293	6.425	22.93	588	0.280201
CAS	55226	CAS55226	Crotalus oreganus	Crotalus_viridis_lutosus_CAS_55226	59.3	3.3	2	5.32	5.68	6.3	2.159	5.5	21.59	593	0.254748
CAS	55227	CAS55227	Crotalus oreganus	Crotalus_viridis_lutosus_CAS_55227	77	4.8	2	7.05	7.84	7.39	2.713	7.445	27.13	770	0.274419
CAS	55233	CAS55233	Crotalus oreganus	Crotalus_viridis_lutosus_CAS_55233	101	7	1	9.72	9.02	9.26	3.34	9.37	33.4	1010	0.280539
CAS	63908	CAS63908	Crotalus oreganus	Crotalus_viridis_lutosus_CAS_63908	68.4	4.1	2	7.47	6.95	8.15	2.471	7.21	24.71	684	0.291785
CAS	63909	CAS63909	Crotalus oreganus	Crotalus_viridis_lutosus_CAS_63909	68.3	4.1	2	6.27	6.36	7.3	2.395	6.315	23.95	683	0.263674
CAS	64120	CAS64120	Crotalus oreganus	Crotalus_viridis_lutosus_CAS_64120	64.5	4	1	7.25	7.65	6.29	2.373	7.45	23.73	645	0.313949
CAS	64121	CAS64121	Crotalus oreganus	Crotalus_viridis_lutosus_CAS_64121	64.4	4.2	2	7.61	7.98	7.35	2.577	7.795	25.77	644	0.302484
CAS	64122	CAS64122	Crotalus oreganus	Crotalus_viridis_lutosus_CAS_64122	59	4.5	1	6.96	7.18	7.22	2.303	7.07	23.03	590	0.306991
CAS	64191	CAS64191	Crotalus oreganus	Crotalus_viridis_lutosus_CAS_64191	80.8	5.6	1	8.03	8.39	9.36	2.867	8.21	28.67	808	0.286362
CAS	64192	CAS64192	Crotalus oreganus	Crotalus_viridis_lutosus_CAS_64192	86.2	6.3	1	8.71	9.67	10.8	3.1	9.19	31	862	0.296452
CAS	64193	CAS64193	Crotalus oreganus	Crotalus_viridis_lutosus_CAS_64193	64.7	5.4	1	7.11	7.45	6.88	2.385	7.28	23.85	647	0.305241
CAS	64194	CAS64194	Crotalus oreganus	Crotalus_viridis_lutosus_CAS_64194	88.6	6.7	1	9.09	8.39	9.33	3.139	8.74	31.39	886	0.278433
CAS	64209	CAS64209	Crotalus oreganus	Crotalus_viridis_lutosus_CAS_64209	82	6.2	1	8.98	8.07	7.83	2.712	8.525	27.12	820	0.314344
CAS	64210	CAS64210	Crotalus oreganus	Crotalus_viridis_lutosus_CAS_64210	72	4	2	7.66	7.55	7.48	2.635	7.605	26.35	720	0.288615
CAS	6542	CAS6542	Crotalus oreganus	Crotalus_viridis_lutosus_CAS_6542	92.3	7	1	9.87	10.27	10.56	3.114	10.07	31.14	923	0.323378
CAS	85699	CAS85699	Crotalus oreganus	Crotalus_viridis_lutosus_CAS_85699	59.3	5.2	1	7.15	7.05	8.15	2.497	7.1	24.97	593	0.284341
CAS	91624	CAS91624	Crotalus oreganus	Crotalus_viridis_lutosus_CAS_91624	82	6.5	1	8.27	8.29	10.11	3.082	8.28	30.82	820	0.268657
CAS	92263	CAS92263	Crotalus oreganus	Crotalus_viridis_lutosus_CAS_92263	85	6.5	1	9.66	10.18	8.81	3.047	9.92	30.47	850	0.325566
CAS	93787	CAS93787	Crotalus oreganus	Crotalus_viridis_lutosus_CAS_93787	64.6	3.9	2	6.51	6.81	8.6	2.451	6.66	24.51	646	0.271726
CAS	93788	CAS93788	Crotalus oreganus	Crotalus_viridis_lutosus_CAS_93788	81.1	6.4	1	9.91	9.79	10.84	2.853	9.85	28.53	811	0.345251
CAS	93792	CAS93792	Crotalus oreganus	Crotalus_viridis_lutosus_CAS_93792	84	6.4	1	8.12	8.1	10.61	2.955	8.11	29.55	840	0.27445
CAS	98551	CAS98551	Crotalus oreganus	Crotalus_viridis_lutosus_CAS_98551	69	4.9	1	8.61	8.13	7.32	2.664	8.37	26.64	690	0.314189
CAS	209200	CAS209200	Crotalus oreganus	Crotalus_viridis_oreganus_CAS_209200	96.6	7.8	1	11.2	11.44	11.2	3.821	11.32	38.21	966	0.296258
CAS	212985	CAS212985	Crotalus oreganus	Crotalus_viridis_oreganus_CAS_212985	71.3	5.5	1	8.55	9.06	8.27	2.838	8.805	28.38	713	0.310254
CAS	219609	CAS219609	Crotalus oreganus	Crotalus_viridis_oreganus_CAS_219609	58.4			6.73	6.38	7.39	2.415	6.555	24.15	584	0.271429
CAS	223732	CAS223732	Crotalus oreganus	Crotalus_viridis_oreganus_CAS_223732	64.7	6.1	1	7.42	7.56	6.84	2.747	7.49	27.47	647	0.272661
CAS	224199	CAS224199	Crotalus oreganus	Crotalus_viridis_oreganus_CAS_224199	60.5	4.8	1	7.06	6.28	7.15	2.409	6.67	24.09	605	0.276878
CAS	224764	CAS224764	Crotalus oreganus	Crotalus_viridis_oreganus_CAS_224764	95	7.1	1		10.85	11.89	3.46	10.85	34.6	950	0.313584
CAS	228214	CAS228214	Crotalus oreganus	Crotalus_viridis_oreganus_CAS_228214	61	4.3	1	7.36	6.43	6.26	2.619	6.895	26.19	610	0.263268
CAS	252894	CAS252894	Crotalus oreganus	Crotalus_viridis_oreganus_CAS_252894	80.1	5.2	1	9.1	9.08	9.56	3.796	9.09	37.96	801	0.239463
CAS	252896	CAS252896	Crotalus oreganus	Crotalus_viridis_oreganus_CAS_252896	62.3	4.3	1	7.23	7.63	8.12	3.163	7.43	31.63	623	0.234904
CAS	252903	CAS252903	Crotalus oreganus	Crotalus_viridis_oreganus_CAS_252903	68.7	5.2	1	7.09	7.36	7.87	3.427	7.225	34.27	687	0.210826
CAS	259877	CAS259877	Crotalus oreganus	Crotalus_viridis_oreganus_CAS_259877	73.3	4.3	2	7.01			3.481	7.01	34.81	733	0.201379
CAS	259878	CAS259878	Crotalus oreganus	Crotalus_viridis_oreganus_CAS_259878	64	4.7	2	7.81	8.4	8.45	3.152	8.105	31.52	640	0.257138
CAS	259899	CAS259899	Crotalus oreganus	Crotalus_viridis_oreganus_CAS_259899	57.7	5.5	1	7.72	8.44	7.81	3.084	8.08	30.84	577	0.261997
CAS	259900	CAS259900	Crotalus oreganus	Crotalus_viridis_oreganus_CAS_259900	60.7	4	2	7.69	7.04	6.08	3.413	7.365	34.13	607	0.215793
CAS	78687	CAS78687	Crotalus oreganus	Crotalus_viridis_oreganus_CAS_78687	73.5	4.2	1	7.1	6.81	8.34	2.716	6.955	27.16	735	0.256075
MVZ	5404	MVZ5404	Crotalus oreganus	Crotalus_viridis_oreganus_MVZ_5404	58.2	3.3	2	7.32	8.21	7.62	2.941	7.765	29.41	582	0.264026
CAS	100842	CAS100842	Crotalus viridis	Crotalus_viridis_viridis_CAS_100842	71.1	5.1	1	8.06	8.69	8.04	2.626	8.375	26.26	711	0.318926
CAS	100843	CAS100843	Crotalus viridis	Crotalus_viridis_viridis_CAS_100843	77.5	6.5	1	9.89	10.13	7.84	2.927	10.01	29.27	775	0.341988
CAS	102312	CAS102312	Crotalus viridis	Crotalus_viridis_viridis_CAS_102312	57	4.4	1	8.09	8.08	6.58	2.393	8.085	23.93	570	0.33786
CAS	102313	CAS102313	Crotalus viridis	Crotalus_viridis_viridis_CAS_102313	69.1	6.2	1	8.82	9.36	7.19	2.789	9.09	27.89	691	0.325923
CAS	10419	CAS10419	Crotalus viridis	Crotalus_viridis_viridis_CAS_10419	66.3	5	1		7.76	8.49	2.5	7.76	25	663	0.3104
CAS	10422	CAS10422	Crotalus viridis	Crotalus_viridis_viridis_CAS_10422	80.5	5	2		9.39	10.17	2.853	9.39	28.53	805	0.329127
CAS	14361	CAS14361	Crotalus viridis	Crotalus_viridis_viridis_CAS_14361	76.9	6.7	1	10.82	9.82	9.28	3.367	10.32	33.67	769	0.306504
CAS	62649	CAS62649	Crotalus viridis	Crotalus_viridis_viridis_CAS_62649	87.5	5.1	1	9.55	10	8.26	3.106	9.775	31.06	875	0.314713
CAS	6415	CAS6415	Crotalus viridis	Crotalus_viridis_viridis_CAS_6415	68.8	4.7	1	8.38	7.87	8.18	2.715	8.125	27.15	688	0.299263
CAS	93794	CAS93794	Crotalus viridis	Crotalus_viridis_viridis_CAS_93794	87	5.3	2	10.92	10.97	10.2	3.333	10.945	33.33	870	0.328383
CAS	93795	CAS93795	Crotalus viridis	Crotalus_viridis_viridis_CAS_93795	73.5	5.6	1	10.28	11.09	7.91	2.933	10.685	29.33	735	0.364303
CAS	93796	CAS93796	Crotalus viridis	Crotalus_viridis_viridis_CAS_93796	76.3	4.7	1	9.17	8.9	6.74	2.99	9.035	29.9	763	0.302174
CAS	93797	CAS93797	Crotalus viridis	Crotalus_viridis_viridis_CAS_93797	81.7	5.2	1	8.37	8.7	8.56	2.881	8.535	28.81	817	0.296251
CAS	93799	CAS93799	Crotalus viridis	Crotalus_viridis_viridis_CAS_93799	80.6	4.7	2	8.22	9.02	7.16	3.039	8.62	30.39	806	0.283646
CAS	93800	CAS93800	Crotalus viridis	Crotalus_viridis_viridis_CAS_93800	94	8.3	1	11.08	10.5	8.2	3.382	10.79	33.82	940	0.319042
CAS	93801	CAS93801	Crotalus viridis	Crotalus_viridis_viridis_CAS_93801	67.1	5.3	1	9.51	8.34	6.71	2.7	8.925	27	671	0.330556
CAS	93802	CAS93802	Crotalus viridis	Crotalus_viridis_viridis_CAS_93802	91	7.7	1	9.4	9.67	9.09	3.383	9.535	33.83	910	0.28185
CAS	9781	CAS9781	Crotalus viridis	Crotalus_viridis_viridis_CAS_9781	69.9	4.3	2	8.78	8.89	8.5	2.687	8.835	26.87	699	0.328805
CAS	9782	CAS9782	Crotalus viridis	Crotalus_viridis_viridis_CAS_9782	66.2	6.2	1	8.18	9.08	7.2	2.648	8.63	26.48	662	0.325906
MVZ	68894	MVZ68894	Crotalus willardi	Crotalus_willardi_amabilis_MVZ_68894	46.7	5.8	1	6.65	6.6	4.69	2.767	6.625	27.67	467	0.239429
MVZ	68895	MVZ68895	Crotalus willardi	Crotalus_willardi_amabilis_MVZ_68895	51.5	6.3	1	6.79	7.12	5.78	2.845	6.955	28.45	515	0.244464
MVZ	68896	MVZ68896	Crotalus willardi	Crotalus_willardi_amabilis_MVZ_68896	51.4	6.5	1	7.44	6.8	8.12	3.298	7.12	32.98	514	0.215888
MVZ	68897	MVZ68897	Crotalus willardi	Crotalus_willardi_amabilis_MVZ_68897	41.7	4.2	2	6.16	6.31	6.38	2.531	6.235	25.31	417	0.246345
MVZ	68898	MVZ68898	Crotalus willardi	Crotalus_willardi_amabilis_MVZ_68898	44.4	6	1	6.6	6.98	5.38	2.768	6.79	27.68	444	0.245303
MVZ	68899	MVZ68899	Crotalus willardi	Crotalus_willardi_amabilis_MVZ_68899	45.4	6	1	5.23	5.95	5.73	2.798	5.59	27.98	454	0.199786
MVZ	68900	MVZ68900	Crotalus willardi	Crotalus_willardi_amabilis_MVZ_68900	49.8	5.9	1	7.64	8.16	6.27	2.84	7.9	28.4	498	0.278169
MVZ	71015	MVZ71015	Crotalus willardi	Crotalus_willardi_amabilis_MVZ_71015	34.7	3.2	2	4.13	5	3.89	2.264	4.565	22.64	347	0.201634
MVZ	71016	MVZ71016	Crotalus willardi	Crotalus_willardi_amabilis_MVZ_71016	48.1	5.7	1	6.47	5.75	6.12	2.794	6.11	27.94	481	0.218683
UTA	17848	UTA17848	Crotalus willardi	Crotalus_willardi_amabilis_UTA_17848	42.9	3.8	2	7.04	6.58	5.57	2.657	6.81	26.57	429	0.256304
UTA	22526	UTA22526	Crotalus willardi	Crotalus_willardi_amabilis_UTA_22526	51.2	6.4	1	6.47	6.9	5.49	2.865	6.685	28.65	512	0.233333
UTA	32081	UTA32081	Crotalus willardi	Crotalus_willardi_amabilis_UTA_32081	50.1	6.6	1	7.69	7.12	5.82	3.01	7.405	30.1	501	0.246013
UTA	8688	UTA8688	Crotalus willardi	Crotalus_willardi_amabilis_UTA_8688	46	5	1	6.63	6.12	5.32	2.83	6.375	28.3	460	0.225265
LACM	135249	LACM135249	Crotalus willardi	Crotalus_willardi_LACM_135249	45.5	6.8	1	6.94	6.37	4.81	2.76	6.655	27.6	455	0.241123
UTA	9356	UTA9356	Crotalus willardi	Crotalus_willardi_meridionalis_UTA_9356	48.1	7.3	1	7.39	7.32	7.02	2.993	7.355	29.93	481	0.24574
MVZ	229970	MVZ229970	Crotalus willardi	Crotalus_willardi_MVZ_229970	52.3	6.3	1	6.09	6	5.22	2.703	6.045	27.03	523	0.22364
MVZ	229971	MVZ229971	Crotalus willardi	Crotalus_willardi_MVZ_229971	51.5	6.3	1	6.14	6.72	5.87	2.82	6.43	28.2	515	0.228014
MVZ	230546	MVZ230546	Crotalus willardi	Crotalus_willardi_MVZ_230546	56.1	5	1	6.18	5.97	5.41	2.847	6.075	28.47	561	0.213383
MVZ	73092	MVZ73092	Crotalus willardi	Crotalus_willardi_MVZ_73092	49.9	5.3	1	5.93	6.72	6.19	2.823	6.325	28.23	499	0.224052
MVZ	73093	MVZ73093	Crotalus willardi	Crotalus_willardi_MVZ_73093	50.6	55	1	6.82	6.4	5.97	2.81	6.61	28.1	506	0.235231
LACM	178762	LACM178762	Crotalus willardi	Crotalus_willardi_silus_LACM_178762	38.6	4.6	1	5.23	4.74	5.77	2.407	4.985	24.07	386	0.207104
MVZ	46692	MVZ46692	Crotalus willardi	Crotalus_willardi_silus_MVZ_46692	53.7	6.3	1	6.5	5.66	7.51	2.946	6.08	29.46	537	0.206382
MVZ	46693	MVZ46693	Crotalus willardi	Crotalus_willardi_silus_MVZ_46693	32.9	3.8	1	5.78	5.24	4.98	2.052	5.51	20.52	329	0.268519
MVZ	46694	MVZ46694	Crotalus willardi	Crotalus_willardi_silus_MVZ_46694	61.5	6.9	1	6.76		6.06	3.195	6.76	31.95	615	0.211581
UTA	17849	UTA17849	Crotalus willardi	Crotalus_willardi_UTA_17849	50.9	6.5	1	6.69	6.59	7.64	2.692	6.64	26.92	509	0.246657
UTA	17850	UTA17850	Crotalus willardi	Crotalus_willardi_UTA_17850	44	4.6	1	6.4	6.26	6.21	2.569	6.33	25.69	440	0.246399
UTA	17851	UTA17851	Crotalus willardi	Crotalus_willardi_UTA_17851	37.3	4.2	1	5.54	4.93	5.36	2.332	5.235	23.32	373	0.224485
UTA	17852	UTA17852	Crotalus willardi	Crotalus_willardi_UTA_17852	46.6	5.6	1	6.19	6.6	7.26	2.897	6.395	28.97	466	0.220746
UTA	17853	UTA17853	Crotalus willardi	Crotalus_willardi_UTA_17853	45.8	4.9	2	6.6	6.28	5.42	2.638	6.44	26.38	458	0.244124
UTA	17854	UTA17854	Crotalus willardi	Crotalus_willardi_UTA_17854	39.5	4.4	1	6.06	5.45	5.73	2.449	5.755	24.49	395	0.234994
UTA	17903	UTA17903	Crotalus willardi	Crotalus_willardi_UTA_17903	39.9	4.6	1	5.6	5.33	4.82	2.207	5.465	22.07	399	0.247621
UTA	18361	UTA18361	Crotalus willardi	Crotalus_willardi_UTA_18361	49.7	5.6	1	7.6	7.15	5.79	3.045	7.375	30.45	497	0.2422
UTA	6942	UTA6942	Crotalus willardi	Crotalus_willardi_UTA_6942	55.3	7	1	6.33	6.59	7.23	2.923	6.46	29.23	553	0.221006
CAS	48038	CAS48038	Crotalus willardi	Crotalus_willardi_willardi_CAS_48038	48.6	5.6	1	6.62	7.37	6.95	2.891	6.995	28.91	486	0.241958
CAS	48041	CAS48041	Crotalus willardi	Crotalus_willardi_willardi_CAS_48041	43.4	3.9	2	5.98	6.17	4.66	2.813	6.075	28.13	434	0.215962
LACM	178763	LACM178763	Crotalus willardi	Crotalus_willardi_willardi_LACM_178763	49	4.4	1	6.14	6.85	5.69	2.755	6.495	27.55	490	0.235753
LACM	178764	LACM178764	Crotalus willardi	Crotalus_willardi_willardi_LACM_178764	44.4	4	2	5.16	5.15	4.85	2.829	5.155	28.29	444	0.18222
LACM	178765	LACM178765	Crotalus willardi	Crotalus_willardi_willardi_LACM_178765	52	5	2	5.66	6.06	5.97	2.754	5.86	27.54	520	0.212781
UTA	17856	UTA17856	Crotalus willardi	Crotalus_willardi_willardi_UTA_17856	48.5	5.6	1	6.7	6.52	7.06	2.759	6.61	27.59	485	0.23958
UTA	17857	UTA17857	Crotalus willardi	Crotalus_willardi_willardi_UTA_17857	46	4.3	2	6.63	6.66	6.62	2.649	6.645	26.49	460	0.250849
UTA	31062	UTA31062	Crotalus willardi	Crotalus_willardi_willardi_UTA_31062	57	5.5	2	7.67	6.97	5.74	3.103	7.32	31.03	570	0.235901
MVZ	248468	MVZ248468	Daboia russelii	Daboia_russelii_MVZ_248468	122.8	21.7	1	13.5	12.82	10.53	5.634	13.16	56.34	1228	0.233582
CAS	213576	CAS213576	Daboia siamensis	Daboia_russelli_CAS_213576	75.7	9.6	1	10.42	11.36	7.25	3.929	10.89	39.29	757	0.27717
MVZ	23891	MVZ23891	Deinagkistrodon acutus	Deinagkistrodon_acutus_MVZ_23891	55.1	9.8	1	8.66	8.47	8.41	3.962	8.565	39.62	551	0.216179
MVZ	243549	MVZ243549	Echis carinatus	Echis_carinatus_MVZ_243549	42.7	3.8	2	5.62	5.82	4.34	2.359	5.72	23.59	427	0.242476
MVZ	243609	MVZ243609	Echis carinatus	Echis_carinatus_MVZ_243609	65.5	6.3	1	7.1	7.36	5.19	2.977	7.23	29.77	655	0.242862
MVZ	246024	MVZ246024	Echis carinatus	Echis_carinatus_MVZ_246024	53	3	2	4.86	4.9	5.35	2.43	4.88	24.3	530	0.200823
UTA	8217	UTA8217	Echis coloratus	Echis_coloratus_UTA_8217	49.1	8.3	1	7.75	7.48	5.18	2.632	7.615	26.32	491	0.289324
CAS	179737	CAS179737	Echis carinatus	Echis_multisquamatus_CAS_179737	53	6	1	6.18	6.37	6.58	2.665	6.275	26.65	530	0.23546
CAS	179740	CAS179740	Echis carinatus	Echis_multisquamatus_CAS_179740	50.3	5.3	1	5.61	5.71	5.78	2.503	5.66	25.03	503	0.226129
MVZ	176470	MVZ176470	Echis ocellatus	Echis_ocellatus_MVZ_176470	44	3.9	2	5.56	6.25	4.94	2.237	5.905	22.37	440	0.26397
MVZ	229493	MVZ229493	Echis ocellatus	Echis_ocellatus_MVZ_229493	50	5.5	1	6.75	7.1	6.21	2.634	6.925	26.34	500	0.262908
CAS	261511	CAS261511	Echis pyramidum	Echis_pyramidum_CAS_261511	59.5	5.9	2	9.82	9.61	4.76	2.986	9.715	29.86	595	0.325352
CAS	262619	CAS262619	Echis pyramidum	Echis_pyramidum_CAS_262619	56.4	6.5	1	8.19	8.28	4.12	2.95	8.235	29.5	564	0.279153
CAS	120504	CAS120504	Eristicophis macmahoni	Eristicophis_macmahoni_CAS_120504	30.1	3.3	2	4.6	5.31	5.7	2.157	4.955	21.57	301	0.229717
CAS	99901	CAS99901	Eristicophis macmahoni	Eristicophis_macmahoni_CAS_99901	61.8	6.2	1	7.68	8.2	9.15	3.552	7.94	35.52	618	0.223536
MVZ	22312	MVZ22312	Gloydius blomhoffii	Gloydius_blomhoffi_MVZ_22312	55.8	5	1	7.06	6.59	7.47	3.201	6.825	32.01	558	0.213215
MVZ	22313	MVZ22313	Gloydius blomhoffii	Gloydius_blomhoffi_MVZ_22313	45.8	5.1	2	6.03	5.73	5.37	2.602	5.88	26.02	458	0.22598
MVZ	22315	MVZ22315	Gloydius blomhoffii	Gloydius_blomhoffi_MVZ_22315	46.5	5.8	1	5.97	6.39	5.41	2.519	6.18	25.19	465	0.245335
MVZ	22320	MVZ22320	Gloydius blomhoffii	Gloydius_blomhoffi_MVZ_22320	50.2	5.2	1	6.11	6.29	5.93	2.829	6.2	28.29	502	0.219159
MVZ	22322	MVZ22322	Gloydius blomhoffii	Gloydius_blomhoffi_MVZ_22322	43.8	6.1	1	5.16		4.71	2.608	5.16	26.08	438	0.197853
CAS	87049	CAS87049	Gloydius ussuriensis	Gloydius_caliginosus_CAS_87049	40.6	6.8	2	4.74	4.72	5.06	2.265	4.73	22.65	406	0.20883
CAS	87052	CAS87052	Gloydius ussuriensis	Gloydius_caliginosus_CAS_87052	40.3	6.9	1	5.38	5.28	5.27	2.423	5.33	24.23	403	0.219975
CAS	183387	CAS183387	Gloydius halys	Gloydius_halys_CAS_183387	56.5	8	1	6.02	5.88	7.02	2.869	5.95	28.69	565	0.207389
CAS	179743	CAS179743	Gloydius halys	Gloydius_halys_caucasicus_CAS_179743	46.6	5.9	1	4.64	5.12	6.07	2.528	4.88	25.28	466	0.193038
CAS	12461	CAS12461	Gloydius himalayanus	Gloydius_himalayanus_CAS_12461	47	9.5	1	5.04		4.7	2.624	5.04	26.24	470	0.192073
MVZ	211753	MVZ211753	Gloydius intermedius	Gloydius_intermedius_MVZ_211753	41.5	5.5	1	3.2	2.51	3.91	1.817	2.855	18.17	415	0.157127
CAS	31528	CAS31528	Gloydius intermedius	Gloydius_intermedius_saxatilis_CAS_31528	62.2	9.2	1	9.52	9.1	8.76	3.394	9.31	33.94	622	0.274308
MVZ	216678	MVZ216678	Gloydius strauchi	Gloydius_strauchi_MVZ_216678	47.6	7.5	1	3.5	3.25	5.82	2.276	3.375	22.76	476	0.148286
MVZ	216680	MVZ216680	Gloydius strauchi	Gloydius_strauchi_MVZ_216680	45.8	7.6	1	3.47	3.86	5.38	2.35	3.665	23.5	458	0.155957
MVZ	216825	MVZ216825	Gloydius strauchi	Gloydius_strauchi_MVZ_216825	44.9	6.5	1	4.02	3.81	3.91	2.242	3.915	22.42	449	0.174621
MVZ	216826	MVZ216826	Gloydius strauchi	Gloydius_strauchi_MVZ_216826	43	5.6	1	3.25	3.68	4.97	1.975	3.465	19.75	430	0.175443
MVZ	216829	MVZ216829	Gloydius strauchi	Gloydius_strauchi_MVZ_216829	38.2	7.3	1	3.73	3.96	4.8	2.062	3.845	20.62	382	0.186469
MVZ	176819	MVZ176819	Gloydius ussuriensis	Gloydius_ussuriensis_MVZ_176819	45	7.2	1	4.93	5.02	5.23	2.8	4.975	28	450	0.177679
MVZ	61831	MVZ61831	Gloydius ussuriensis	Gloydius_ussuriensis_MVZ_61831	50.2	7.3	1	4.71	4.52	6.08	2.676	4.615	26.76	502	0.172459
MVZ	66683	MVZ66683	Gloydius ussuriensis	Gloydius_ussuriensis_MVZ_66683	49.3	6.9	1	4.33	4.72	4.29	2.501	4.525	25.01	493	0.180928
UTA	7536	UTA7536	Hypnale hypnale	Hypnale_hypnale_UTA_7536	48.9		2	9.68	10.05	5.68	3.28	9.865	32.8	489	0.300762
UTA	51453	UTA51453	Lachesis acrochorda	Lachesis_acrochordata_UTA_51453				22.19	26.51	18.01	8.732	24.35	87.32		0.278859
UTA	7234	UTA7234	Lachesis acrochorda	Lachesis_acrochordata_UTA_7234	56.9	6.6	1	13.57	14.27	7.88	3.942	13.92	39.42	569	0.35312
LACM	154666	LACM154666	Lachesis melanocephala	Lachesis_melanocephala_LACM_154666	108.5	11	1	16.95	17.86	12.53	5.577	17.405	55.77	1085	0.312085
MVZ	229858	MVZ229858	Lachesis melanocephala	Lachesis_melanocephala_MVZ_229858	187	16.5	1	26.14	22.19	14.02	7.52	24.165	75.2	1870	0.321343
CAS	257759	CAS257759	Lachesis muta	Lachesis_muta_CAS_257759	131	14.3	1	19.64	19.78	13.79	5.121	19.71	51.21	1310	0.384886
LACM	154667	LACM154667	Lachesis stenophrys	Lachesis_muta_LACM_154667	57.3	6.5	1	12.29		10.53	3.82	12.29	38.2	573	0.321728
UTA	17132	UTA17132	Lachesis muta	Lachesis_muta_muta_UTA_17132	148.4	16.7	1	22.82	20.51	13.67	6.336	21.665	63.36	1484	0.341935
MVZ	163367	MVZ163367	Lachesis muta	Lachesis_muta_MVZ_163367	253	22	1	25.98	29.18	20.96	8.332	27.58	83.32	2530	0.331013
MVZ	163368	MVZ163368	Lachesis muta	Lachesis_muta_MVZ_163368	157	15.2	1	21.2	20.33	12.12	6.476	20.765	64.76	1570	0.320645
MVZ	163369	MVZ163369	Lachesis muta	Lachesis_muta_MVZ_163369	242.3	23	1	24.68	26.83	18.47	8.145	25.755	81.45	2423	0.316206
MVZ	163370	MVZ163370	Lachesis muta	Lachesis_muta_MVZ_163370	83.3	8.1	1	15.31	13.97	6.63	4.672	14.64	46.72	833	0.313356
MVZ	163371	MVZ163371	Lachesis muta	Lachesis_muta_MVZ_163371	131	13.3	2	19.98	19.75	14.19	6.097	19.865	60.97	1310	0.325816
MVZ	176551	MVZ176551	Lachesis muta	Lachesis_muta_MVZ_176551	220	18	1	28.72	22.5	12.47	8.36	25.61	83.6	2200	0.30634
MVZ	176552	MVZ176552	Lachesis muta	Lachesis_muta_MVZ_176552	64.6	6.5	1	10.24	9.54	5.94	3.545	9.89	35.45	646	0.278984
MVZ	229859	MVZ229859	Lachesis stenophrys	Lachesis_muta_MVZ_229859	127.2	13.1	1	22.28	21.63	14.83	6.298	21.955	62.98	1272	0.348603
MVZ	229860	MVZ229860	Lachesis stenophrys	Lachesis_muta_MVZ_229860				25.8	28.36	20.62	8.81	27.08	88.1		0.307378
UTA	12945	UTA12945	Lachesis stenophrys	Lachesis_stenophrys_UTA_12945	130.1	16.3	2	21.81	22.94	11.96	6.671	22.375	66.71	1301	0.335407
UTA	15415	UTA15415	Lachesis stenophrys	Lachesis_stenophrys_UTA_15415	130.1	14.5	1	19	18.06	10.43	5.623	18.53	56.23	1301	0.329539
UTA	21973	UTA21973	Lachesis stenophrys	Lachesis_stenophrys_UTA_21973	102.5	11.1	1	18.68	18.34	7.54	4.758	18.51	47.58	1025	0.389029
UTA	6319	UTA6319	Lachesis stenophrys	Lachesis_stenophrys_UTA_6319	71.5	8.2	2	13.76	13.11	11.42	4.42	13.435	44.2	715	0.303959
UTA	8065	UTA8065	Lachesis stenophrys	Lachesis_stenophrys_UTA_8065	126.5	13.6	1	16.23	16.19	12.5	6.245	16.21	62.45	1265	0.259568
CAS	135274	CAS135274	Mixcoatlus browni	Mixcoatlus_browni_CAS_135274	31.3	4	1	3.1	3.52	4.68	1.913	3.31	19.13	313	0.173027
UTA	56264	UTA56264	Mixcoatlus browni	Mixcoatlus_browni_UTA_56264	20.9	2.7	2	2.84	3.03	3.88	1.544	2.935	15.44	209	0.190091
UTA	56265	UTA56265	Mixcoatlus browni	Mixcoatlus_browni_UTA_56265	21.7	2.9	1	3.05	2.77	3.35	1.544	2.91	15.44	217	0.188472
UTA	12554	UTA12554	Mixcoatlus melanurus	Mixcoatlus_melanurus_UTA_12554	36.1	5.1	2	5.03	4.92	4.61	2.228	4.975	22.28	361	0.223294
UTA	12557	UTA12557	Mixcoatlus melanurus	Mixcoatlus_melanurus_UTA_12557	29.6	4.6	1	3.67	3.78	5.17	1.913	3.725	19.13	296	0.19472
UTA	12558	UTA12558	Mixcoatlus melanurus	Mixcoatlus_melanurus_UTA_12558	47.5	6.3	2	6.54	6.27	6.46	2.763	6.405	27.63	475	0.231813
UTA	12559	UTA12559	Mixcoatlus melanurus	Mixcoatlus_melanurus_UTA_12559	40.6	6.3	1	4.94	4.86	5.78	2.377	4.9	23.77	406	0.206142
UTA	13032	UTA13032	Mixcoatlus melanurus	Mixcoatlus_melanurus_UTA_13032	50.9	6.6	1	6.28	6.03	7.09	2.843	6.155	28.43	509	0.216497
UTA	14496	UTA14496	Mixcoatlus melanurus	Mixcoatlus_melanurus_UTA_14496	41.3	5.5	2	5.46	5.56	4.33	2.388	5.51	23.88	413	0.230737
UTA	22451	UTA22451	Mixcoatlus melanurus	Mixcoatlus_melanurus_UTA_22451	35.6	5.7	1	4.3	4.89	4.31	2.149	4.595	21.49	356	0.21382
UTA	22453	UTA22453	Mixcoatlus melanurus	Mixcoatlus_melanurus_UTA_22453	35.6	5.4	1	4.82	4.59	5.07	2.403	4.705	24.03	356	0.195797
UTA	34146	UTA34146	Mixcoatlus melanurus	Mixcoatlus_melanurus_UTA_34146	47.7	6.3	2	5.37	6.04	5.38	2.754	5.705	27.54	477	0.207153
UTA	4910	UTA4910	Mixcoatlus melanurus	Mixcoatlus_melanurus_UTA_4910	31.2	4.2	1	4.38	3.91	3.85	1.965	4.145	19.65	312	0.210941
UTA	51098	UTA51098	Mixcoatlus melanurus	Mixcoatlus_melanurus_UTA_51098	53.8	8	1	5.59	6.31	5.85	2.896	5.95	28.96	538	0.205456
UTA	5815	UTA5815	Mixcoatlus melanurus	Mixcoatlus_melanurus_UTA_5815	41.3	5.4	1	5.32	5.34	6.13	2.421	5.33	24.21	413	0.220157
UTA	6817	UTA6817	Mixcoatlus melanurus	Mixcoatlus_melanurus_UTA_6817	36.5	6.2	1	4.27	4.35	4.52	2.406	4.31	24.06	365	0.179135
UTA	9611	UTA9611	Mixcoatlus melanurus	Mixcoatlus_melanurus_UTA_9611	49.5	6.5	2	6.66	6.34	6.74	2.905	6.5	29.05	495	0.223752
UTA	51734	UTA51734	Ophryacus smaragdinus	Ophryacus_smaragdinus_UTA_51734	48.3	6.8	1	5.1	5.54	5.42	2.578	5.32	25.78	483	0.206362
UTA	51735	UTA51735	Ophryacus smaragdinus	Ophryacus_smaragdinus_UTA_51735	37.8	5.8	1	4.44	4.23	5.45	2.058	4.335	20.58	378	0.210641
UIMNH	6262	UIMNH62623	Ophryacus undulatus	Ophryacus_undulalatus_UIMNH_6262	37	5.5		3.07	4.66	4.45	2.162	3.865	21.62	370	0.17877
CAS	169618	CAS169618	Ophryacus undulatus	Ophryacus_undulatus_CAS_169618	52.3	7.3	1	7.57	7.76	7.22	2.951	7.665	29.51	523	0.259742
UTA	18026	UTA18026	Ophryacus undulatus	Ophryacus_undulatus_UTA_18026	46.6	6.7	1		5.97	4.47	2.431	5.97	24.31	466	0.245578
UTA	18422	UTA18422	Ophryacus undulatus	Ophryacus_undulatus_UTA_18422	54.2	7.8	1	7.85	7.5	6.27	2.922	7.675	29.22	542	0.262663
UTA	24749	UTA24749	Ophryacus undulatus	Ophryacus_undulatus_UTA_24749	57.3	7.5	2	8.75	8.72	6.45	2.921	8.735	29.21	573	0.299041
UTA	24750	UTA24750	Ophryacus undulatus	Ophryacus_undulatus_UTA_24750	59.4	9	2	8.83	8.67	6.01	2.938	8.75	29.38	594	0.297822
UTA	25115	UTA25115	Ophryacus undulatus	Ophryacus_undulatus_UTA_25115	62.6	9.2	1	9.9	9.8	7.57	3.396	9.85	33.96	626	0.290047
UTA	4108	UTA4108	Ophryacus undulatus	Ophryacus_undulatus_UTA_4108	53	8.1	1	7.84	8.06	5.58	2.921	7.95	29.21	530	0.272167
UTA	4517	UTA4517	Ophryacus undulatus	Ophryacus_undulatus_UTA_4517	53.5	8.1	2	8.24	7.62	6.18	3.009	7.93	30.09	535	0.263543
UTA	4518	UTA4518	Ophryacus undulatus	Ophryacus_undulatus_UTA_4518	55.9	9.6	1	8.74	8.09	6.31	2.921	8.415	29.21	559	0.288086
UTA	4639	UTA4639	Ophryacus undulatus	Ophryacus_undulatus_UTA_4639	57.6	7.7	2	11.34	10.83	6.69	3.126	11.085	31.26	576	0.354607
UTA	4640	UTA4640	Ophryacus undulatus	Ophryacus_undulatus_UTA_4640	59.7	10.3	1	8.13	8.49	6.44	2.948	8.31	29.48	597	0.281886
UTA	4642	UTA4642	Ophryacus undulatus	Ophryacus_undulatus_UTA_4642	56.6	9	1	8.05	7.51	6.67	2.859	7.78	28.59	566	0.272123
UTA	4832	UTA4832	Ophryacus undulatus	Ophryacus_undulatus_UTA_4832	55.1	8.6	1	8.28	8.27	6.92	2.949	8.275	29.49	551	0.280604
UTA	4834	UTA4834	Ophryacus undulatus	Ophryacus_undulatus_UTA_4834	58.8	8.6	1	9.06	9.14	5.65	3.277	9.1	32.77	588	0.277693
UTA	4835	UTA4835	Ophryacus undulatus	Ophryacus_undulatus_UTA_4835	54.5	8.4	1	9.03	9.29	5.48	2.956	9.16	29.56	545	0.309878
UTA	4914	UTA4914	Ophryacus undulatus	Ophryacus_undulatus_UTA_4914	55.5	7.7	1	9.57	9.19	7.29	3.062	9.38	30.62	555	0.306336
UTA	6652	UTA6652	Ophryacus undulatus	Ophryacus_undulatus_UTA_6652	46.6	6.4	1	7.81	7.26	5.46	2.684	7.535	26.84	466	0.280738
UTA	9861	UTA9861	Ophryacus undulatus	Ophryacus_undulatus_UTA_9861	56.4	10	1	7.52	7.44	6.54	2.886	7.48	28.86	564	0.259182
CAS	242032	CAS242032	Ovophis monticola	Ovophis_monticola_CAS_242032	82.2	15.1	1	9.46	9.04	10.62	4.199	9.25	41.99	822	0.220291
MVZ	226627	MVZ226627	Ovophis monticola	Ovophis_monticola_MVZ_226627	69	10.7	1	7.31		8.23	3.659	7.31	36.59	690	0.199781
CAS	117755	CAS117755	Ovophis okinavensis	Ovophis_okinavensis_CAS_117755	52	9.5	1	7.85	7.5	9.77	3.792	7.675	37.92	520	0.2024
MVZ	200851	MVZ200851	Ovophis okinavensis	Ovophis_okinavensis_MVZ_200851	59.2	11	1	8.95	7.55	10.61	4.231	8.25	42.31	592	0.194989
UTA	62259	UTA62259	Trimeresurus hageni	Parias_hageni_UTA_62259	87.8	16.2	1	15.31	16.05	8.07	4.432	15.68	44.32	878	0.353791
UTA	63061	UTA63061	Trimeresurus andalasensis	Popeia_andalasensis_UTA_63061	36.6	7.2	1	4.79	4.56	4.33	2.203	4.675	22.03	366	0.212211
UTA	63073	UTA63073	Trimeresurus sabahi	Popeia_sabahi_UTA_63073	50.5	15.4	1	7.06	7.33	7.33	3.035	7.195	30.35	505	0.237068
UTA	55938	UTA55938	Porthidium arcosae	Porthidium_arcosae_UTA_55938	39.4	4.4	2	6.57	6.91	4.82	2.608	6.74	26.08	394	0.258436
CAS	169559	CAS169559	Porthidium dunni	Porthidium_dunni_CAS_169559	37.2	5.1	1	5.43	5.53	4.49	2.369	5.48	23.69	372	0.231321
CAS	73647	CAS73647	Porthidium dunni	Porthidium_dunni_CAS_73647	38	4.8	2	5.88		4.72	2.136	5.88	21.36	380	0.275281
LACM	114150	LACM114150	Porthidium dunni	Porthidium_dunni_LACM_114150	34	4.7	1	4.64	4.86	4.21	2.123	4.75	21.23	340	0.22374
LACM	9515	LACM9515	Porthidium dunni	Porthidium_dunni_LACM_9515	27.5	4.3	1	3.91	3.98	3.86	1.751	3.945	17.51	275	0.2253
UIMNH	27849	UIMNH27849	Porthidium dunni	Porthidium_dunni_UIMNH_27849	37.5	4.6	1	5.67	6.03	5.95	2.291	5.85	22.91	375	0.255347
UIMNH	27850	UIMNH27850	Porthidium dunni	Porthidium_dunni_UIMNH_27850	29.2	3.4	1	5.05	5.74	4.27	1.821	5.395	18.21	292	0.296266
UIMNH	27858	UIMNH27858	Porthidium dunni	Porthidium_dunni_UIMNH_27858	24.1	3.4	0	3.67	4.29	4.21	1.595	3.98	15.95	241	0.24953
UIMNH	27859	UIMNH27859	Porthidium dunni	Porthidium_dunni_UIMNH_27859	44.1	5.5	1	5.65	6.11	5.11	2.404	5.88	24.04	441	0.244592
UIMNH	27861	UIMNH27861	Porthidium dunni	Porthidium_dunni_UIMNH_27861	33.3	4.6	1	4.83	5.2	3.71	1.825	5.015	18.25	333	0.274795
UIMNH	27862	UIMNH27862	Porthidium dunni	Porthidium_dunni_UIMNH_27862	38	5.2	1	5.25	5.97	3.97	2.131	5.61	21.31	380	0.263257
UIMNH	27863	UIMNH27863	Porthidium dunni	Porthidium_dunni_UIMNH_27863	40.5	5.5	1	6.14	6.42	6.13	2.33	6.28	23.3	405	0.269528
UIMNH	27864	UIMNH27864	Porthidium dunni	Porthidium_dunni_UIMNH_27864	29.9	3.7	1	4.02	4.7	4.37	1.753	4.36	17.53	299	0.248716
UIMNH	27866	UIMNH27866	Porthidium dunni	Porthidium_dunni_UIMNH_27866	34.8	5.3	1	3.73	5.12	4.4	2.079	4.425	20.79	348	0.212843
UIMNH	27867	UIMNH27867	Porthidium dunni	Porthidium_dunni_UIMNH_27867	37.5	5	1	5.46	6.3	5.46	2.162	5.88	21.62	375	0.27197
UIMNH	27870	UIMNH27870	Porthidium dunni	Porthidium_dunni_UIMNH_27870	28.6	3.9	1	4.23	4.77	4.24	1.802	4.5	18.02	286	0.249723
UIMNH	27875	UIMNH27875	Porthidium dunni	Porthidium_dunni_UIMNH_27875	31	4.2	1	4.7	5.56	2.83	1.901	5.13	19.01	310	0.269858
UIMNH	27876	UIMNH27876	Porthidium dunni	Porthidium_dunni_UIMNH_27876	36.2	5.5	1	6.03	5.17	4.85	2.197	5.6	21.97	362	0.254893
UIMNH	27879	UIMNH27879	Porthidium dunni	Porthidium_dunni_UIMNH_27879	34.3	5.1	1	5.01	5.46	5.05	1.957	5.235	19.57	343	0.267501
UIMNH	27880	UIMNH27880	Porthidium dunni	Porthidium_dunni_UIMNH_27880	34.3	5	1	5.87	5.09	4.43	1.869	5.48	18.69	343	0.293205
UIMNH	28028	UIMNH28028	Porthidium dunni	Porthidium_dunni_UIMNH_28028	33.4	4.6	1	5.27	5.21	4.73	1.982	5.24	19.82	334	0.264379
UIMNH	28030	UIMNH28030	Porthidium dunni	Porthidium_dunni_UIMNH_28030	31.7	5.8	1	4.88	4.89	3.88	1.994	4.885	19.94	317	0.244985
UIMNH	35634	UIMNH35634	Porthidium dunni	Porthidium_dunni_UIMNH_35634	36.8	5.1	1	6.48	6.21	5.67	2.18	6.345	21.8	368	0.291055
UIMNH	35891	UIMNH35891	Porthidium dunni	Porthidium_dunni_UIMNH_35891	37.2	6.5	1	5.36	5.85	4.79	2.062	5.605	20.62	372	0.271823
UIMNH	35896	UIMNH35896	Porthidium dunni	Porthidium_dunni_UIMNH_35896	30.1	4	1	4.55	4.62	4.89	1.803	4.585	18.03	301	0.254298
UIMNH	52966	UIMNH52966	Porthidium dunni	Porthidium_dunni_UIMNH_52966	33	5.6	1	5.28	5.08	3.32	2.016	5.18	20.16	330	0.256944
UIMNH	6243	UIMNH6243	Porthidium dunni	Porthidium_dunni_UIMNH_6243	30.1	4.6	1	4.06	5.33	4.31	1.948	4.695	19.48	301	0.241016
UTA	4443	UTA4443	Porthidium hespere	Porthidium_hespere_UTA_4443	49	6.9	2	9.36	9.9	4.59	2.957	9.63	29.57	490	0.325668
CAS	116158	CAS116158	Porthidium lansbergii	Porthidium_lansbergi_CAS_116158	30.5	3.8	2	4.31	5.23	3.27	2.12	4.77	21.2	305	0.225
CAS	116159	CAS116159	Porthidium lansbergii	Porthidium_lansbergi_CAS_116159	29.4	4	1	4.44	3.84	4.35	1.824	4.14	18.24	294	0.226974
CAS	116160	CAS116160	Porthidium lansbergii	Porthidium_lansbergi_CAS_116160	38.2	4.1	1	7.55	7.27	5.3	2.551	7.41	25.51	382	0.290474
CAS	116210	CAS116210	Porthidium lansbergii	Porthidium_lansbergi_CAS_116210	36.8	4.3	1	5.76	5.88	4.45	2.503	5.82	25.03	368	0.232521
CAS	21061	CAS21061	Porthidium lansbergii	Porthidium_lansbergi_CAS_21061	48	5.5	1	7.88	7.44	6.73	2.999	7.66	29.99	480	0.255418
LACM	51547	LACM51547	Porthidium lansbergii	Porthidium_lansbergi_LACM_51547	34.5	3.5	2	5.72	5.84	4.78	2.33	5.78	23.3	345	0.248069
MVZ	78766	MVZ78766	Porthidium lansbergii	Porthidium_lansbergii_MVZ_78766	35.4	4.3	1	5.21	5.3	6.26	2.284	5.255	22.84	354	0.230079
UTA	3677	UTA3677	Porthidium lansbergii	Porthidium_lansbergii_UTA_3677	36.8	5.2	1	6.16	6.1	4.17	2.342	6.13	23.42	368	0.261742
UTA	4993	UTA4993	Porthidium lansbergii	Porthidium_lansbergii_UTA_4993	31.6		1	6.73	6.03	5.1	2.351	6.38	23.51	316	0.271374
UTA	4994	UTA4994	Porthidium lansbergii	Porthidium_lansbergii_UTA_4994	39.8	6	1	6.81	6.91	3.91	2.5	6.86	25	398	0.2744
UTA	4995	UTA4995	Porthidium lansbergii	Porthidium_lansbergii_UTA_4995	54	6.6	2	11.34	11.59	6.28	3.658	11.465	36.58	540	0.313423
UTA	9707	UTA9707	Porthidium lansbergii	Porthidium_lansbergii_UTA_9707	37.6	4	2	7.25	7.97	4.5	2.71	7.61	27.1	376	0.280812
CAS	119919	CAS119919	Porthidium nasutum	Porthidium_nasutum_CAS_119919	34.9	5	1	4.1	5.08	3.91	2.423	4.59	24.23	349	0.189435
LACM	114153	LACM114153	Porthidium nasutum	Porthidium_nasutum_LACM_114153	52.3	5.4	2	10.76	11.22	7.97	4.006	10.99	40.06	523	0.274338
LACM	154608	LACM154608	Porthidium nasutum	Porthidium_nasutum_LACM_154608	43.4	4.1	2	8.7	8.68	5.82	3.249	8.69	32.49	434	0.267467
LACM	154610	LACM154610	Porthidium nasutum	Porthidium_nasutum_LACM_154610	50.8	4.8	2	10.47	10.44	7.73	4.335	10.455	43.35	508	0.241176
LACM	154611	LACM154611	Porthidium nasutum	Porthidium_nasutum_LACM_154611	37.2	4	2	7.34	8.26	4.6	3.124	7.8	31.24	372	0.24968
LACM	154616	LACM154616	Porthidium nasutum	Porthidium_nasutum_LACM_154616	37.1	5	1	6.21	6.36	5.74	2.611	6.285	26.11	371	0.240712
LACM	154617	LACM154617	Porthidium nasutum	Porthidium_nasutum_LACM_154617	28.7	3	2	6.53	6.05	4.13	2.427	6.29	24.27	287	0.259168
LACM	154618	LACM154618	Porthidium nasutum	Porthidium_nasutum_LACM_154618	39.4	4	1	7.98	7.23	4.93	2.742	7.605	27.42	394	0.277352
LACM	154628	LACM154628	Porthidium nasutum	Porthidium_nasutum_LACM_154628	27.2	2.8	2	4.31	4.55	4.82	2.162	4.43	21.62	272	0.204903
LACM	154629	LACM154629	Porthidium nasutum	Porthidium_nasutum_LACM_154629	30.1	4.2	1	5.06	5.73	4.58	2.328	5.395	23.28	301	0.231744
LACM	45415	LACM45415	Porthidium nasutum	Porthidium_nasutum_LACM_45415	24	2.7	2	4.82	4.18	4.7	1.984	4.5	19.84	240	0.226815
LACM	45416	LACM45416	Porthidium nasutum	Porthidium_nasutum_LACM_45416	44.3	5.1	2	10.41	9.88	6.71	3.449	10.145	34.49	443	0.294143
MVZ	217608	MVZ217608	Porthidium nasutum	Porthidium_nasutum_MVZ_217608	34	4.3	1	5.88	6.06	4.64	2.449	5.97	24.49	340	0.243773
MVZ	269981	MVZ269981	Porthidium nasutum	Porthidium_nasutum_MVZ_269981	51.2	4.5	2	9.76	10.27	6.52	3.368	10.015	33.68	512	0.297357
MVZ	83442	MVZ83442	Porthidium nasutum	Porthidium_nasutum_MVZ_83442	27.2	33.5	1	4.18	4.32	4.61	1.71	4.25	17.1	272	0.248538
LACM	114155	LACM114155	Porthidium ophryomegas	Porthidium_ophryomegas_LACM_114155	31.5	5	1	4.96	4.9	4.2	2.072	4.93	20.72	315	0.237934
LACM	114157	LACM114157	Porthidium ophryomegas	Porthidium_ophryomegas_LACM_114157	47.2	7.6	1	7.51	6.94	4.84	2.648	7.225	26.48	472	0.272847
LACM	114158	LACM114158	Porthidium ophryomegas	Porthidium_ophryomegas_LACM_114158	51.5	8.4	1	8.68	8.97	5.2	2.582	8.825	25.82	515	0.341789
LACM	154640	LACM154640	Porthidium ophryomegas	Porthidium_ophryomegas_LACM_154640	62.5	8.9	2	11.61	11.36	6.97	3.892	11.485	38.92	625	0.295092
LACM	154641	LACM154641	Porthidium ophryomegas	Porthidium_ophryomegas_LACM_154641	55.5	7.3	1	8.62	8.95	6.18	3.33	8.785	33.3	555	0.263814
LACM	154643	LACM154643	Porthidium ophryomegas	Porthidium_ophryomegas_LACM_154643	38	4.8	2	5.56	6.39	4.58	2.349	5.975	23.49	380	0.254364
LACM	154644	LACM154644	Porthidium ophryomegas	Porthidium_ophryomegas_LACM_154644	42.8	6.1	1	7.46	6.63	4.6	2.569	7.045	25.69	428	0.274231
LACM	154646	LACM154646	Porthidium ophryomegas	Porthidium_ophryomegas_LACM_154646	37.5	4.5	2	5.95	5.87	4.39	2.424	5.91	24.24	375	0.243812
LACM	154647	LACM154647	Porthidium ophryomegas	Porthidium_ophryomegas_LACM_154647	45	5.6	2	7.52	7.69	4.62	2.793	7.605	27.93	450	0.272288
LACM	154648	LACM154648	Porthidium ophryomegas	Porthidium_ophryomegas_LACM_154648	42	7	1	7.59	7.17	5.51	2.387	7.38	23.87	420	0.309175
LACM	154649	LACM154649	Porthidium ophryomegas	Porthidium_ophryomegas_LACM_154649	36.3	6.2	1	5.18	5.76	4.38	2.257	5.47	22.57	363	0.242357
LACM	154650	LACM154650	Porthidium ophryomegas	Porthidium_ophryomegas_LACM_154650	33.5	4.9	1	5.09	5.33	4.36	1.965	5.21	19.65	335	0.26514
LACM	154652	LACM154652	Porthidium ophryomegas	Porthidium_ophryomegas_LACM_154652	30	3.8	1	5.52	5.4	4.55	2.179	5.46	21.79	300	0.250574
LACM	154653	LACM154653	Porthidium ophryomegas	Porthidium_ophryomegas_LACM_154653	36.5	6	1	5.06	5.52	4.49	2.285	5.29	22.85	365	0.23151
LACM	28268	LACM28268	Porthidium ophryomegas	Porthidium_ophryomegas_LACM_28268	40	6	1	6.43	6.11	4.96	2.333	6.27	23.33	400	0.268753
UTA	24829	UTA24829	Porthidium volcanicum	Porthidium_porrasi_UTA_24829	44.6	5	2	8.09	8.36	4.44	2.747	8.225	27.47	446	0.299418
UTA	24830	UTA24830	Porthidium volcanicum	Porthidium_porrasi_UTA_24830	47.4	5.4	2	9.67	10.31	5.42	2.947	9.99	29.47	474	0.338989
UTA	30829	UTA30829	Porthidium porrasi	Porthidium_porrasi_UTA_30829	31.1	3.1	2	6.81	6.73	4.06	2.377	6.77	23.77	311	0.284813
UTA	30830	UTA30830	Porthidium porrasi	Porthidium_porrasi_UTA_30830	48.4	4.7	2	13.26	13.13	4.98	3.908	13.195	39.08	484	0.337641
UTA	52898	UTA52898	Porthidium porrasi	Porthidium_porrasi_UTA_52898	33	4	2	6.54		4.93	2.763	6.54	27.63	330	0.236699
UTA	16960	UTA16960	Porthidium yucatanicum	Porthidium_yucatanicum_UTA_16960	46.2	7.6	1	8.05	8.49	5.28	2.799	8.27	27.99	462	0.295463
MVZ	230071	MVZ230071	Proatheris superciliaris	Proatheris_supercilliaris_MVZ_230071	72.7	7.1	1	9.73	9.45	7.11	3.655	9.59	36.55	727	0.26238
CAS	215115	CAS215115	Protobothrops jerdonii	Protobothrops_jerdonii_CAS_215115	75.8	14.8	1	13.12	13.09	6.49	3.593	13.105	35.93	758	0.364737
CAS	234493	CAS234493	Protobothrops jerdonii	Protobothrops_jerdonii_CAS_234493	90.5	20	1	15.26	14.4	7.55	4.589	14.83	45.89	905	0.323164
CAS	242630	CAS242630	Protobothrops jerdonii	Protobothrops_jerdonii_CAS_242630	77.8	15.7	2	13.95	13.68	6.45	3.784	13.815	37.84	778	0.36509
UF	174553		Protobothrops mangshanensis	Protobothrops_mangshanensis_UF_174553	141.8	28.1	1	20.68	19.35	12.59	5.915	20.015	59.15	1418	0.338377
UF	120361		Protobothrops tokarensis	Protobothrops_tokarensis_UF_120361	74.1	14.7	1	10.31	10.11	7.02	3.855	10.21	38.55	741	0.264851
UF	120362		Protobothrops tokarensis	Protobothrops_tokarensis_UF_120362	73.1	12.5	2	10.07	10.05	7.16	3.727	10.06	37.27	731	0.269922
UF	120220		Pseudocerastes persicus	Pseudocerastes_persicus_UF_120220	52.5	9.2	1	9.73	9.47	10.34	3.305	9.6	33.05	525	0.290469
UF	78407		Pseudocerastes persicus	Pseudocerastes_persicus_UF_78407	67.9	10.4	1	10.47	10.54	10.21	4.155	10.505	41.55	679	0.252828
CAS	8936	CAS8936	Sistrurus catenatus	Sistrurus_catenatus_catenatus_CAS_8936	38.5	3.5	1	4.64	4.72	5.53	2.255	4.68	22.55	385	0.207539
CAS	4018	CAS4018	Sistrurus catenatus	Sistrurus_catenatus_catenatus_CAS-su_4018	61.6	5.1	1	6.13	6.12	5.86	2.816	6.125	28.16	616	0.217507
CAS	192758	CAS192758	Sistrurus catenatus	Sistrurus_catenatus_edwardsii_CAS_192758	32.1	4.3	1	3.34	4.1	3.59	1.875	3.72	18.75	321	0.1984
LACM	105224	LACM105224	Sistrurus catenatus	Sistrurus_catenatus_LACM_105224	50.4	7	1	5.89	5.32	6.94	2.931	5.605	29.31	504	0.191232
LACM	138228	LACM138228	Sistrurus catenatus	Sistrurus_catenatus_LACM_138228	60.2	4.9	1	6.33	6.36	6.29	2.937	6.345	29.37	602	0.216037
LACM	20207	LACM20207	Sistrurus catenatus	Sistrurus_catenatus_LACM_20207	36.1	4.1	1	3.99	3.98	4.48	2.057	3.985	20.57	361	0.193729
LACM	3125	LACM3125	Sistrurus catenatus	Sistrurus_catenatus_LACM_3125	44.2	5.7	1	5.84	6.06	5.95	2.639	5.95	26.39	442	0.225464
LACM	3127	LACM3127	Sistrurus catenatus	Sistrurus_catenatus_LACM_3127	46	6.6	1	5.22	4.98	5.18	2.309	5.1	23.09	460	0.220875
LACM	59162	LACM59162	Sistrurus catenatus	Sistrurus_catenatus_LACM_59162	37	3.7	1	5.93	5.36	4.89	2.378	5.645	23.78	370	0.237384
MVZ	16515	MVZ16515	Sistrurus catenatus	Sistrurus_catenatus_MVZ_16515	63.5	5.2	2	7.1	6.93	5.06	2.871	7.015	28.71	635	0.24434
MVZ	209128	MVZ209128	Sistrurus catenatus	Sistrurus_catenatus_MVZ_209128	37.2	3.7	1	3.32	3.87	4.16	2.135	3.595	21.35	372	0.168384
MVZ	226244	MVZ226244	Sistrurus catenatus	Sistrurus_catenatus_MVZ_226244	36.2	4.2	1	3.81	4.52	4.86	1.967	4.165	19.67	362	0.211744
MVZ	229857	MVZ229857	Sistrurus catenatus	Sistrurus_catenatus_MVZ_229857	56.1	6.4	1	5.78	5.65	5.83	2.898	5.715	28.98	561	0.197205
MVZ	79231	MVZ79231	Sistrurus catenatus	Sistrurus_catenatus_MVZ_79231	34.2	4.5	1	3.72	4.05	4.13	1.938	3.885	19.38	342	0.200464
CAS	100819	CAS100819	Sistrurus catenatus	Sistrurus_catenatus_tergeminus_CAS_100819	35.2	4.4	1	4.54	4.44	4.02	2.044	4.49	20.44	352	0.219667
CAS	100822	CAS100822	Sistrurus catenatus	Sistrurus_catenatus_tergeminus_CAS_100822	31.6	4.1	1	4.22	4.04	3.72	1.955	4.13	19.55	316	0.211253
CAS	100824	CAS100824	Sistrurus catenatus	Sistrurus_catenatus_tergeminus_CAS_100824	33.7	3.5	1	4.66	4.46	4.19	1.988	4.56	19.88	337	0.229376
CAS	100826	CAS100826	Sistrurus catenatus	Sistrurus_catenatus_tergeminus_CAS_100826	29	3.6	1	3.46	4.08	3.4	1.776	3.77	17.76	290	0.212275
CAS	100828	CAS100828	Sistrurus catenatus	Sistrurus_catenatus_tergeminus_CAS_100828	30.5	2.9	2	4.42	3.94	4.17	1.965	4.18	19.65	305	0.212723
CAS	71309	CAS71309	Sistrurus catenatus	Sistrurus_catenatus_tergeminus_CAS_71309	39.1	3.6	2	5.44	5.75	4.64	2.4	5.595	24	391	0.233125
UTA	10998		Sistrurus catenatus	Sistrurus_catenatus_tergeminus_UTA_10998	50.4	4.7	1	5.74	5.77	5.67	2.767	5.755	27.67	504	0.207987
UTA	1334		Sistrurus catenatus	Sistrurus_catenatus_tergeminus_UTA_1334	52.3	4.4	1	7.94	7.73	5.77	2.838	7.835	28.38	523	0.276075
UTA	21923	UTA21923	Sistrurus catenatus	Sistrurus_catenatus_tergeminus_UTA_21923	54.7	5	2	8.62	8.62	6.07	3.247	8.62	32.47	547	0.265476
UTA	21924	UTA21924	Sistrurus catenatus	Sistrurus_catenatus_tergeminus_UTA_21924	62	7.4	1	9.4	9.54	6.82	3.789	9.47	37.89	620	0.249934
UTA	21925	UTA21925	Sistrurus catenatus	Sistrurus_catenatus_tergeminus_UTA_21925	55.6	6.6	1	8.87	8.41	6.28	3.371	8.64	33.71	556	0.256304
UTA	22372	UTA22372	Sistrurus catenatus	Sistrurus_catenatus_tergeminus_UTA_22372	30.9	5.5	1	8.9	8.8	7.23	3.597	8.85	35.97	309	0.246038
UTA	22375	UTA22375	Sistrurus catenatus	Sistrurus_catenatus_tergeminus_UTA_22375	59	8	1	10.1	9.91	7.34	3.36	10.005	33.6	590	0.297768
UTA	22376	UTA22376	Sistrurus catenatus	Sistrurus_catenatus_tergeminus_UTA_22376	68	5.4	2	10.07	9.65	7.59	3.587	9.86	35.87	680	0.274882
UTA	24519		Sistrurus catenatus	Sistrurus_catenatus_tergeminus_UTA_24519	42.5	6	1	5.97	5.31	5.95	2.518	5.64	25.18	425	0.223987
UTA	60457	UTA60457	Sistrurus catenatus	Sistrurus_catenatus_tergeminus_UTA_60457	61	7.5	1	8.62	8.67	7.44	3.655	8.645	36.55	610	0.236525
UTA	6809	UTA6809	Sistrurus catenatus	Sistrurus_catenatus_tergeminus_UTA_6809	48.4	6.1	1	7.33	8.04	4.98	2.772	7.685	27.72	484	0.277237
UTA	9284	UTA9284	Sistrurus catenatus	Sistrurus_catenatus_tergeminus_UTA_9284	58.5	5.3	1	8.45	8.37	5.98	3.396	8.41	33.96	585	0.247644
CAS	10152	CAS10152	Sistrurus miliarius	Sistrurus_miliarius_barbouri_CAS_10152	64	8.8	1	7.57	7.62	9.79	3.438	7.595	34.38	640	0.220913
CAS	11168	CAS11168	Sistrurus miliarius	Sistrurus_miliarius_barbouri_CAS_11168	38.2	4.7	1	5.03	5.7	4.45	2.208	5.365	22.08	382	0.24298
UF	146948		Sistrurus miliarius	Sistrurus_miliarius_barbouri_UF_146948	43.2	6	1	4.6	5.32	5.4	2.432	4.96	24.32	432	0.203947
UF	146950		Sistrurus miliarius	Sistrurus_miliarius_barbouri_UF_146950	37.4	4.9	2	5.44	5.37	4.06	2.374	5.405	23.74	374	0.227675
UF	146955		Sistrurus miliarius	Sistrurus_miliarius_barbouri_UF_146955	39.5	4.8	1	5.15	5.05	4.42	2.402	5.1	24.02	395	0.212323
UF	146957		Sistrurus miliarius	Sistrurus_miliarius_barbouri_UF_146957	53.1	8	1	6.31	6.8	5.89	3.016	6.555	30.16	531	0.217341
UF	146959		Sistrurus miliarius	Sistrurus_miliarius_barbouri_UF_146959	50.8	7.7	1	6.2	5.77	5.11	2.72	5.985	27.2	508	0.220037
UF	146960		Sistrurus miliarius	Sistrurus_miliarius_barbouri_UF_146960	36	4.6	2	5.25	5.23	4.11	2.445	5.24	24.45	360	0.214315
UF	146963		Sistrurus miliarius	Sistrurus_miliarius_barbouri_UF_146963	40.1	6.2	1	5.57	5.23	4.4	2.362	5.4	23.62	401	0.22862
UF	146964		Sistrurus miliarius	Sistrurus_miliarius_barbouri_UF_146964	37.7	5.8	1	5.11	5.09	4.55	2.301	5.1	23.01	377	0.221643
UF	146965		Sistrurus miliarius	Sistrurus_miliarius_barbouri_UF_146965	48.4	6.4	1	6.2	5.87	6.33	2.597	6.035	25.97	484	0.232384
CAS	214326	CAS214326	Sistrurus miliarius	Sistrurus_miliarius_CAS_214326	35.1	4.4	2	4.17		5.8	2.154	4.17	21.54	351	0.193593
CAS	245556	CAS245556	Sistrurus miliarius	Sistrurus_miliarius_CAS_245556	38.9	6.3	1	4.23	3.98	5	2.307	4.105	23.07	389	0.177937
CAS	259372	CAS259372	Sistrurus miliarius	Sistrurus_miliarius_CAS_259372	46.5	5.6	1	6.23	7.1	6.92	2.733	6.665	27.33	465	0.243871
UTA	25121		Sistrurus miliarius	Sistrurus_miliarius_miliarius_UTA_25121	50.5	7.2	1	6.31	6	6.17	2.779	6.155	27.79	505	0.221483
UTA	6776	UTA6776	Sistrurus miliarius	Sistrurus_miliarius_miliarius_UTA_6776	26.6	3.8	1	4.49	4.49	3.45	1.78	4.49	17.8	266	0.252247
UTA	6777	UTA6777	Sistrurus miliarius	Sistrurus_miliarius_miliarius_UTA_6777	30.8	3.3	2	4.57	4.22	3.46	1.894	4.395	18.94	308	0.232049
MVZ	110880	MVZ110880	Sistrurus miliarius	Sistrurus_miliarius_MVZ_110880	52.2	8.1	1	5.65	5.79	5.72	2.545	5.72	25.45	522	0.224754
MVZ	38465	MVZ38465	Sistrurus miliarius	Sistrurus_miliarius_MVZ_38465	43.2	6.5	1	4.81	5.33	4.23	2.205	5.07	22.05	432	0.229932
MVZ	64700	MVZ64700	Sistrurus miliarius	Sistrurus_miliarius_MVZ_64700	43.5	5.9	1	4.84	5.03	4.8	2.267	4.935	22.67	435	0.217689
CAS	10903	CAS10903	Sistrurus miliarius	Sistrurus_miliarius_streckeri_CAS_10903	25.8	3.2	1	3.77	3.34	3.52	1.845	3.555	18.45	258	0.192683
CAS	33205	CAS33205	Sistrurus miliarius	Sistrurus_miliarius_streckeri_CAS_33205	33.6	4.4	2		4.41	4.29	2.13	4.41	21.3	336	0.207042
CAS	33258	CAS33258	Sistrurus miliarius	Sistrurus_miliarius_streckeri_CAS_33258	42.5	6.8	1	5.61	5.58	5.4	2.572	5.595	25.72	425	0.217535
CAS	33259	CAS33259	Sistrurus miliarius	Sistrurus_miliarius_streckeri_CAS_33259	42.5	5.2	1	6.06	6.35	6.13	2.59	6.205	25.9	425	0.239575
CAS	33262	CAS33262	Sistrurus miliarius	Sistrurus_miliarius_streckeri_CAS_33262	37.7	5.7	1	4.15	4.96	5.07	2.323	4.555	23.23	377	0.196083
CAS	33264	CAS33264	Sistrurus miliarius	Sistrurus_miliarius_streckeri_CAS_33264	38.4	5.4	1		4.3	4.63	2.279	4.3	22.79	384	0.188679
CAS	74416	CAS74416	Sistrurus miliarius	Sistrurus_miliarius_streckeri_CAS_74416	33	4.6	1	3.79	3.07	4.5	2.15	3.43	21.5	330	0.159535
UTA	1332	UTA1332	Sistrurus miliarius	Sistrurus_miliarius_streckeri_UTA_1332	33		2	5.21	5.13	5.54	2.114	5.17	21.14	330	0.24456
UTA	15671	UTA15671	Sistrurus miliarius	Sistrurus_miliarius_streckeri_UTA_15671	34.3	5.1	1	5.1	4.92	3.44	2.175	5.01	21.75	343	0.230345
UTA	18029	UTA18029	Sistrurus miliarius	Sistrurus_miliarius_streckeri_UTA_18029	34	4.3	2	4.27	4.67	3.81	2.202	4.47	22.02	340	0.202997
UTA	2294	UTA2294	Sistrurus miliarius	Sistrurus_miliarius_streckeri_UTA_2294	40	5.1	2	5.12	4.58	4.47	2.395	4.85	23.95	400	0.202505
UTA	26540	UTA26540	Sistrurus miliarius	Sistrurus_miliarius_streckeri_UTA_26540	33.7	4.5	1	4.36	4.32	4.01	2.203	4.34	22.03	337	0.197004
UTA	28259	UTA28259	Sistrurus miliarius	Sistrurus_miliarius_streckeri_UTA_28259	34.1	5	2	4.37	4.4	4.51	2.099	4.385	20.99	341	0.208909
UTA	35216		Sistrurus miliarius	Sistrurus_miliarius_streckeri_UTA_35216	30.4	5	1	3.94	3.94	5.28	1.87	3.94	18.7	304	0.210695
UTA	35217		Sistrurus miliarius	Sistrurus_miliarius_streckeri_UTA_35217	31.8	4	2	4.71	4.6	4.74	2.119	4.655	21.19	318	0.219679
UTA	56016	UTA56016	Sistrurus miliarius	Sistrurus_miliarius_streckeri_UTA_56016	41.2	6.2	1	6.3	6.13	5.54	2.596	6.215	25.96	412	0.239407
UTA	63413	UTA63413	Sistrurus miliarius	Sistrurus_miliarius_streckeri_UTA_63413	40.7	5.5	1	5.42	5.22	5.18	2.482	5.32	24.82	407	0.214343
MVZ	226620	MVZ226620	Trimeresurus albolabris	Trimeresurus_albolabris_MVZ_226620	45.4	7.4	2	5.74	6.33	5.08	2.399	6.035	23.99	454	0.251563
MVZ	226622	MVZ226622	Trimeresurus albolabris	Trimeresurus_albolabris_MVZ_226622	59.8	10.6	2	7.53	6.88	5.32	3.104	7.205	31.04	598	0.23212
MVZ	226625	MVZ226625	Trimeresurus albolabris	Trimeresurus_albolabris_MVZ_226625	37	5.8	2	5.54	5.37	4.6	2.166	5.455	21.66	370	0.251847
MVZ	23898	MVZ23898	Trimeresurus albolabris	Trimeresurus_albolabris_MVZ_23898	57.5	10.4	1	9.9	9.86	5.63	3.173	9.88	31.73	575	0.311377
MVZ	23899	MVZ23899	Trimeresurus albolabris	Trimeresurus_albolabris_MVZ_23899	85	13.9	1		12.09	9.71	3.59	12.09	35.9	850	0.336769
MVZ	23903	MVZ23903	Trimeresurus albolabris	Trimeresurus_albolabris_MVZ_23903	63.2	9.6	1		9.08	6.01	3.165	9.08	31.65	632	0.286888
MVZ	258152	MVZ258152	Trimeresurus albolabris	Trimeresurus_albolabris_MVZ_258152	65.2	18	1	8.93	9.01	6.3	3.165	8.97	31.65	652	0.283412
MVZ	200847	MVZ200847	Protobothrops elegans	Trimeresurus_elegans_MVZ_200847	103.5	23	1	15.36	15.18	10.35	4.98	15.27	49.8	1035	0.306627
CAS	239352	CAS239352	Trimeresurus erythrurus	Trimeresurus_erythrurus_CAS_239352	61.6	11.3	2	10.02	9.44	7	3.556	9.73	35.56	616	0.273622
MVZ	268938	MVZ268938	Trimeresurus fasciatus	Trimeresurus_fasciatus_MVZ_268938	54.2	8.1	2	7.79	8.23	5.72	3.045	8.01	30.45	542	0.263054
CAS	61545	CAS61545	Trimeresurus flavomaculatus	Trimeresurus_flavomaculatus_CAS_61545	91.9	16.5	1	12.2	12.69	10.78	4.5	12.445	45	919	0.276556
CAS	62551	CAS62551	Trimeresurus flavomaculatus	Trimeresurus_flavomaculatus_CAS_62551	95		2	12.83	13.74	8.51	4.865	13.285	48.65	950	0.273073
MVZ	23904	MVZ23904	Protobothrops flavoviridis	Trimeresurus_flavoviridis_MVZ_23904	116.5	21.2	1	14.64	16.17	8.67	4.929	15.405	49.29	1165	0.312538
MVZ	57922	MVZ57922	Protobothrops flavoviridis	Trimeresurus_flavoviridis_MVZ_57922	112.5	22	1		15.69	7.5	4.657	15.69	46.57	1125	0.336912
CAS	18748	CAS18748	Trimeresurus gramineus	Trimeresurus_gramineus_CAS_18748	44.6	11.7	1	4.95	4.78	5.2	2.269	4.865	22.69	446	0.214412
CAS	18751	CAS18751	Trimeresurus gramineus	Trimeresurus_gramineus_CAS_18751	45.7	11.1	1	4.91	4.91	6.63	2.321	4.91	23.21	457	0.211547
CAS	242722	CAS242722	Trimeresurus gumprechti	Trimeresurus_gumprechti_CAS_242722	78.2	16.5	2	11.95	11.62	8.44	3.936	11.785	39.36	782	0.299416
MVZ	226641	MVZ226641	Trimeresurus gumprechti	Trimeresurus_gumprechti_MVZ_226641	55.5	14.5	1	6.6		5.91	2.86	6.6	28.6	555	0.230769
MVZ	272247	MVZ272247	Trimeresurus hageni	Trimeresurus_hageni_MVZ_272247	62	10.7	2	10.02	9.82	7.86	3.64	9.92	36.4	620	0.272527
MVZ	272248	MVZ272248	Trimeresurus hageni	Trimeresurus_hageni_MVZ_272248	62.4	16.5	1	7.93	8.22	6.39	2.914	8.075	29.14	624	0.277111
UTA	55262	UTA55262	Trimeresurus insularis	Trimeresurus_insularis_UTA_55262	46	8.8	2	6.94	7.46	6.71	2.579	7.2	25.79	460	0.279178
UTA	9621	UTA9621	Trimeresurus kanburiensis	Trimeresurus_kanburiensis_UTA_9621	60.5	10.6	1	7.47	7.15	6.59	2.854	7.31	28.54	605	0.256132
MVZ	258153	MVZ258153	Trimeresurus macrops	Trimeresurus_macrops_MVZ_258153	43.2	12.2	1	5.4	4.86	5.03	2.341	5.13	23.41	432	0.219137
UTA	21976	UTA21976	Trimeresurus mcgregori	Trimeresurus_mcgregori_UTA_21976	83.2	14	2	12.42	12.64	8.93	3.881	12.53	38.81	832	0.322855
MVZ	226628	MVZ226628	Protobothrops mucrosquamatus	Trimeresurus_mucrosquamatus_MVZ_226628	79.8	18.2	1	11.98	10.42	7.26	3.631	11.2	36.31	798	0.308455
MVZ	226632	MVZ226632	Protobothrops mucrosquamatus	Trimeresurus_mucrosquamatus_MVZ_226632	87	22	1	16.88	17.03	6.88	4.008	16.955	40.08	870	0.423029
MVZ	226633	MVZ226633	Protobothrops mucrosquamatus	Trimeresurus_mucrosquamatus_MVZ_226633	77.4	17.2	1	12.38	12.54	5.6	3.533	12.46	35.33	774	0.352675
MVZ	230461	MVZ230461	Protobothrops mucrosquamatus	Trimeresurus_mucrosquamatus_MVZ_230461	86	23.5	1	13.97	14.18	8.17	4.138	14.075	41.38	860	0.34014
MVZ	272252	MVZ272252	Trimeresurus popeiorum	Trimeresurus_popeiorum_MVZ_272252	47.2	14	1	5.67	6.03	5.81	2.692	5.85	26.92	472	0.217311
UTA	63084	UTA63084	Trimeresurus puniceus	Trimeresurus_puniceus_UTA_63084	46.9	8.7	1	8.21	7.74	5.49	2.631	7.975	26.31	469	0.303117
CAS	212245	CAS212245	Trimeresurus purpureomaculatus	Trimeresurus_purpureomaculatus_CAS_212245	90	16.7	2	15.06	14.26	10.61	5.179	14.66	51.79	900	0.283066
CAS	219772	CAS219772	Trimeresurus purpureomaculatus	Trimeresurus_purpureomaculatus_CAS_219772	57.4	11.4	2	10.05	9.96	7.77	3.514	10.005	35.14	574	0.284718
CAS	135750	CAS135750	Trimeresurus septentrionalis	Trimeresurus_septentrionalis_CAS_135750	63.6	11.7	1	8.78	10.2	6.07	3.343	9.49	33.43	636	0.283877
MVZ	22328	MVZ22328	Trimeresurus stejnegeri	Trimeresurus_stejnegeri_MVZ_22328	53.5	11	1	7.25	6.66	6.99	3.129	6.955	31.29	535	0.222275
MVZ	236760	MVZ236760	Trimeresurus stejnegeri	Trimeresurus_stejnegeri_MVZ_236760	59	13	2	8.46	9.06	5.93	3.205	8.76	32.05	590	0.273323
MVZ	23924	MVZ23924	Trimeresurus stejnegeri	Trimeresurus_stejnegeri_MVZ_23924	57.8	14.3	1	7.55	6.71	5.04	2.792	7.13	27.92	578	0.255372
MVZ	23925	MVZ23925	Trimeresurus stejnegeri	Trimeresurus_stejnegeri_MVZ_23925	59.6	14.2	1	8.66	8.54	4.75	3.045	8.6	30.45	596	0.28243
CAS	117460	CAS117460	Trimeresurus tibetanus	Trimeresurus_tibetanus_CAS_117460	54.5	9.3	2	6.95	6.09	6.9	2.753	6.52	27.53	545	0.236833
UTA	25103	UTA25103	Trimeresurus trigonocephalus	Trimeresurus_trigonocephalus_UTA_25103	95.9	15	2	15.12	15.18	8.65	5.412	15.15	54.12	959	0.279933
MVZ	222324	MVZ222324	Trimeresurus vogeli	Trimeresurus_vogeli_MVZ_222324	55.5	13.5	1	7.17	7.13	5.25	2.667	7.15	26.67	555	0.268091
UTA	50567	UTA50567	Trimeresurus wiroti	Trimeresurus_wiroti_UTA_50567	66.8	11.4	1	14.17	13.09	8.3	4.096	13.63	40.96	668	0.332764
CAS	234261	CAS234261	Trimeresurus yunnanensis	Trimeresurus_yunnanensis_CAS_234261	69	18.4	1	8.55	8.78	7.32	3.482	8.665	34.82	690	0.248851
MVZ	253953	MVZ253953	Tropidolaemus subannulatus	Tropidolaemus_subannulatus_MVZ_253953	77.5	14.5	1	13.79	13.52	12.94	5.407	13.655	54.07	775	0.252543
MVZ	272254	MVZ272254	Tropidolaemus wagleri	Tropidolaemus_wagleri_MVZ_272254	57.6	9.2	1	10.13	11.04	7.78	3.862	10.585	38.62	576	0.274081
MVZ	272257	MVZ272257	Tropidolaemus wagleri	Tropidolaemus_wagleri_MVZ_272257	54	10	2	9.72	10.04	9.36	3.681	9.88	36.81	540	0.268405
MVZ	272260	MVZ272260	Tropidolaemus wagleri	Tropidolaemus_wagleri_MVZ_272260	75.6	12.3	1	12.86	13.32	14.67	5.163	13.09	51.63	756	0.253535
MVZ	8445	MVZ8445	Vipera ammodytes	Vipera_ammodytes_MVZ_8445	34	3.6	1	3.56	4.2	5.37	2.167	3.88	21.67	340	0.179049
MVZ	215972	MVZ215972	Vipera aspis	Vipera_aspis_MVZ_215972	28.1	4	1	4.34	4.65	4.18	1.923	4.495	19.23	281	0.233749
MVZ	61538	MVZ61538	Vipera aspis	Vipera_aspis_MVZ_61538	34.6	5	1		4.26	4.94	2.177	4.26	21.77	346	0.195682
MVZ	61539	MVZ61539	Vipera aspis	Vipera_aspis_MVZ_61539	38.5	4.4	2	3.83	3.81	3.55	2.364	3.82	23.64	385	0.161591
MVZ	281585	MVZ281585	Vipera berus	Vipera_berus_MVZ_281585	51	6.3	2	4.2	4.63	4.42	2.638	4.415	26.38	510	0.167362
MVZ	281586	MVZ281586	Vipera berus	Vipera_berus_MVZ_281586	51	6.7	1	4.33	5.01	4.8	2.47	4.67	24.7	510	0.189069
MVZ	43704	MVZ43704	Vipera berus	Vipera_berus_MVZ_43704	40.3	6	1	3.62	3.43	4.2	2.223	3.525	22.23	403	0.15857
MVZ	52162	MVZ52162	Vipera berus	Vipera_berus_MVZ_52162	46.4	6.8	1	3.87	4.16	3.74	2.419	4.015	24.19	464	0.165978
MVZ	67920	MVZ67920	Vipera berus	Vipera_berus_MVZ_67920	52.1	4.3	2	4.47	4.79	6.43	2.822	4.63	28.22	521	0.164068
CAS	94491	CAS94491	Vipera kaznakovi	Vipera_kaznakovi_CAS_94491	46	5.6	1	4.31		4.37	2.314	4.31	23.14	460	0.186258
UTA	9359	UTA9359	Vipera latastei	Vipera_latasti_UTA_9359	44.2	5.9	1	5.27	5.73	6.41	2.535	5.5	25.35	442	0.216963
CAS	218070	CAS218070	Macrovipera lebetina	Vipera_lebetina_CAS_218070	69.8	10.6	1	7.82	8	9.26	3.299	7.91	32.99	698	0.23977
UTA	8226	UTA8226	Daboia mauritanica	Vipera_mauritanica_deseti_UTA_8226	91.6	11.7	1	12.65	12.28	11.53	4.736	12.465	47.36	916	0.263197
CAS	135746	CAS135746	Montivipera raddei	Vipera_raddei_CAS_135746	64.4	3.4	1	6.84	6.9	7.72	3.156	6.87	31.56	644	0.217681
CAS	55197	CAS55197	Vipera ursinii	Vipera_ursini_CAS_55197	33.6	4.6	1	3.26		3.89	1.839	3.26	18.39	336	0.17727
CAS	135748	CAS135748	Montivipera xanthina	Vipera_xanthina_CAS_135748	68.7	8	1	6.4	6.98	7.71	3.423	6.69	34.23	687	0.195443
CLP	2469		Agkistrodon bilineatus		34	7.5	2	6.72	7.48	6.6	2.701	7.1	27.01	340	0.262866
CLP	2470		Agkistrodon bilineatus		74.5	16.1	2	12.66	13.13	12.42	4.767	12.895	47.67	745	0.270506
CLP	2623		Agkistrodon russeolus		80.5	17	1	10.8	10.3	11.7	4.949	10.55	49.49	805	0.213174
CLP	2351		Atropoides nummifer		58	7.5	2	10.8	11.3	7.9	4.084	11.05	40.84	580	0.270568
CLP	2373		Atropoides nummifer		45.6	6	2	8.73	8.7	8.5	3.446	8.715	34.46	456	0.252902
CLP	2376		Atropoides occiduus		57.5	6.6	2	11.28	12.23	9.04	4.7	11.755	47	575	0.250106
CLP	2481		Bothriechis aurifer		70.8	14.6	1	12.19	11.92	8.96	3.602	12.055	36.02	708	0.334675
CLP	2365		Bothriechis bicolor		49.9	9.1	2	8.18	8.21	6.67	2.974	8.195	29.74	499	0.275555
CLP	2500		Bothriechis guifarroi		48.4	10.5	1	4.47	4.13	5.46	2.276	4.3	22.76	484	0.188928
CLP	2535		Bothriechis guifarroi		43.3	9.3	2	3.78	3.72	4.87	2.221	3.75	22.21	433	0.168843
CLP	2536		Bothriechis guifarroi		56.5	10.7	1	6.6	6.16	7.4	2.541	6.38	25.41	565	0.251082
CLP	2537		Bothriechis guifarroi		85.3	16	1	9.48	9.75	8.76	4.059	9.615	40.59	853	0.236881
CLP	2613		Bothriechis guifarroi		66.6	14.5	1	5.85	6.2	7.21	3.023	6.025	30.23	666	0.199305
CLP	2545		Bothriechis marchi		62.8	12.1	2	7.67	7.16	7.14	3.291	7.415	32.91	628	0.225311
CLP	2565		Bothriechis marchi		38.9	8.3	1	2.51	2.61	3.93	1.917	2.56	19.17	389	0.133542
CLP	2475		Bothriechis rowleyi		35.5	8.3	2	4.81	4.59	5.19	2.118	4.7	21.18	355	0.221907
CLP	2482		Bothriechis rowleyi		61	13.7	2	10.79	9.33	8.57	3.354	10.06	33.54	610	0.29994
CLP	2568		Bothriechis schlegelii		79.2	11.8	2	8.77	8.9	10.11	4.012	8.835	40.12	792	0.220214
CLP	2331		Bothrops asper		89	14	1	17	16	8	4.9	16.5	49	890	0.336735
CLP	2625		Bothrops asper		95.5	12.5	2	11.8	12.3	10.5	4.292	12.05	42.92	955	0.280755
CLP	2359		Cerrophidion godmani		46.5	5.9	2	6.38	6.7	5.88	2.762	6.54	27.62	465	0.236785
CLP	2360		Cerrophidion godmani		34.3	4.6	2	2.98	4.7	4.23	2.056	3.84	20.56	343	0.18677
CLP	2361		Cerrophidion godmani		38.2	5.4	1	5.02	5.07	6.08	2.41	5.045	24.1	382	0.209336
CLP	2362		Cerrophidion godmani		42	5.1	2	4.87	5.45	4.92	2.492	5.16	24.92	420	0.207063
CLP	2377		Cerrophidion godmani		36.3	5.1	2	4.22	4.62	5.36	2.449	4.42	24.49	363	0.180482
CLP	2378		Cerrophidion godmani		45	6.5	1	6.39	6.31	6.69	2.75	6.35	27.5	450	0.230909
CLP	2324		Cerrophidion petlalcalensis		36.1	5.9	1	4.48	4.9	4.82	2.22	4.69	22.2	361	0.211261
CLP	2326		Cerrophidion petlalcalensis		41.9	4.7	2	4.79	4.89	5.21	2.427	4.84	24.27	419	0.199423
CLP	2327		Cerrophidion petlalcalensis		36.7	5.2	1		4.85	4.31	2.066	4.85	20.66	367	0.234753
CLP	2364		Cerrophidion tzotzilorum		35.5	4.9	2	5.24	5.19	4.32	2.152	5.215	21.52	355	0.242333
CLP	2366		Cerrophidion tzotzilorum		37	4.6	2	6.12	6.14	6.18	2.515	6.13	25.15	370	0.243738
CLP	2290		Crotalus aquilus		30	3.7	1	4.87	4.83	3.78	1.984	4.85	19.84	300	0.244456
CLP	2291		Crotalus aquilus		36.2	2.9	2	4.49	5.03	3.84	2.121	4.76	21.21	362	0.224422
CLP	2299		Crotalus aquilus		38	3.4	2	6.05	6.1	4.37	2.41	6.075	24.1	380	0.252075
CLP	2301		Crotalus aquilus		48	5	1		7.29	9.58	2.818	7.29	28.18	480	0.258694
CLP	2302		Crotalus aquilus		45.8	5.2	1	6.61	6.98	8.12	2.667	6.795	26.67	458	0.254781
CLP	2412		Crotalus aquilus		31.7	2.8	2	4.1	3.75	4.48	1.956	3.925	19.56	317	0.200665
CLP	2413		Crotalus aquilus		37.3	4.1	1	3.95	4.1	4.38	2.012	4.025	20.12	373	0.20005
CLP	2414		Crotalus aquilus		55.5	5.9	1	5.46	5.37	6.48	2.684	5.415	26.84	555	0.201751
CLP	2402		Crotalus armstrongi		55.8	4.2	1	7.35	7.4	7.84	3.041	7.375	30.41	558	0.242519
CLP	2472		Crotalus armstrongi		43.4	5.3	1	8.71	7.96	6.19	3.14	8.335	31.4	434	0.265446
CLP	2332		Crotalus atrox		84.5	8	1	13	13	10	5	13	50	845	0.26
CLP	2466		Crotalus basiliscus		141.5	14.5	1	19.24	19.12	18	6.083	19.18	60.83	1415	0.315305
CLP	2467		Crotalus basiliscus		137.5	13.4	1	16.81	18.33	17.53	5.496	17.57	54.96	1375	0.319687
CLP	2468		Crotalus basiliscus		152	11	2	21.16	19.58	17.24	6.272	20.37	62.72	1520	0.324777
CLP	2396		Crotalus campbelli		51	6.5	1	6.41	7.11	7.02	3.044	6.76	30.44	510	0.222076
CLP	2397		Crotalus campbelli		47.8	5.8	1	5.92	6.73	6.41	2.728	6.325	27.28	478	0.231855
CLP	2398		Crotalus campbelli		52.8	5.3	2	6.33	7	6.39	3.021	6.665	30.21	528	0.220622
CLP	2408		Crotalus culminatus					12.04	11.91	7.86	3.853	11.975	38.53		0.310797
CLP	2409		Crotalus culminatus					18.63	18.34	9.63	4.768	18.485	47.68		0.387689
CLP	2471		Crotalus culminatus		95.8	9.9	1	15.11	16.59	13.96	4.739	15.85	47.39	958	0.334459
CLP	2636		Crotalus enyo		49	5	1	9.08	9.46	5.8	2.491	9.27	24.91	490	0.37214
CLP	2638		Crotalus enyo		62	6.5	1	9.92	9.97	6.76	3.046	9.945	30.46	620	0.326494
CLP	2644		Crotalus enyo		53	6	1	10.04	9.79	6.67	2.5	9.915	25	530	0.3966
CLP	2645		Crotalus enyo		64	6.5	1	7.11	6.99	5.5	2.862	7.05	28.62	640	0.246331
CLP	2655		Crotalus enyo		59.5	5.5	1	9.77	9.05	5.4	2.915	9.41	29.15	595	0.322813
CLP	2391		Crotalus ericsmithi		46.5	7.5	1	8.64	9.05	3.79	2.385	8.845	23.85	465	0.37086
CLP	2323		Crotalus intermedius		31.5	2.4	1	2.31	2.57	3.67	1.569	2.44	15.69	315	0.155513
CLP	2394		Crotalus lannomi		49.5	5.2	2	9.28	9.04	5.12	2.915	9.16	29.15	495	0.314237
CLP	2484		Crotalus lannomi					8.68	8.91	5.26	2.561	8.795	25.61		0.343421
CLP	2258		Crotalus lepidus		57	5	1	4.8	5.1	9.5	2.912	4.95	29.12	570	0.169986
CLP	2268		Crotalus lepidus		50	5.2	1	6	5.9	5.3	2.448	5.95	24.48	500	0.243056
CLP	2346		Crotalus lepidus		35.8	2.9	1	3.42	3.29	3.56	1.97	3.355	19.7	358	0.170305
CLP	2639		Crotalus mitchellii		71	5	1	10.03	9.1	7.32	3.3	9.565	33	710	0.289848
CLP	2640		Crotalus mitchellii		45.5	4	1	6.65	6.51	5.5	2.336	6.58	23.36	455	0.281678
CLP	2646		Crotalus mitchellii		75	4.5	2	9.81	9.96	6.83	3.183	9.885	31.83	750	0.310556
CLP	2647		Crotalus mitchellii		73	4.5	2	9.57	10.08	9.08	3.282	9.825	32.82	730	0.29936
CLP	2648		Crotalus mitchellii		75	6	1	10.75	10.56	7.34	3.212	10.655	32.12	750	0.331725
CLP	2656		Crotalus mitchellii		62	5	1	8.68	8.69	6.79	2.966	8.685	29.66	620	0.292819
CLP	2657		Crotalus mitchellii		51.5	3.5	2	7.8	7.14	5.22	2.488	7.47	24.88	515	0.300241
CLP	2658		Crotalus mitchellii		54	4	1	7.21	7.23	5.69	2.612	7.22	26.12	540	0.276417
CLP	2671		Crotalus mitchellii		78	7	1	9.65	9.8	8.06	3.356	9.725	33.56	780	0.289779
CLP	2672		Crotalus mitchellii		78	7	1	9.28	8.32	8.69	3.605	8.8	36.05	780	0.244105
CLP	2260		Crotalus molossus		96	7.5	1	21.79	18.99	11.73	5.461	20.39	54.61	960	0.373375
CLP	2270		Crotalus molossus		74	3.5	2	13.57	14.92	8.01	4.279	14.245	42.79	740	0.332905
CLP	2271		Crotalus molossus		75	5.5	1	13.1	11.94	7.37	4.179	12.52	41.79	750	0.299593
CLP	2330		Crotalus molossus		70.5	4.6		15	16	10.5	5.3	15.5	53	705	0.292453
CLP	2350		Crotalus molossus		98.5	10		18	18	16	6.55	18	65.5	985	0.274809
CLP	2403		Crotalus morulus		43.5	3.6	2	5.09	5.03	5.87	2.314	5.06	23.14	435	0.218669
CLP	2404		Crotalus morulus		47	3.7	2	5.58	6.14	6.56	2.685	5.86	26.85	470	0.21825
CLP	2405		Crotalus morulus		44	3.8	2	4.8	5.16	5.83	2.53	4.98	25.3	440	0.196838
CLP	2485		Crotalus oreganus		99.1	9.1	1	9.86	11.74	13.3	4.314	10.8	43.14	991	0.250348
CLP	2486		Crotalus oreganus		99.5	8.6	1	11.37	12.28	11.79	4.425	11.825	44.25	995	0.267232
CLP	2399		Crotalus polystictus		65.7	4.3	2	9.16	9.18	6.46	3.37	9.17	33.7	657	0.272107
CLP	2400		Crotalus polystictus		42.6	3.2	2	6.28	6.41	4.95	2.349	6.345	23.49	426	0.270115
CLP	2401		Crotalus polystictus		36.8	3.6	1	5.45	5.57	5.11	2.263	5.51	22.63	368	0.243482
CLP	2254		Crotalus pricei		41.8	5.1	1	4	4.5	6.5	2.5	4.25	25	418	0.17
CLP	2255		Crotalus pricei		38	3.2	2	4.28	3.73	4.84	1.956	4.005	19.56	380	0.204755
CLP	2256		Crotalus pricei		43.5	4	2	3.55	3.75	4.87	2.036	3.65	20.36	435	0.179273
CLP	2273		Crotalus pricei		34.8	4.5		3	3.8	3.8	2.1	3.4	21	348	0.161905
CLP	2274		Crotalus pricei		39.5	3.5		4	4.5	4.5	2.25	4.25	22.5	395	0.188889
CLP	2483		Crotalus pusillus		57	7.6	1	10.12	9.46	7.5	3.499	9.79	34.99	570	0.279794
CLP	2380		Crotalus ravus		62	7.2	1	7.85	7.5	8.4	3.331	7.675	33.31	620	0.230411
CLP	2406		Crotalus ravus		42.1	4.1	2	5.25	5.32	5.53	2.336	5.285	23.36	421	0.226241
CLP	2635		Crotalus ruber		66.5	4.5	1	11.08	11.32	7.32	3.295	11.2	32.95	665	0.339909
CLP	2642		Crotalus ruber		77	5.5	1	12.11	13.29	6.99	3.659	12.7	36.59	770	0.347089
CLP	2643		Crotalus ruber		74	5.5	1	15.26	15.5	6.35	3.818	15.38	38.18	740	0.402829
CLP	2659		Crotalus ruber		65	3.5	2	9.52	9.27	6.84	3.369	9.395	33.69	650	0.278866
CLP	2261		Crotalus scutulatus		53	4.3	1	8.16	9.53	6.56	3.035	8.845	30.35	530	0.291433
CLP	2262		Crotalus scutulatus		74	6	1	11.51	11.83	8.28	3.933	11.67	39.33	740	0.29672
CLP	2333		Crotalus scutulatus		55	3.5	2	8	7.5	8	4.1	7.75	41	550	0.189024
CLP	2389		Crotalus scutulatus		76.2	7.3	1	7.63	8.01	10.08	3.781	7.82	37.81	762	0.206824
CLP	2390		Crotalus scutulatus		73.5	4.7	2	7.54	8.44	8.66	3.794	7.99	37.94	735	0.210596
CLP	2353		Crotalus simus		113.5	8.4	2	20	20	15	7	20	70	1135	0.285714
CLP	2385		Crotalus simus		31.5	3.3	1	5.89	5.96	4.66	2.187	5.925	21.87	315	0.270919
CLP	2620		Crotalus simus		81.5	7	1	13.1	13.5	12	4.277	13.3	42.77	815	0.310966
CLP	2621		Crotalus simus		91.5	7	1	13.6	13.2	12.1	4.52	13.4	45.2	915	0.29646
CLP	2717		Crotalus stephensi		64.8	4	2	6.79	7.48	6.53	3.005	7.135	30.05	648	0.237438
CLP	2719		Crotalus stephensi		83	7.5	1	8.67	8.76	10.17	3.794	8.715	37.94	830	0.229705
CLP	2720		Crotalus stephensi		53.7	4	2	6.32	6.02	6.07	2.521	6.17	25.21	537	0.244744
CLP	2392		Crotalus totonacus		138.5	12.5	1	15.24	16.15	11.32	5.703	15.695	57.03	1385	0.275206
CLP	2393		Crotalus totonacus		142.5	12.8	1	17.63	16.31	16.08	6.182	16.97	61.82	1425	0.274507
CLP	2474		Crotalus totonacus		110.5	10	1	15.86	18.38	13.56	4.908	17.12	49.08	1105	0.348818
CLP	2358		Crotalus transversus		38.8	4.1	1		3.68	3.39	1.914	3.68	19.14	388	0.192268
CLP	2310		Crotalus triseriatus		56.5	6.8	1	9.6	9.9	7.9	4.2	9.75	42	565	0.232143
CLP	2313		Crotalus triseriatus		51	4	2	7.89	7.22	5.78	2.767	7.555	27.67	510	0.273039
CLP	2356		Crotalus triseriatus		33.8	4.7	1	5.3	6.04	5.22	2.341	5.67	23.41	338	0.242204
CLP	2357		Crotalus triseriatus		46.4	4.4	2	6.42	6.77	5.45	2.768	6.595	27.68	464	0.238259
CLP	2395		Crotalus triseriatus		47.5	5.5	1	5.11	5.84	6.75	2.702	5.475	27.02	475	0.202628
CLP	2628		Crotalus tzabcan		63	4.5	1	10.6	9.8	8.9	3.559	10.2	35.59	630	0.286597
CLP	2257		Crotalus willardi		41.7	5.4	1	7	6.2	6.8	2.55	6.6	25.5	417	0.258824
CLP	2317		Mixcoatlus melanurus		33.7	4.6	2	3.95	4.62	4.27	1.994	4.285	19.94	337	0.214895
CLP	2348		Mixcoatlus melanurus		32.1	4.3	2	3.32	3.73	4.29	1.932	3.525	19.32	321	0.182453
CLP	2369		Ophryacus sphenophrys		43.6	7.4	2	5.95	6.13	5.16	2.409	6.04	24.09	436	0.250726
CLP	2370		Ophryacus sphenophrys		47.9	8.2	2	6.65	7.29	6	2.732	6.97	27.32	479	0.255124
CLP	2325		Ophryacus undulatus		55.3	7	2	6.87	7.55	6.47	2.731	7.21	27.31	553	0.264006
CLP	2480		Porthidium hespere		44.3	7.7	1	8.28	7.51	6.51	2.512	7.895	25.12	443	0.314291
FSU-DRR	105		Crotalus adamanteus	FSU1	127.5	7.6	2	20.9	20.19	16.2	6.446	20.545	64.46	1275	0.318725
FSU-DRR	106		Crotalus adamanteus	FSU2	127.5	11.5	1	17.9	18.82	14.83	6.806	18.36	68.06	1275	0.269762
FSU-DRR	149		Crotalus adamanteus	FSU3	108.5	10.5	1	17.69	17.09	10.81	5.665	17.39	56.65	1085	0.306973
FSU-DRR	178		Crotalus adamanteus	FSU4	146.6	13.6	1	20.78	19.43	12.3	6.436	20.105	64.36	1466	0.312383
FSU-DRR	182		Crotalus adamanteus	FSU5	123.5	8.4	2	19.8	19.1	14.1	6.244	19.45	62.44	1235	0.311499
FSU-DRR	183		Crotalus adamanteus	FSU6	93.5	8.8	1	16.91	16.62	9.79	5.394	16.765	53.94	935	0.310808
FSU-DRR	85		Crotalus horridus	FSU7	96.5	9.5	2	12.49	12.49	11.15	4.25	12.49	42.5	965	0.293882
FSU-KW	944		Crotalus adamanteus	FSU8	116.5	11	1	17.07	19.31	13.87	5.82	18.19	58.2	1165	0.312543
FSU-KW	2161		Crotalus adamanteus	FSU9	134	11	1	18.84	20.01	11.17	6.466	19.425	64.66	1340	0.300418
FSU-MM	127		Crotalus adamanteus	FSU10	136.5	12.9	1	19.95	20.08	18.99	6.911	20.015	69.11	1365	0.289611
IBSP	86116		Bothrocophias microphthalmus		62	9.2	2	11.22	10.48	7.3	3.563	10.85	35.63	620	0.304519
IBSP	55579		Bothrops alcatraz		47.9	7.65	1	4.35	-	5.39	2.461	4.35	24.61	479	0.176757
IBSP	61853		Bothrops alcatraz		50.75	6.85	2	5.66	5.65	7.6	2.894	5.655	28.94	507.5	0.195404
IBSP	87696		Bothrops alcatraz		46	5.95	2	4.21	4.04	5.06	2.558	4.125	25.58	460	0.161259
IBSP	88807		Bothrops alcatraz		53.8	8.3	1	5.65	5.11	5.11	2.882	5.38	28.82	538	0.186676
IBSP	88901		Bothrops alcatraz		61.6	7.85	2	7.4	7.65	7.39	3.264	7.525	32.64	616	0.230545
IBSP	50779		Bothrops erythromelas		50.2	8.8	1	5.5	4.58	5.31	2.268	5.04	22.68	502	0.222222
IBSP	50949		Bothrops erythromelas		43.1	7.95	1	5.61	4.33	4.45	2.22	4.97	22.2	431	0.223874
IBSP	50951		Bothrops erythromelas		45	8.1	1	4.08	4.1	5.47	2.234	4.09	22.34	450	0.18308
IBSP	89800		Bothrops erythromelas		46.05	8.1	1	4.82	4.76	4.48	2.059	4.79	20.59	460.5	0.232637
IBSP	90429		Bothrops erythromelas		53.3	7.35	2	5.66	5.5	5.14	2.801	5.58	28.01	533	0.199215
IBSP	666		Bothrops insularis		61.25	11.6	1	6.4	5.73	6.77	2.716	6.065	27.16	612.5	0.223306
IBSP	1866		Bothrops insularis		69.6	10.9	2	7.45	8.31	6.21	3.581	7.88	35.81	696	0.22005
IBSP	1871		Bothrops insularis		85.8	13.15	2	10.97	10.31	8.14	4.431	10.64	44.31	858	0.240126
IBSP	1939		Bothrops insularis		62.3	11.1	1	5.94	5.47	6.62	2.777	5.705	27.77	623	0.205438
IBSP	1970		Bothrops insularis		56.9	10.1	1	5.2	4.93	6.17	2.456	5.065	24.56	569	0.20623
IBSP	4521		Bothrops itapetiningae		52.45	4.9	2	7.75	6.98	4.63	2.666	7.365	26.66	524.5	0.276257
IBSP	4532		Bothrops itapetiningae		43.2	5.85	1	5.89	5.65	4.78	2.225	5.77	22.25	432	0.259326
IBSP	5991		Bothrops itapetiningae		43.1	4.4	2	7.52	6.9	4.24	2.438	7.21	24.38	431	0.295734
IBSP	7328		Bothrops itapetiningae		55.2	5.6	2	8.81	8.93	5.73	3.275	8.87	32.75	552	0.27084
IBSP	10374		Bothrops itapetiningae		37.5	5.4	1	4.82	4.5	4.3	2.069	4.66	20.69	375	0.22523
IBSP	556		Bothrops lutzi		52.8	6.6	2	5.45	5.69	5.26	2.534	5.57	25.34	528	0.219811
IBSP	557		Bothrops lutzi		56	5.6	2	5.47	5.57	5.02	2.519	5.52	25.19	560	0.219135
IBSP	560		Bothrops lutzi		57.75	7.5	2	4.87	4.52	5.66	2.576	4.695	25.76	577.5	0.182259
IBSP	44522		Bothrops lutzi		67.85	8.6	2	8.03	8.16	6.3	3.008	8.095	30.08	678.5	0.269116
IBSP	44523		Bothrops lutzi		60.3	8.15	2	7.57	6.98	5.6	2.836	7.275	28.36	603	0.256523
IBSP	90541		Bothrops marajoensis		79.1	11.1	1	7.91	8.04	5.94	3.572	7.975	35.72	791	0.223264
IBSP	90545		Bothrops marajoensis		78.3	12	2	7.55	6.9	6.97	3.754	7.225	37.54	783	0.192461
IBSP	90546		Bothrops marajoensis		61.1	9.1	1	6.29	6.96	6.42	2.847	6.625	28.47	611	0.232701
IBSP	90551		Bothrops marajoensis		85	13.8	2	9.04	9.38	8.25	4.152	9.21	41.52	850	0.221821
IBSP	56866		Bothrops marmoratus		68.5	9.5	2	7.96	7.5	7.1	3.046	7.73	30.46	685	0.253775
IBSP	56867		Bothrops marmoratus		56.1	7.9	2	7.58	7.05	6.35	2.931	7.315	29.31	561	0.249574
IBSP	56869		Bothrops marmoratus		59.9	8.8	2	7.04	6.33	6.38	2.855	6.685	28.55	599	0.234151
IBSP	57153		Bothrops marmoratus		47.2	7.8	1	5.16	4.41	5.3	2.249	4.785	22.49	472	0.212761
IBSP	57155		Bothrops marmoratus		46.8	7.45	1	4.78	4.48	5.06	2.344	4.63	23.44	468	0.197526
IBSP	21125		Bothrops matogrossensis		74.6	10	2	8.52	9.26	8.1	3.28	8.89	32.8	746	0.271037
IBSP	24108		Bothrops matogrossensis		87.1	7.5	2	10.85	11.03	7.25	3.689	10.94	36.89	871	0.296557
IBSP	86381		Bothrops pauloensis		41.9	7.2	1	5.34	5.01	4.16	2.278	5.175	22.78	419	0.227173
IBSP	87295		Bothrops pauloensis		63.3	9.2	1	8.27	7.66	5.81	3.068	7.965	30.68	633	0.259615
IBSP	89084		Bothrops pauloensis		78.2	9	2	8.7	7.8	9.01	3.67	8.25	36.7	782	0.224796
IBSP	89289		Bothrops pauloensis		69.5	8.7	2	8.51	8.3	8.57	3.201	8.405	32.01	695	0.262574
IBSP	89797		Bothrops pauloensis		44.3	6.9	1	5.4	5.37	4.11	2.451	5.385	24.51	443	0.219706
IBSP	5221		Bothrops pubescens		70	9.2	2	9.7	8.98	8.77	3.648	9.34	36.48	700	0.256031
IBSP	5606		Bothrops pubescens		71.9		2	8.56	7.71	7.1	3.643	8.135	36.43	719	0.223305
IBSP	6831		Bothrops pubescens		54.6	8.5	1	6.21	5.93	6.41	2.866	6.07	28.66	546	0.211793
IBSP	90129		Bothrops pubescens		58.2	9.9	1	6.3	5.96	6.73	3.071	6.13	30.71	582	0.199609
IBSP	90463		Bothrops pubescens		47.7	7	2	5.87	5.76	5.4	2.655	5.815	26.55	477	0.219021
IBSP	19756		Bothrops venezuelensis				2	11.84	11.64	7.79	4.421	11.74	44.21		0.265551
IBSP	21308		Vipera ursinii		29.6	3.2	2	2.77	3.08	4.6	1.926	2.925	19.26	296	0.151869
IBSP	31775		Vipera ursinii		27	3.25	2	2.02	2.18	3.3	1.65	2.1	16.5	270	0.127273
Ukraine			Azemiops feae	UKR_4055	51		1	4	4.1	7	2.191	4.05	21.91	510	0.184847
Ukraine			Protobothrops cornutus	UKR_4051	46.1	9.1	2	4.6	4.6	6.9	2.199	4.6	21.99	461	0.209186
Ukraine			Tropidolaemus subannulatus	UKR_4059	50.7	10.3	2	7	6.5	7.9	3.246	6.75	32.46	507	0.207948
Ukraine			Tropidolaemus wagleri	UKR_4063	54.8	10.2	2	9	8.8	11	3.689	8.9	36.89	548	0.241258
Ukraine			Vipera dinniki	UKR_4020	34.5	5.4	1	3.4	2.8	6	2.121	3.1	21.21	345	0.146157
Ukraine			Vipera dinniki	UKR_4028	40.8	4.5	2	4	3.8	6.4	2.362	3.9	23.62	408	0.165114
Ukraine			Vipera dinniki	UKR_4024	36	6	1	3.4	3.2	7	1.965	3.3	19.65	360	0.167939
Ukraine			Vipera eriwanensis	UKR_4044	40.5	4.8	2	3.2	3.2	7.8	2.112	3.2	21.12	405	0.151515
Ukraine			Vipera eriwanensis	UKR_4016	28.8	3.1	2	3.1	2.8	5.1	1.724	2.95	17.24	288	0.171114
Ukraine			Vipera eriwanensis	UKR_4012	46.9	5	2	3.5	4	6	2.068	3.75	20.68	469	0.181335
Ukraine			Vipera nikolskii	UKR_3983	59	8	2	5		7.7	2.602	5	26.02	590	0.19216
Ukraine			Vipera nikolskii	UKR_3987	55.5	7.1	2	5.7	5.3	8	2.788	5.5	27.88	555	0.197274
Ukraine			Vipera nikolskii	UKR_3979	52.3	6.7	2	5.1		7.2	2.216	5.1	22.16	523	0.230144
Ukraine			Vipera renardi	UKR_3997	41.5	5.9	1	4.1	3.5	6.5	2.316	3.8	23.16	415	0.164076
Ukraine			Vipera renardi	UKR_3994	52	5	2	5.3	4.7	7	2.677	5	26.77	520	0.186776
Ukraine			Vipera renardi	UKR_4003	47	5.2	2	4.6	4.4	6	2.387	4.5	23.87	470	0.188521
Ukraine			Vipera renardi	UKR_3993	41.6		2	4.9	4.6	7.2	2.418	4.75	24.18	416	0.196443
Ukraine			Vipera renardi	UKR_4000	42.2	6.3	1	5.2	4.5	6.5	2.296	4.85	22.96	422	0.211237
[truncated: 3 more rows]
